# Supplementary material for: Temporal patterns and drivers of CO 2 emission from dry sediments in a groyne field of a large river
Source: Copernicus journal article supplement (doi:10.5194/bg-19-5221-2022), 2022-11-18
Supplement: Supplementary file 1 [file bg-19-5221-2022-supplement.zip]

Archive with 3 entries (3 files):
- Koschorreck et al. SI.pdf
- Cflux_data.csv
- bg-19-5221-2022-supplement-title-page.pdf
