# Supplementary material for: Temporal patterns and drivers of CO 2 emission from dry sediments in a groyne field of a large river
Source: Copernicus journal article supplement (doi:10.5194/bg-19-5221-2022), 2022-11-18
Supplement: Supplementary file 1 [file bg-19-5221-2022-supplement.zip › bg-19-5221-2022-supplement-title-page.pdf]

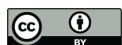

*Supplement of*

**Temporal patterns and drivers of CO<sub>2</sub> emission from dry sediments  
in a groyne field of a large river**

**Matthias Koschorreck et al.**

*Correspondence to:* Matthias Koschorreck ([matthias.koschorreck@ufz.de](mailto:matthias.koschorreck@ufz.de))

- [bg-19-5221-2022-supplement-title-page.pdf](#)
- [Cflux\\_data.csv](#)
- [Koschorreck et al. SI.pdf](#)

The copyright of individual parts of the supplement might differ from the article licence.
