# Supplementary material for: Temporal patterns and drivers of CO 2 emission from dry sediments in a groyne field of a large river
Source: Copernicus journal article supplement (doi:10.5194/bg-19-5221-2022), 2022-11-18
Supplement: Supplementary file 1 [file bg-19-5221-2022-supplement.zip › Cflux_data.csv]

cflux	datetime	position	flux	msoil	tsoil	waterlevel	diff	airtemperature	precipitation	period	month	site
c1	2020-05-01 01:00:00	95	54.54545455	29.1	11.1	77	18	11.4	0	1	5	1
c1	2020-05-01 02:00:00	95	60	29.3	10.3	77	18	10.3	0	1	5	1
c1	2020-05-01 03:00:00	95	60	29.4	9.8	77	18	9	0	1	5	1
c1	2020-05-01 04:00:00	95	43.63636364	29.3	9.5	77	18	8.1	0	1	5	1
c1	2020-05-01 05:00:00	95	27.27272727	29.4	9.7	77	18	8.8	0	1	5	1
c1	2020-05-01 06:00:00	95	5.454545455	29.4	9.6	77	18	8.8	0	1	5	1
c1	2020-05-01 07:00:00	95	54.54545455	29.4	10.4	77	18	9.4	0	1	5	1
c1	2020-05-01 08:00:00	95	49.09090909	29.3	10.8	77	18	11	0	1	5	1
c1	2020-05-01 09:00:00	95	21.81818182	29.1	11.5	77	18	12.3	0	1	5	1
c1	2020-05-01 10:00:00	95	65.45454545	29.3	12.8	77	18	13.5	0	1	5	1
c1	2020-05-01 11:00:00	95	54.54545455	29.2	12.4	77	18	12.8	0	1	5	1
c1	2020-05-01 12:00:00	95	54.54545455	28.9	15.2	77	18	14.4	0	1	5	1
c1	2020-05-01 13:00:00	95	43.63636364	28.9	16.2	77	18	14	0	1	5	1
c1	2020-05-01 14:00:00	95	54.54545455	29.1	16.2	77	18	15.1	0	1	5	1
c1	2020-05-01 15:00:00	95	60	28.9	16.7	77	18	15.5	0	1	5	1
c1	2020-05-01 16:00:00	95	16.36363636	28.9	15.5	77	18	15.8	0	1	5	1
c1	2020-05-01 17:00:00	95	65.45454545	28.9	15.4	77	18	15.4	0	1	5	1
c1	2020-05-01 18:00:00	95	76.36363636	29.2	14.4	77	18	15.8	0	1	5	1
c1	2020-05-01 19:00:00	95	5.454545455	29	12.3	77	18	12.2	0	1	5	1
c1	2020-05-01 20:00:00	95	-10.90909091	28.9	11.7	77	18	11.3	0.1	1	5	1
c1	2020-05-01 21:00:00	95	38.18181818	29.1	11.3	77	18	10.9	0	1	5	1
c1	2020-05-01 22:00:00	95	21.81818182	28.9	10.4	77	18	9.7	0	1	5	1
c1	2020-05-01 23:00:00	95	27.27272727	29.1	9.6	77	18	8.8	0	1	5	1
c1	2020-05-02 00:00:00	95	38.18181818	29.1	9.3	77	18	9.1	0	1	5	1
c1	2020-05-02 01:00:00	95	16.36363636	29.1	8.9	77	18	8.4	0	1	5	1
c1	2020-05-02 02:00:00	95	27.27272727	28.9	8.5	77	18	8.3	0	1	5	1
c1	2020-05-02 03:00:00	95	49.09090909	29.2	8	77	18	7.9	0	1	5	1
c1	2020-05-02 04:00:00	95	21.81818182	29.2	8.1	77	18	7.2	0	1	5	1
c1	2020-05-02 05:00:00	95	27.27272727	29.2	8.4	77	18	7.5	0	1	5	1
c1	2020-05-02 06:00:00	95	60	29.2	8.3	77	18	7.4	0	1	5	1
c1	2020-05-02 07:00:00	95	32.72727273	29.3	9.2	76	19	7.8	0	1	5	1
c1	2020-05-02 08:00:00	95	32.72727273	29.1	10.2	76	19	9.5	0	1	5	1
c1	2020-05-02 09:00:00	95	16.36363636	29.2	10.8	76	19	9.6	0	1	5	1
c1	2020-05-02 10:00:00	95	38.18181818	29.2	12	76	19	11.1	0	1	5	1
c1	2020-05-02 11:00:00	95	38.18181818	29.1	13	76	19	12.5	0	1	5	1
c1	2020-05-02 12:00:00	95	21.81818182	29.2	12.1	76	19	12.7	0	1	5	1
c1	2020-05-02 13:00:00	95	10.90909091	29	14	76	19	13.2	0	1	5	1
c1	2020-05-02 14:00:00	95	-38.18181818	34.5	11.5	76	19	11.5	2.7	1	5	1
c1	2020-05-02 15:00:00	95	-10.90909091	33.7	11.3	76	19	11.2	0	1	5	1
c1	2020-05-02 16:00:00	95	0	33.5	12.3	76	19	11.4	0	1	5	1
c1	2020-05-02 17:00:00	95	0	33.3	11.9	76	19	11.6	0	1	5	1
c1	2020-05-02 18:00:00	95	-5.454545455	33.5	12.6	76	19	12.1	0	1	5	1
c1	2020-05-02 19:00:00	95	-5.454545455	33.3	10.8	76	19	10.6	0	1	5	1
c1	2020-05-02 20:00:00	95	-21.81818182	33.2	10.2	76	19	9.1	0.6	1	5	1
c1	2020-05-02 21:00:00	95	0	33.2	9.8	76	19	8.9	0.1	1	5	1
c1	2020-05-02 22:00:00	95	27.27272727	33.3	9.6	76	19	8.7	0.2	1	5	1
c1	2020-05-02 23:00:00	95	21.81818182	33	9.3	76	19	8.6	0	1	5	1
c1	2020-05-03 00:00:00	95	5.454545455	33	8.8	76	19	8.1	0	1	5	1
c1	2020-05-03 01:00:00	95	21.81818182	33	8.4	76	19	7.4	0	1	5	1
c1	2020-05-03 02:00:00	95	16.36363636	33.2	8	76	19	6.8	0	1	5	1
c1	2020-05-03 03:00:00	95	16.36363636	33	8.3	76	19	7.2	0	1	5	1
c1	2020-05-03 04:00:00	95	32.72727273	33.1	8.5	76	19	8.3	0	1	5	1
c1	2020-05-03 05:00:00	95	10.90909091	33.1	8.9	76	19	8.4	0	1	5	1
c1	2020-05-03 06:00:00	95	16.36363636	33	8.9	76	19	8.6	0	1	5	1
c1	2020-05-03 07:00:00	95	5.454545455	33	8.8	76	19	8.5	0	1	5	1
c1	2020-05-03 08:00:00	95	0	33	9.3	76	19	9.9	0	1	5	1
c1	2020-05-03 09:00:00	95	10.90909091	33.2	10.3	76	19	9.9	0	1	5	1
c1	2020-05-03 10:00:00	95	-10.90909091	32.9	11.6	76	19	10.8	0	1	5	1
c1	2020-05-03 11:00:00	95	-10.90909091	32.6	13.1	76	19	12.3	0	1	5	1
c1	2020-05-03 12:00:00	95	0	32.6	13	76	19	12.8	0	1	5	1
c1	2020-05-03 13:00:00	95	-32.72727273	32.6	14.3	76	19	13.2	0	1	5	1
c1	2020-05-03 14:00:00	95	21.81818182	32.6	13.3	76.25	18.75	13.4	0	1	5	1
c1	2020-05-03 15:00:00	95	5.454545455	32.6	13.8	76.5	18.5	15.2	0	1	5	1
c1	2020-05-03 16:00:00	95	-38.18181818	32.5	16.3	77	18	14	0	1	5	1
c1	2020-05-03 17:00:00	95	16.36363636	32.4	14.4	77	18	14.1	0	1	5	1
c1	2020-05-03 18:00:00	95	43.63636364	32.4	14.1	77	18	14.2	0	1	5	1
c1	2020-05-03 19:00:00	95	16.36363636	32.6	13.4	77	18	14.2	0	1	5	1
c1	2020-05-03 20:00:00	95	49.09090909	32.4	12.4	77	18	13.1	0	1	5	1
c1	2020-05-03 21:00:00	95	32.72727273	32.7	11.3	77	18	10.6	0	1	5	1
c1	2020-05-03 22:00:00	95	5.454545455	32.7	9.7	77	18	9.8	0	1	5	1
c1	2020-05-03 23:00:00	95	43.63636364	32.8	8.3	77	18	7.5	0	1	5	1
c1	2020-05-04 00:00:00	95	0	32.8	8.1	77.5	17.5	6.8	0	1	5	1
c1	2020-05-04 01:00:00	95	-38.18181818	32.8	8.4	78	17	6.8	0	1	5	1
c1	2020-05-04 02:00:00	95	32.72727273	32.8	8.3	78	17	7.6	0	1	5	1
c1	2020-05-04 03:00:00	95	27.27272727	32.8	8.4	78	17	8.1	0	1	5	1
c1	2020-05-04 04:00:00	95	27.27272727	32.8	8.9	78	17	7.7	0	1	5	1
c1	2020-05-04 05:00:00	95	10.90909091	32.8	8.8	78.5	16.5	8.2	0	1	5	1
c1	2020-05-04 06:00:00	95	21.81818182	33.1	8.5	79	16	8.1	0.3	1	5	1
c1	2020-05-04 07:00:00	95	5.454545455	32.9	8.9	79	16	8.4	0.2	1	5	1
c1	2020-05-04 08:00:00	95	16.36363636	32.9	9.5	79	16	8.9	0.1	1	5	1
c1	2020-05-04 09:00:00	95	-21.81818182	32.9	9.9	80	15	9.3	0.4	1	5	1
c1	2020-05-04 10:00:00	95	-87.27272727	33.5	10.3	80	15	9.1	0.8	1	5	1
c1	2020-05-04 11:00:00	95	-60	33.9	10.8	80	15	9.5	1.1	1	5	1
c1	2020-05-04 12:00:00	95	-49.09090909	33.6	12.7	80.25	14.75	10.2	0.7	1	5	1
c1	2020-05-04 13:00:00	95	-16.36363636	33.5	15.4	81	14	10.9	0.1	1	5	1
c1	2020-05-04 14:00:00	95	-38.18181818	33.4	14.1	81	14	11	0	1	5	1
c1	2020-05-04 15:00:00	95	-16.36363636	33.7	13.5	81	14	10.4	0	1	5	1
c1	2020-05-04 16:00:00	95	-21.81818182	33.7	14.1	81	14	11	0	1	5	1
c1	2020-05-04 17:00:00	95	-5.454545455	33.4	16	81	14	12	0	1	5	1
c1	2020-05-04 18:00:00	95	-21.81818182	33.7	14.6	80.25	14.75	12.4	0	1	5	1
c1	2020-05-04 19:00:00	95	0	33.5	15	80.25	14.75	12.8	0	1	5	1
c1	2020-05-04 20:00:00	95	5.454545455	33.4	13	80	15	11.7	0	1	5	1
c1	2020-05-04 21:00:00	95	5.454545455	33.7	10.4	80	15	8.8	0	1	5	1
c1	2020-05-04 22:00:00	95	16.36363636	33.9	9.3	80	15	6.4	0	1	5	1
c1	2020-05-04 23:00:00	95	10.90909091	33.9	8.4	80	15	7.4	0	1	5	1
c1	2020-05-05 00:00:00	95	38.18181818	34	8.2	79.5	15.5	6.6	0	1	5	1
c1	2020-05-05 01:00:00	95	10.90909091	34	7.8	79	16	6.5	0	1	5	1
c1	2020-05-05 02:00:00	95	54.54545455	34	7.7	79	16	6.2	0	1	5	1
c1	2020-05-05 03:00:00	95	32.72727273	33.8	7.2	79	16	5.5	0	1	5	1
c1	2020-05-05 04:00:00	95	27.27272727	33.8	6.5	79	16	4.7	0	1	5	1
c1	2020-05-05 05:00:00	95	16.36363636	33.9	6	79	16	3.5	0	1	5	1
c1	2020-05-05 06:00:00	95	16.36363636	33.9	6.1	79	16	3.8	0	1	5	1
c1	2020-05-05 07:00:00	95	5.454545455	33.9	5.9	79.25	15.75	4.4	0	1	5	1
c1	2020-05-05 08:00:00	95	21.81818182	33.9	6.4	80	15	5.7	0	1	5	1
c1	2020-05-05 09:00:00	95	0	33.8	7.5	80	15	7.4	0	1	5	1
c1	2020-05-05 10:00:00	95	21.81818182	33.8	9.8	80	15	9.7	0	1	5	1
c1	2020-05-05 11:00:00	95	5.454545455	33.5	12	80	15	10.6	0	1	5	1
c1	2020-05-05 12:00:00	95	0	33.5	12	80	15	11.8	0	1	5	1
c1	2020-05-05 13:00:00	95	-5.454545455	33.3	12.7	81	14	11.8	0	1	5	1
c1	2020-05-05 14:00:00	95	-5.454545455	33	17.5	80.5	14.5	11.6	0	1	5	1
c1	2020-05-05 15:00:00	95	-10.90909091	33.2	15.8	80	15	13.2	0	1	5	1
c1	2020-05-05 16:00:00	95	-10.90909091	33.2	18.4	80	15	13.5	0	1	5	1
c1	2020-05-05 17:00:00	95	5.454545455	33.2	17.5	80	15	12.6	0	1	5	1
c1	2020-05-05 18:00:00	95	-16.36363636	33.3	14.1	80.25	14.75	11.2	0	1	5	1
c1	2020-05-05 19:00:00	95	16.36363636	33.3	14.3	80	15	11	0	1	5	1
c1	2020-05-05 20:00:00	95	10.90909091	33.3	12.3	80	15	10.4	0	1	5	1
c1	2020-05-05 21:00:00	95	21.81818182	33.3	9.9	80.75	14.25	8.4	0	1	5	1
c1	2020-05-05 22:00:00	95	49.09090909	33.6	9.1	80	15	5.4	0	1	5	1
c1	2020-05-05 23:00:00	95	32.72727273	33.6	8	80	15	4.4	0	1	5	1
c1	2020-05-06 00:00:00	95	10.90909091	33.9	7.4	80	15	3.6	0	1	5	1
c1	2020-05-06 01:00:00	95	16.36363636	33.9	6.7	80	15	3.6	0	1	5	1
c1	2020-05-06 02:00:00	95	5.454545455	33.7	5.9	80	15	2.7	0	1	5	1
c1	2020-05-06 03:00:00	95	38.18181818	34	5.8	80	15	2.1	0	1	5	1
c1	2020-05-06 04:00:00	95	21.81818182	34	5.1	80	15	2.5	0	1	5	1
c1	2020-05-06 05:00:00	95	32.72727273	34	5.2	80	15	1.8	0	1	5	1
c1	2020-05-06 06:00:00	95	38.18181818	34	5.1	80	15	1.9	0	1	5	1
c1	2020-05-06 07:00:00	95	16.36363636	33.8	5.5	80	15	4.4	0	1	5	1
c1	2020-05-06 08:00:00	95	27.27272727	33.8	6.6	80	15	8.5	0	1	5	1
c1	2020-05-06 09:00:00	95	60	33.9	7.8	80.25	14.75	10.1	0	1	5	1
c1	2020-05-06 10:00:00	95	70.90909091	33.9	9.9	80.5	14.5	11.9	0	1	5	1
c1	2020-05-06 11:00:00	95	21.81818182	33.5	12.7	80.25	14.75	13.1	0	1	5	1
c1	2020-05-06 12:00:00	95	49.09090909	33.1	15.7	80.5	14.5	13.9	0	1	5	1
c1	2020-05-06 13:00:00	95	10.90909091	32.9	18.8	80	15	14.7	0	1	5	1
c1	2020-05-06 14:00:00	95	49.09090909	32.8	20.7	80	15	15.8	0	1	5	1
c1	2020-05-06 15:00:00	95	49.09090909	33	19.7	80	15	16.5	0	1	5	1
c1	2020-05-06 16:00:00	95	76.36363636	33	19.5	80	15	17	0	1	5	1
c1	2020-05-06 17:00:00	95	70.90909091	33.2	18.8	80	15	16.8	0	1	5	1
c1	2020-05-06 18:00:00	95	70.90909091	33	17.7	80	15	16.9	0	1	5	1
c1	2020-05-06 19:00:00	95	60	33.3	15.8	79.5	15.5	16.7	0	1	5	1
c1	2020-05-06 20:00:00	95	65.45454545	33.2	13.4	80	15	15.4	0	1	5	1
c1	2020-05-06 21:00:00	95	109.0909091	33.5	11.6	80	15	13.4	0	1	5	1
c1	2020-05-06 22:00:00	95	92.72727273	33.6	10.4	80	15	10.1	0	1	5	1
c1	2020-05-06 23:00:00	95	65.45454545	33.3	9.3	80	15	8.8	0	1	5	1
c1	2020-05-07 00:00:00	95	49.09090909	33.6	8.4	80	15	6.8	0	1	5	1
c1	2020-05-07 01:00:00	95	81.81818182	33.6	7.8	80	15	5.9	0	1	5	1
c1	2020-05-07 02:00:00	95	49.09090909	33.6	7.3	80	15	4.4	0	1	5	1
c1	2020-05-07 03:00:00	95	70.90909091	33.7	6.9	80	15	5.5	0	1	5	1
c1	2020-05-07 04:00:00	95	43.63636364	33.7	6.4	79.75	15.25	4.6	0	1	5	1
c1	2020-05-07 05:00:00	95	38.18181818	33.6	7	79.25	15.75	5.2	0	1	5	1
c1	2020-05-07 06:00:00	95	27.27272727	33.7	7.4	80	15	6	0	1	5	1
c1	2020-05-07 07:00:00	95	38.18181818	33.5	8.1	79	16	6.8	0	1	5	1
c1	2020-05-07 08:00:00	95	5.454545455	33.6	8.6	79	16	7.6	0	1	5	1
c1	2020-05-07 09:00:00	95	54.54545455	33.4	9.7	79	16	8.4	0	1	5	1
c1	2020-05-07 10:00:00	95	27.27272727	33.6	10.1	79	16	9.5	0	1	5	1
c1	2020-05-07 10:00:00	95	27.27272727	33.6	10.1	79	16	9.5	0	1	5	1
c1	2020-05-07 10:00:00	95	38.18181818	33.7	10.4	79	16	9.5	0	1	5	1
c1	2020-05-07 10:00:00	95	38.18181818	33.7	10.4	79	16	9.5	0	1	5	1
c1	2020-05-07 11:00:00	95	43.63636364	33.5	12.7	79	16	10.9	0	1	5	1
c1	2020-05-07 12:00:00	95	60	33.2	15.5	78.25	16.75	12.5	0	1	5	1
c1	2020-05-07 13:00:00	95	60	33	18	79	16	13.7	0	1	5	1
c1	2020-05-07 14:00:00	95	54.54545455	32.9	20.3	78.75	16.25	15.6	0	1	5	1
c1	2020-05-07 15:00:00	95	76.36363636	32.6	21.3	78.25	16.75	16.6	0	1	5	1
c1	2020-05-07 16:00:00	95	92.72727273	32.5	22.4	78.75	16.25	17.7	0	1	5	1
c1	2020-05-07 17:00:00	95	54.54545455	32.6	21.1	78.75	16.25	18.2	0	1	5	1
c1	2020-05-07 18:00:00	95	87.27272727	32.6	20.5	78.5	16.5	18.6	0	1	5	1
c1	2020-05-07 19:00:00	95	54.54545455	32.4	19.1	78.75	16.25	18.1	0	1	5	1
c1	2020-05-07 20:00:00	95	65.45454545	32.8	16.3	79	16	16.8	0	1	5	1
c1	2020-05-07 21:00:00	95	76.36363636	32.8	14	79	16	13.6	0	1	5	1
c1	2020-05-07 22:00:00	95	60	33.1	12.7	79	16	11.3	0	1	5	1
c1	2020-05-07 23:00:00	95	49.09090909	33.2	11	78	17	10.1	0	1	5	1
c1	2020-05-08 00:00:00	95	43.63636364	33	10.3	78.25	16.75	9.3	0	1	5	1
c1	2020-05-08 01:00:00	95	54.54545455	33.1	10.3	78.25	16.75	9.2	0	1	5	1
c1	2020-05-08 02:00:00	95	49.09090909	33.3	9.8	78.25	16.75	9.6	0	1	5	1
c1	2020-05-08 03:00:00	95	38.18181818	33.1	9.2	78.5	16.5	8.9	0	1	5	1
c1	2020-05-08 04:00:00	95	49.09090909	33.3	8.3	78.5	16.5	7.7	0	1	5	1
c1	2020-05-08 05:00:00	95	38.18181818	33.3	7.6	78.25	16.75	6.9	0	1	5	1
c1	2020-05-08 06:00:00	95	54.54545455	33.4	7.2	78	17	6.2	0	1	5	1
c1	2020-05-08 07:00:00	95	32.72727273	33.4	8.3	78.5	16.5	9.2	0	1	5	1
c1	2020-05-08 08:00:00	95	38.18181818	33.2	9.8	78.5	16.5	12.1	0	1	5	1
c1	2020-05-08 09:00:00	95	49.09090909	33.2	11.3	78	17	13.7	0	1	5	1
c1	2020-05-08 10:00:00	95	70.90909091	33.1	13.8	78	17	16.2	0	1	5	1
c1	2020-05-08 11:00:00	95	70.90909091	32.9	17	78	17	18.5	0	1	5	1
c1	2020-05-08 12:00:00	95	81.81818182	32.6	19.1	78	17	19.1	0	1	5	1
c1	2020-05-08 13:00:00	95	109.0909091	32.3	21.5	78	17	20.3	0	1	5	1
c1	2020-05-08 14:00:00	95	120	32.3	23	78	17	20.4	0	1	5	1
c1	2020-05-08 15:00:00	95	120	32.2	23.7	78	17	20.8	0	1	5	1
c1	2020-05-08 16:00:00	95	98.18181818	32.2	23.7	78	17	21.2	0	1	5	1
c1	2020-05-08 17:00:00	95	103.6363636	32.3	23	78	17	21.2	0	1	5	1
c1	2020-05-08 18:00:00	95	114.5454545	32.1	23	78	17	21.1	0	1	5	1
c1	2020-05-08 19:00:00	95	103.6363636	32.2	20.5	78	17	20.6	0	1	5	1
c1	2020-05-08 20:00:00	95	114.5454545	32.4	17.7	78	17	18.9	0	1	5	1
c1	2020-05-08 21:00:00	95	109.0909091	32.5	16	77.5	17.5	17.2	0	1	5	1
c1	2020-05-08 22:00:00	95	76.36363636	32.6	14.3	77.25	17.75	14.6	0	1	5	1
c1	2020-05-08 23:00:00	95	125.4545455	32.7	12.3	77	18	12.7	0	1	5	1
c1	2020-05-09 00:00:00	95	60	33	11.3	77.25	17.75	10.6	0	1	5	1
c1	2020-05-09 01:00:00	95	54.54545455	32.8	10.4	77	18	10.2	0	1	5	1
c1	2020-05-09 02:00:00	95	27.27272727	32.8	9.3	77.25	17.75	9.5	0	1	5	1
c1	2020-05-09 03:00:00	95	49.09090909	33	8.6	77.5	17.5	8.1	0	1	5	1
c1	2020-05-09 04:00:00	95	76.36363636	33	8.4	78	17	7.6	0	1	5	1
c1	2020-05-09 05:00:00	95	49.09090909	33.1	7.5	78	17	7.9	0	1	5	1
c1	2020-05-09 06:00:00	95	76.36363636	32.9	7.2	78	17	6.5	0	1	5	1
c1	2020-05-09 07:00:00	95	65.45454545	32.9	8.1	78	17	8.4	0	1	5	1
c1	2020-05-09 08:00:00	95	60	33.1	9.5	77.25	17.75	12.9	0	1	5	1
c1	2020-05-09 09:00:00	95	54.54545455	32.9	11.3	77	18	16.4	0	1	5	1
c1	2020-05-09 10:00:00	95	76.36363636	33	13.7	77	18	18.3	0	1	5	1
c1	2020-05-09 11:00:00	95	103.6363636	32.6	16.7	77	18	19.6	0	1	5	1
c1	2020-05-09 12:00:00	95	136.3636364	32.2	19.5	77	18	20.3	0	1	5	1
c1	2020-05-09 13:00:00	95	98.18181818	31.8	21.9	76.75	18.25	21.6	0	1	5	1
c1	2020-05-09 14:00:00	95	125.4545455	31.8	23.5	76.25	18.75	22	0	1	5	1
c1	2020-05-09 15:00:00	95	120	31.7	25.1	76	19	22.8	0	1	5	1
c1	2020-05-09 16:00:00	95	125.4545455	31.7	23.9	76	19	22.5	0	1	5	1
c1	2020-05-09 17:00:00	95	81.81818182	31.8	22.1	76	19	23	0	1	5	1
c1	2020-05-09 18:00:00	95	109.0909091	31.8	21.9	76	19	22.8	0	1	5	1
c1	2020-05-09 19:00:00	95	125.4545455	32	21.3	76	19	22.8	0	1	5	1
c1	2020-05-09 20:00:00	95	120	31.8	20.7	76	19	22.1	0	1	5	1
c1	2020-05-09 21:00:00	95	152.7272727	31.7	16.7	75.75	19.25	18.7	0	1	5	1
c1	2020-05-09 22:00:00	95	120	32.1	14.4	75.75	19.25	16.8	0	1	5	1
c1	2020-05-09 23:00:00	95	114.5454545	32.3	13	75.5	19.5	13.8	0	1	5	1
c1	2020-05-10 00:00:00	95	81.81818182	32.2	11.9	75.5	19.5	11.9	0	1	5	1
c1	2020-05-10 01:00:00	95	76.36363636	32.4	11.1	75	20	12.2	0	1	5	1
c1	2020-05-10 02:00:00	95	125.4545455	32.4	10.8	75	20	9.9	0	1	5	1
c1	2020-05-10 03:00:00	95	65.45454545	32.4	9.5	75.5	19.5	10	0	1	5	1
c1	2020-05-10 04:00:00	95	32.72727273	32.4	9.6	75.75	19.25	8.1	0	1	5	1
c1	2020-05-10 05:00:00	95	70.90909091	32.4	9.1	76	19	8.8	0	1	5	1
c1	2020-05-10 06:00:00	95	49.09090909	32.6	8.6	75.75	19.25	8.1	0	1	5	1
c1	2020-05-10 07:00:00	95	76.36363636	32.5	9.8	75.75	19.25	9.7	0	1	5	1
c1	2020-05-10 08:00:00	95	87.27272727	32.4	11.1	75.25	19.75	12.6	0	1	5	1
c1	2020-05-10 09:00:00	95	76.36363636	32.4	12.8	75	20	16.7	0	1	5	1
c1	2020-05-10 10:00:00	95	65.45454545	32.2	14.9	75	20	17.1	0	1	5	1
c1	2020-05-10 11:00:00	95	81.81818182	31.8	18	75	20	17.9	0	1	5	1
c1	2020-05-10 12:00:00	95	76.36363636	32	19.1	75	20	20.4	0	1	5	1
c1	2020-05-10 13:00:00	95	70.90909091	31.4	22.4	74.25	20.75	21.7	0	1	5	1
c1	2020-05-10 14:00:00	95	76.36363636	31.3	22.8	74	21	22.6	0	1	5	1
c1	2020-05-10 15:00:00	95	81.81818182	31.8	20.7	74.25	20.75	22.4	0	1	5	1
c1	2020-05-10 16:00:00	95	76.36363636	31.5	20.1	74.75	20.25	21.7	0	1	5	1
c1	2020-05-10 17:00:00	95	92.72727273	31.9	19.5	75	20	19.7	0.1	1	5	1
c1	2020-05-10 18:00:00	95	92.72727273	31.8	18.9	75	20	18.4	0.3	1	5	1
c1	2020-05-10 19:00:00	95	92.72727273	31.9	18.4	75	20	19.2	0	1	5	1
c1	2020-05-10 20:00:00	95	120	31.7	17.5	75	20	17.9	0	1	5	1
c1	2020-05-10 21:00:00	95	136.3636364	31.8	17	75	20	17	0	1	5	1
c1	2020-05-10 22:00:00	95	141.8181818	31.9	16.3	75	20	16.3	0	1	5	1
c1	2020-05-10 23:00:00	95	120	31.8	15.7	75	20	15.6	0	1	5	1
c1	2020-05-11 00:00:00	95	103.6363636	31.8	15.5	75	20	15.4	0	1	5	1
c1	2020-05-11 01:00:00	95	141.8181818	31.8	14.6	74	21	14.4	0	1	5	1
c1	2020-05-11 02:00:00	95	147.2727273	31.9	13.3	74	21	11.8	0	1	5	1
c1	2020-05-11 03:00:00	95	98.18181818	31.9	12.1	74	21	10.2	0	1	5	1
c1	2020-05-11 04:00:00	95	98.18181818	32.2	11.3	74.25	20.75	10	0	1	5	1
c1	2020-05-11 05:00:00	95	125.4545455	32	10.6	74.25	20.75	9.2	0	1	5	1
c1	2020-05-11 06:00:00	95	109.0909091	32.1	9.7	74	21	6.7	0	1	5	1
c1	2020-05-11 07:00:00	95	76.36363636	32.1	8.9	74	21	5.3	0.2	1	5	1
c1	2020-05-11 08:00:00	95	60	32.2	8.9	74	21	5.4	0.2	1	5	1
c1	2020-05-11 09:00:00	95	27.27272727	32.1	8.9	74	21	5.7	0.1	1	5	1
c1	2020-05-11 10:00:00	95	-5.454545455	32.3	9.1	74	21	5.8	0.5	1	5	1
c1	2020-05-11 11:00:00	95	-38.18181818	32.3	9.2	74	21	5.6	1.1	1	5	1
c1	2020-05-11 12:00:00	95	-27.27272727	32.4	9.7	74.5	20.5	6.1	1.7	1	5	1
c1	2020-05-11 13:00:00	95	-60	32	10.1	75	20	6.6	0.7	1	5	1
c1	2020-05-11 14:00:00	95	-27.27272727	32.6	9.8	75	20	6.7	0.5	1	5	1
c1	2020-05-11 15:00:00	95	-38.18181818	33.7	9.1	75	20	5.9	2.5	1	5	1
c1	2020-05-11 16:00:00	95	-5.454545455	33.4	9.2	75	20	6.7	1.1	1	5	1
c1	2020-05-11 17:00:00	95	0	32.6	9.9	75	20	7.4	0	1	5	1
c1	2020-05-11 18:00:00	95	-5.454545455	32.5	9.5	75	20	7.5	0	1	5	1
c1	2020-05-11 19:00:00	95	16.36363636	32.7	10.2	75	20	8.9	0	1	5	1
c1	2020-05-11 20:00:00	95	32.72727273	32.7	8.8	74	21	8.1	0	1	5	1
c1	2020-05-11 21:00:00	95	27.27272727	32.8	7.1	74	21	6.9	0	1	5	1
c1	2020-05-11 22:00:00	95	16.36363636	32.9	6.1	74	21	5.1	0	1	5	1
c1	2020-05-11 23:00:00	95	49.09090909	32.8	5.7	74	21	3.1	0	1	5	1
c1	2020-05-12 00:00:00	95	43.63636364	32.6	5	74	21	1.8	0	1	5	1
c1	2020-05-12 01:00:00	95	16.36363636	32.8	4.6	73.75	21.25	1	0	1	5	1
c1	2020-05-12 02:00:00	95	32.72727273	32.9	4	73.25	21.75	1.4	0	1	5	1
c1	2020-05-12 03:00:00	95	16.36363636	32.8	3.7	73.75	21.25	1.2	0	1	5	1
c1	2020-05-12 04:00:00	95	43.63636364	32.8	3.2	74	21	1.2	0	1	5	1
c1	2020-05-12 05:00:00	95	5.454545455	32.8	3	74	21	1.3	0	1	5	1
c1	2020-05-12 06:00:00	95	10.90909091	32.8	3	74	21	1.6	0	1	5	1
c1	2020-05-12 07:00:00	95	10.90909091	32.9	3.8	74	21	2.7	0	1	5	1
c1	2020-05-12 08:00:00	95	21.81818182	32.7	4.9	74	21	4.2	0	1	5	1
c1	2020-05-12 09:00:00	95	5.454545455	32.7	6.3	74	21	6.7	0	1	5	1
c1	2020-05-12 10:00:00	95	16.36363636	32.5	8.6	73.5	21.5	7.5	0	1	5	1
c1	2020-05-12 11:00:00	95	5.454545455	32	9.6	73.75	21.25	8.9	0	1	5	1
c1	2020-05-12 12:00:00	95	16.36363636	32.3	8.9	73.5	21.5	7.6	0	1	5	1
c1	2020-05-12 13:00:00	95	10.90909091	32.2	9	73	22	7	0.3	1	5	1
c1	2020-05-12 14:00:00	95	-5.454545455	32.2	10.3	73	22	8.4	0	1	5	1
c1	2020-05-12 15:00:00	95	32.72727273	32	12.1	73	22	9.6	0	1	5	1
c1	2020-05-12 16:00:00	95	-10.90909091	31.7	14.4	73	22	10.3	0	1	5	1
c1	2020-05-12 17:00:00	95	16.36363636	31.7	14.4	73	22	11.4	0	1	5	1
c1	2020-05-12 18:00:00	95	10.90909091	31.7	12.6	73	22	11.7	0	1	5	1
c1	2020-05-12 19:00:00	95	21.81818182	32	11.1	73.25	21.75	10.8	0	1	5	1
c1	2020-05-12 20:00:00	95	27.27272727	32.1	10.2	73.75	21.25	10.3	0	1	5	1
c1	2020-05-12 21:00:00	95	27.27272727	31.8	9.3	74	21	9.6	0	1	5	1
c1	2020-05-12 22:00:00	95	49.09090909	32.1	8.2	74	21	8.7	0	1	5	1
c1	2020-05-12 23:00:00	95	27.27272727	32.1	7.3	74	21	5.6	0	1	5	1
c1	2020-05-13 00:00:00	95	32.72727273	32.2	6.7	74	21	5.8	0	1	5	1
c1	2020-05-13 01:00:00	95	70.90909091	32.1	6.9	74	21	5.9	0	1	5	1
c1	2020-05-13 02:00:00	95	32.72727273	32.2	6.3	74	21	6.1	0	1	5	1
c1	2020-05-13 03:00:00	95	32.72727273	32.2	6.5	74	21	6	0	1	5	1
c1	2020-05-13 04:00:00	95	43.63636364	32.2	6.4	74	21	5.9	0	1	5	1
c1	2020-05-13 05:00:00	95	54.54545455	32.4	6	74	21	5.8	0	1	5	1
c1	2020-05-13 06:00:00	95	49.09090909	32.2	6.3	74.5	20.5	6.2	0	1	5	1
c1	2020-05-13 07:00:00	95	49.09090909	32.4	6.9	75	20	6.4	0	1	5	1
c1	2020-05-13 08:00:00	95	-5.454545455	32.3	8.1	75	20	7.1	0	1	5	1
c1	2020-05-13 09:00:00	95	16.36363636	32.3	8.9	75	20	8.7	0	1	5	1
c3	2020-05-13 10:00:00	95	354.5454545	44.2	15.8	75.25	19.75	10.7	0	1	5	1
c1	2020-05-13 11:00:00	95	10.90909091	32.5	12	76	19	11.3	0	1	5	1
c1	2020-05-13 11:00:00	95	10.90909091	32.5	12	76	19	11.3	0	1	5	1
c1	2020-05-13 11:00:00	95	10.90909091	32.5	12	76	19	11.3	0	1	5	1
c1	2020-05-13 11:00:00	95	10.90909091	32.5	12	76	19	11.3	0	1	5	1
c1	2020-05-13 11:00:00	95	16.36363636	32.5	12.8	76	19	11.3	0	1	5	1
c1	2020-05-13 11:00:00	95	16.36363636	32.5	12.8	76	19	11.3	0	1	5	1
c1	2020-05-13 11:00:00	95	16.36363636	32.5	12.8	76	19	11.3	0	1	5	1
c1	2020-05-13 11:00:00	95	16.36363636	32.5	12.8	76	19	11.3	0	1	5	1
c2	2020-05-13 11:00:00	95	32.72727273	32.6	16.8	76	19	11.3	0	1	5	1
c2	2020-05-13 11:00:00	95	43.63636364	32.5	16.7	76	19	11.3	0	1	5	1
c2	2020-05-13 11:00:00	95	43.63636364	32.5	16.7	76	19	11.3	0	1	5	1
c2	2020-05-13 11:00:00	95	43.63636364	32.5	16.7	76	19	11.3	0	1	5	1
c2	2020-05-13 11:00:00	95	43.63636364	32.5	16.7	76	19	11.3	0	1	5	1
c2	2020-05-13 11:00:00	95	32.72727273	32.6	16.8	76	19	11.3	0	1	5	1
c2	2020-05-13 11:00:00	95	32.72727273	32.6	16.8	76	19	11.3	0	1	5	1
c2	2020-05-13 11:00:00	95	32.72727273	32.6	16.8	76	19	11.3	0	1	5	1
c3	2020-05-13 11:00:00	95	212.7272727	34.2	16.7	76	19	11.3	0	1	5	1
c3	2020-05-13 11:00:00	95	212.7272727	34.2	16.7	76	19	11.3	0	1	5	1
c3	2020-05-13 11:00:00	95	212.7272727	34.2	16.7	76	19	11.3	0	1	5	1
c3	2020-05-13 11:00:00	95	212.7272727	34.2	16.7	76	19	11.3	0	1	5	1
c1	2020-05-13 12:00:00	95	10.90909091	32.4	13.7	76	19	11.9	0	1	5	1
c2	2020-05-13 12:00:00	95	70.90909091	32.7	15.7	76	19	11.9	0	1	5	1
c3	2020-05-13 12:00:00	95	130.9090909	34.4	15.8	76	19	11.9	0	1	5	1
c1	2020-05-13 13:00:00	95	5.454545455	32.4	14.6	76.5	18.5	13.5	0	1	5	1
c2	2020-05-13 13:00:00	95	43.63636364	32.6	15.5	76.5	18.5	13.5	0	1	5	1
c3	2020-05-13 13:00:00	95	141.8181818	34.3	15.7	76.5	18.5	13.5	0	1	5	1
c1	2020-05-13 14:00:00	95	0	32.4	15.8	77	18	12.6	0	1	5	1
c2	2020-05-13 14:00:00	95	43.63636364	32.8	16.5	77	18	12.6	0	1	5	1
c3	2020-05-13 14:00:00	95	125.4545455	34.5	16.7	77	18	12.6	0	1	5	1
c1	2020-05-13 15:00:00	95	0	32.2	16.8	77	18	13	0	1	5	1
c2	2020-05-13 15:00:00	95	81.81818182	32.6	17.3	77	18	13	0	1	5	1
c3	2020-05-13 15:00:00	95	141.8181818	34.1	17.2	77	18	13	0	1	5	1
c1	2020-05-13 16:00:00	95	10.90909091	32.2	15.4	77	18	13.2	0	1	5	1
c2	2020-05-13 16:00:00	95	76.36363636	32.9	16	77	18	13.2	0	1	5	1
c3	2020-05-13 16:00:00	95	152.7272727	34.4	16	77	18	13.2	0	1	5	1
c1	2020-05-13 17:00:00	95	5.454545455	32.2	15.5	77	18	13.4	0	1	5	1
c2	2020-05-13 17:00:00	95	81.81818182	32.9	16	77	18	13.4	0	1	5	1
c3	2020-05-13 17:00:00	95	169.0909091	34.3	16	77	18	13.4	0	1	5	1
c1	2020-05-13 18:00:00	95	10.90909091	32.3	16.5	77.5	17.5	13.5	0	1	5	1
c2	2020-05-13 18:00:00	95	98.18181818	32.8	15.8	77.5	17.5	13.5	0	1	5	1
c3	2020-05-13 18:00:00	95	196.3636364	34.3	15.7	77.5	17.5	13.5	0	1	5	1
c1	2020-05-13 19:00:00	95	38.18181818	32.3	14.3	78	17	13.6	0	1	5	1
c2	2020-05-13 19:00:00	95	120	33	14.3	78	17	13.6	0	1	5	1
c3	2020-05-13 19:00:00	95	201.8181818	34.3	14	78	17	13.6	0	1	5	1
c1	2020-05-13 20:00:00	95	54.54545455	32.2	13.3	78	17	12.8	0	1	5	1
c2	2020-05-13 20:00:00	95	103.6363636	33	13.1	78	17	12.8	0	1	5	1
c3	2020-05-13 20:00:00	95	190.9090909	34.4	12.8	78	17	12.8	0	1	5	1
c1	2020-05-13 21:00:00	95	49.09090909	32.6	11	78	17	11	0	1	5	1
c2	2020-05-13 21:00:00	95	103.6363636	33.1	11.2	78	17	11	0	1	5	1
c3	2020-05-13 21:00:00	95	180	34.5	10.6	78	17	11	0	1	5	1
c1	2020-05-13 22:00:00	95	38.18181818	32.6	9.6	78	17	8.7	0	1	5	1
c2	2020-05-13 22:00:00	95	109.0909091	33	9.8	78	17	8.7	0	1	5	1
c3	2020-05-13 22:00:00	95	180	34.8	9.2	78	17	8.7	0	1	5	1
c1	2020-05-13 23:00:00	95	60	32.6	8.8	77.75	17.25	7.4	0	1	5	1
c2	2020-05-13 23:00:00	95	109.0909091	33.2	9.1	77.75	17.25	7.4	0	1	5	1
c3	2020-05-13 23:00:00	95	152.7272727	34.9	8.4	77.75	17.25	7.4	0	1	5	1
c1	2020-05-14 00:00:00	95	43.63636364	32.6	8.8	77	18	7.9	0	1	5	1
c2	2020-05-14 00:00:00	95	98.18181818	33.3	9.1	77	18	7.9	0	1	5	1
c3	2020-05-14 00:00:00	95	158.1818182	34.9	8.5	77	18	7.9	0	1	5	1
c1	2020-05-14 01:00:00	95	27.27272727	32.9	8.6	77	18	7.7	0	1	5	1
c2	2020-05-14 01:00:00	95	87.27272727	33.4	9	77	18	7.7	0	1	5	1
c3	2020-05-14 01:00:00	95	163.6363636	34.9	8.5	77	18	7.7	0	1	5	1
c1	2020-05-14 02:00:00	95	43.63636364	32.9	8.4	77	18	7.6	0	1	5	1
c2	2020-05-14 02:00:00	95	81.81818182	33.4	8.9	77	18	7.6	0	1	5	1
c3	2020-05-14 02:00:00	95	163.6363636	34.9	8.4	77	18	7.6	0	1	5	1
c1	2020-05-14 03:00:00	95	70.90909091	32.9	8.3	77	18	7.4	0	1	5	1
c2	2020-05-14 03:00:00	95	65.45454545	33.4	8.8	77	18	7.4	0	1	5	1
c3	2020-05-14 03:00:00	95	158.1818182	35	8.3	77	18	7.4	0	1	5	1
c1	2020-05-14 04:00:00	95	60	32.9	8.2	77	18	6.8	0	1	5	1
c2	2020-05-14 04:00:00	95	54.54545455	33.4	8.5	77	18	6.8	0	1	5	1
c3	2020-05-14 04:00:00	95	130.9090909	35	8.1	77	18	6.8	0	1	5	1
c1	2020-05-14 05:00:00	95	27.27272727	32.9	7.3	77	18	6.3	0	1	5	1
c2	2020-05-14 05:00:00	95	43.63636364	33.3	7.7	77	18	6.3	0	1	5	1
c3	2020-05-14 05:00:00	95	136.3636364	34.8	7.3	77	18	6.3	0	1	5	1
c1	2020-05-14 06:00:00	95	27.27272727	32.7	7.6	77	18	5.8	0	1	5	1
c2	2020-05-14 06:00:00	95	54.54545455	33.2	8.1	77	18	5.8	0	1	5	1
c3	2020-05-14 06:00:00	95	125.4545455	34.8	7.6	77	18	5.8	0	1	5	1
c1	2020-05-14 07:00:00	95	27.27272727	32.9	8.2	77	18	7.1	0	1	5	1
c2	2020-05-14 07:00:00	95	65.45454545	33.2	8.6	77	18	7.1	0	1	5	1
c3	2020-05-14 07:00:00	95	114.5454545	35	8.3	77	18	7.1	0	1	5	1
c1	2020-05-14 08:00:00	95	21.81818182	32.9	9.1	77.25	17.75	7.6	0	1	5	1
c2	2020-05-14 08:00:00	95	38.18181818	33.2	9.9	77.25	17.75	7.6	0	1	5	1
c3	2020-05-14 08:00:00	95	103.6363636	35	9.8	77.25	17.75	7.6	0	1	5	1
c1	2020-05-14 09:00:00	95	21.81818182	32.8	10.3	77	18	7.5	0.2	1	5	1
c2	2020-05-14 09:00:00	95	27.27272727	33.1	11.1	77	18	7.5	0.2	1	5	1
c3	2020-05-14 09:00:00	95	114.5454545	34.8	11.2	77	18	7.5	0.2	1	5	1
c1	2020-05-14 10:00:00	95	16.36363636	32.7	11.9	77	18	8.8	0	1	5	1
c2	2020-05-14 10:00:00	95	54.54545455	33.3	13	77	18	8.8	0	1	5	1
c3	2020-05-14 10:00:00	95	103.6363636	34.7	13.1	77	18	8.8	0	1	5	1
c1	2020-05-14 11:00:00	95	5.454545455	32.7	12	77	18	9.1	0	1	5	1
c2	2020-05-14 11:00:00	95	38.18181818	33	12.8	77	18	9.1	0	1	5	1
c3	2020-05-14 11:00:00	95	114.5454545	34.8	13.1	77	18	9.1	0	1	5	1
c1	2020-05-14 12:00:00	95	21.81818182	32.4	14.1	77	18	10.3	0	1	5	1
c2	2020-05-14 12:00:00	95	49.09090909	33	14.7	77	18	10.3	0	1	5	1
c3	2020-05-14 12:00:00	95	120	34.5	15	77	18	10.3	0	1	5	1
c1	2020-05-14 13:00:00	95	0	32.3	16.3	77.25	17.75	11.5	0	1	5	1
c2	2020-05-14 13:00:00	95	65.45454545	33.1	17.3	77.25	17.75	11.5	0	1	5	1
c3	2020-05-14 13:00:00	95	125.4545455	34.6	17.5	77.25	17.75	11.5	0	1	5	1
c1	2020-05-14 14:00:00	95	5.454545455	32.5	14.9	77	18	12.2	0	1	5	1
c2	2020-05-14 14:00:00	95	54.54545455	32.9	15.5	77	18	12.2	0	1	5	1
c3	2020-05-14 14:00:00	95	120	34.4	15.7	77	18	12.2	0	1	5	1
c1	2020-05-14 15:00:00	95	27.27272727	32.4	17.3	77	18	12.3	0	1	5	1
c2	2020-05-14 15:00:00	95	60	32.9	17.2	77	18	12.3	0	1	5	1
c3	2020-05-14 15:00:00	95	158.1818182	34.1	17.5	77	18	12.3	0	1	5	1
c1	2020-05-14 16:00:00	95	16.36363636	32	18.2	77	18	13.2	0	1	5	1
c2	2020-05-14 16:00:00	95	32.72727273	32.8	17.7	77	18	13.2	0	1	5	1
c3	2020-05-14 16:00:00	95	147.2727273	34.4	18	77	18	13.2	0	1	5	1
c1	2020-05-14 17:00:00	95	16.36363636	32.1	16.3	77	18	13.3	0	1	5	1
c2	2020-05-14 17:00:00	95	70.90909091	33	15.7	77	18	13.3	0	1	5	1
c3	2020-05-14 17:00:00	95	158.1818182	34.5	15.7	77	18	13.3	0	1	5	1
c1	2020-05-14 18:00:00	95	54.54545455	32.2	15.5	77	18	13	0	1	5	1
c2	2020-05-14 18:00:00	95	81.81818182	33	14.7	77	18	13	0	1	5	1
c3	2020-05-14 18:00:00	95	169.0909091	34.2	14.6	77	18	13	0	1	5	1
c1	2020-05-14 19:00:00	95	43.63636364	32.4	14	77	18	12.9	0	1	5	1
c2	2020-05-14 19:00:00	95	92.72727273	33.2	13.7	77	18	12.9	0	1	5	1
c3	2020-05-14 19:00:00	95	163.6363636	34.5	13.4	77	18	12.9	0	1	5	1
c1	2020-05-14 20:00:00	95	70.90909091	32.5	12.3	77	18	13	0	1	5	1
c2	2020-05-14 20:00:00	95	98.18181818	33.1	12	77	18	13	0	1	5	1
c3	2020-05-14 20:00:00	95	180	34.4	11.3	77	18	13	0	1	5	1
c1	2020-05-14 21:00:00	95	27.27272727	32.3	9.9	77	18	11.5	0	1	5	1
c2	2020-05-14 21:00:00	95	65.45454545	33.1	10.1	77	18	11.5	0	1	5	1
c3	2020-05-14 21:00:00	95	147.2727273	34.7	9.3	77	18	11.5	0	1	5	1
c1	2020-05-14 22:00:00	95	70.90909091	32.6	8.4	77	18	8.3	0	1	5	1
c2	2020-05-14 22:00:00	95	81.81818182	33.2	8.5	77	18	8.3	0	1	5	1
c3	2020-05-14 22:00:00	95	147.2727273	34.9	7.6	77	18	8.3	0	1	5	1
c1	2020-05-14 23:00:00	95	21.81818182	32.8	7	77	18	5.8	0	1	5	1
c2	2020-05-14 23:00:00	95	60	33.2	7.3	77	18	5.8	0	1	5	1
c3	2020-05-14 23:00:00	95	125.4545455	34.7	6.4	77	18	5.8	0	1	5	1
c1	2020-05-15 00:00:00	95	27.27272727	32.9	6.1	76.5	18.5	4.9	0	1	5	1
c2	2020-05-15 00:00:00	95	70.90909091	33.3	6.5	76.5	18.5	4.9	0	1	5	1
c3	2020-05-15 00:00:00	95	120	34.8	5.5	76.5	18.5	4.9	0	1	5	1
c1	2020-05-15 01:00:00	95	43.63636364	32.7	5.5	76.75	18.25	3.4	0	1	5	1
c2	2020-05-15 01:00:00	95	70.90909091	33.3	5.9	76.75	18.25	3.4	0	1	5	1
c3	2020-05-15 01:00:00	95	125.4545455	34.9	5	76.75	18.25	3.4	0	1	5	1
c1	2020-05-15 02:00:00	95	27.27272727	32.9	4.5	77	18	2.8	0	1	5	1
c2	2020-05-15 02:00:00	95	5.454545455	33.6	5	77	18	2.8	0	1	5	1
c3	2020-05-15 02:00:00	95	103.6363636	35.1	4	77	18	2.8	0	1	5	1
c1	2020-05-15 03:00:00	95	38.18181818	33	4	77	18	2.6	0	1	5	1
c2	2020-05-15 03:00:00	95	21.81818182	33.4	4.4	77	18	2.6	0	1	5	1
c3	2020-05-15 03:00:00	95	114.5454545	35.1	3.5	77	18	2.6	0	1	5	1
c1	2020-05-15 04:00:00	95	21.81818182	32.9	3.3	77	18	2.5	0	1	5	1
c2	2020-05-15 04:00:00	95	49.09090909	33.4	3.9	77	18	2.5	0	1	5	1
c3	2020-05-15 04:00:00	95	109.0909091	35.2	2.8	77	18	2.5	0	1	5	1
c1	2020-05-15 05:00:00	95	21.81818182	33	3.4	77	18	1	0	1	5	1
c2	2020-05-15 05:00:00	95	-27.27272727	33.4	3.9	77	18	1	0	1	5	1
c3	2020-05-15 05:00:00	95	65.45454545	35.2	2.9	77	18	1	0	1	5	1
c1	2020-05-15 06:00:00	95	38.18181818	33	4	77	18	1	0	1	5	1
c2	2020-05-15 06:00:00	95	103.6363636	33.5	4.4	77	18	1	0	1	5	1
c3	2020-05-15 06:00:00	95	125.4545455	35.2	3.8	77	18	1	0	1	5	1
c1	2020-05-15 07:00:00	95	27.27272727	33	4.4	77	18	4.2	0	1	5	1
c2	2020-05-15 07:00:00	95	38.18181818	33.5	5	77	18	4.2	0	1	5	1
c3	2020-05-15 07:00:00	95	98.18181818	35.2	4.4	77	18	4.2	0	1	5	1
c1	2020-05-15 08:00:00	95	38.18181818	33	5.5	77	18	7.4	0	1	5	1
c2	2020-05-15 08:00:00	95	49.09090909	33.5	8.4	77	18	7.4	0	1	5	1
c3	2020-05-15 08:00:00	95	185.4545455	34.9	8.6	77	18	7.4	0	1	5	1
c1	2020-05-15 09:00:00	95	49.09090909	32.9	7.2	77	18	9.6	0	1	5	1
c2	2020-05-15 09:00:00	95	54.54545455	33.1	13	77	18	9.6	0	1	5	1
c3	2020-05-15 09:00:00	95	130.9090909	34.8	13.5	77	18	9.6	0	1	5	1
c1	2020-05-15 10:00:00	95	60	32.6	9.6	77	18	11.2	0	1	5	1
c2	2020-05-15 10:00:00	95	27.27272727	33.1	15.7	77	18	11.2	0	1	5	1
c3	2020-05-15 10:00:00	95	163.6363636	34.3	16.2	77	18	11.2	0	1	5	1
c1	2020-05-15 11:00:00	95	81.81818182	32.7	13.5	76	19	12.3	0	1	5	1
c2	2020-05-15 11:00:00	95	87.27272727	32.8	19.1	76	19	12.3	0	1	5	1
c3	2020-05-15 11:00:00	95	147.2727273	34.4	19.7	76	19	12.3	0	1	5	1
c1	2020-05-15 12:00:00	95	27.27272727	32.3	14.1	76	19	12.7	0	1	5	1
c2	2020-05-15 12:00:00	95	76.36363636	32.9	16.5	76	19	12.7	0	1	5	1
c3	2020-05-15 12:00:00	95	136.3636364	34.1	16.8	76	19	12.7	0	1	5	1
c1	2020-05-15 13:00:00	95	54.54545455	32.2	16	76	19	13.3	0	1	5	1
c2	2020-05-15 13:00:00	95	32.72727273	33.1	17.3	76	19	13.3	0	1	5	1
c3	2020-05-15 13:00:00	95	180	34.3	17.3	76	19	13.3	0	1	5	1
c1	2020-05-15 14:00:00	95	43.63636364	32.1	15.7	76	19	13.4	0	1	5	1
c2	2020-05-15 14:00:00	95	38.18181818	33	16.3	76	19	13.4	0	1	5	1
c3	2020-05-15 14:00:00	95	212.7272727	34.3	16.5	76	19	13.4	0	1	5	1
c1	2020-05-15 15:00:00	95	76.36363636	32.5	17.3	76.75	18.25	14.1	0	1	5	1
c2	2020-05-15 15:00:00	95	38.18181818	33.3	17.3	76.75	18.25	14.1	0	1	5	1
c3	2020-05-15 15:00:00	95	250.9090909	35	17.7	76.75	18.25	14.1	0	1	5	1
c1	2020-05-15 16:00:00	95	70.90909091	32.7	17.7	77.25	17.75	14.3	0	1	5	1
c2	2020-05-15 16:00:00	95	54.54545455	33.4	17.5	77.25	17.75	14.3	0	1	5	1
c3	2020-05-15 16:00:00	95	256.3636364	35.2	17.9	77.25	17.75	14.3	0	1	5	1
c1	2020-05-15 17:00:00	95	54.54545455	33.3	17.2	77.5	17.5	15.9	0	1	5	1
c2	2020-05-15 17:00:00	95	49.09090909	34.1	16.3	77.5	17.5	15.9	0	1	5	1
c3	2020-05-15 17:00:00	95	267.2727273	36	16.8	77.5	17.5	15.9	0	1	5	1
c1	2020-05-15 18:00:00	95	60	33.6	14.1	78	17	13.9	0	1	5	1
c2	2020-05-15 18:00:00	95	27.27272727	34.8	14.1	78	17	13.9	0	1	5	1
c3	2020-05-15 18:00:00	95	305.4545455	36.8	14	78	17	13.9	0	1	5	1
c1	2020-05-15 19:00:00	95	70.90909091	34.2	12.8	79	16	12.9	0	1	5	1
c2	2020-05-15 19:00:00	95	27.27272727	35.2	13	79	16	12.9	0	1	5	1
c3	2020-05-15 19:00:00	95	267.2727273	37.4	12.7	79	16	12.9	0	1	5	1
c1	2020-05-15 20:00:00	95	81.81818182	34.4	11.7	79.75	15.25	12.4	0	1	5	1
c2	2020-05-15 20:00:00	95	27.27272727	35.2	12	79.75	15.25	12.4	0	1	5	1
c3	2020-05-15 20:00:00	95	240	37.5	11.7	79.75	15.25	12.4	0	1	5	1
c1	2020-05-15 21:00:00	95	87.27272727	34.5	11	80.5	14.5	11.7	0	1	5	1
c2	2020-05-15 21:00:00	95	43.63636364	35.6	11.2	80.5	14.5	11.7	0	1	5	1
c3	2020-05-15 21:00:00	95	250.9090909	38.1	11.1	80.5	14.5	11.7	0	1	5	1
c1	2020-05-15 22:00:00	95	76.36363636	34.4	10.4	81	14	10.8	0	1	5	1
c2	2020-05-15 22:00:00	95	54.54545455	35.8	10.8	81	14	10.8	0	1	5	1
c3	2020-05-15 22:00:00	95	234.5454545	38.2	10.6	81	14	10.8	0	1	5	1
c1	2020-05-15 23:00:00	95	65.45454545	34.5	9.9	82	13	9.6	0	1	5	1
c2	2020-05-15 23:00:00	95	70.90909091	36	10.2	82	13	9.6	0	1	5	1
c3	2020-05-15 23:00:00	95	196.3636364	38.2	9.8	82	13	9.6	0	1	5	1
c1	2020-05-16 00:00:00	95	81.81818182	34.6	9.8	82	13	10.1	0	1	5	1
c2	2020-05-16 00:00:00	95	70.90909091	36	9.9	82	13	10.1	0	1	5	1
c3	2020-05-16 00:00:00	95	207.2727273	38.3	9.7	82	13	10.1	0	1	5	1
c1	2020-05-16 01:00:00	95	65.45454545	34.5	9.7	82.75	12.25	9.8	0	1	5	1
c2	2020-05-16 01:00:00	95	76.36363636	36.3	9.8	82.75	12.25	9.8	0	1	5	1
c3	2020-05-16 01:00:00	95	174.5454545	38.9	9.6	82.75	12.25	9.8	0	1	5	1
c1	2020-05-16 02:00:00	95	87.27272727	34.8	9.5	83	12	9.4	0	1	5	1
c2	2020-05-16 02:00:00	95	54.54545455	36.5	9.7	83	12	9.4	0	1	5	1
c3	2020-05-16 02:00:00	95	174.5454545	39.1	9.5	83	12	9.4	0	1	5	1
c1	2020-05-16 03:00:00	95	60	34.8	9	83	12	8.3	0	1	5	1
c2	2020-05-16 03:00:00	95	65.45454545	36.6	9.1	83	12	8.3	0	1	5	1
c3	2020-05-16 03:00:00	95	163.6363636	39.1	8.9	83	12	8.3	0	1	5	1
c1	2020-05-16 04:00:00	95	60	34.8	8.3	83.5	11.5	6.9	0	1	5	1
c2	2020-05-16 04:00:00	95	49.09090909	36.9	8.4	83.5	11.5	6.9	0	1	5	1
c3	2020-05-16 04:00:00	95	130.9090909	39.2	8	83.5	11.5	6.9	0	1	5	1
c1	2020-05-16 05:00:00	95	54.54545455	34.9	7.5	83.75	11.25	5.7	0	1	5	1
c2	2020-05-16 05:00:00	95	38.18181818	37.1	7.5	83.75	11.25	5.7	0	1	5	1
c3	2020-05-16 05:00:00	95	120	39.6	7.1	83.75	11.25	5.7	0	1	5	1
c1	2020-05-16 06:00:00	95	49.09090909	35.1	7.1	84	11	5.3	0	1	5	1
c2	2020-05-16 06:00:00	95	38.18181818	37.8	7.2	84	11	5.3	0	1	5	1
c3	2020-05-16 06:00:00	95	130.9090909	40.3	6.6	84	11	5.3	0	1	5	1
c1	2020-05-16 07:00:00	95	27.27272727	35.2	7.8	84	11	6.8	0	1	5	1
c2	2020-05-16 07:00:00	95	-5.454545455	38.2	8	84	11	6.8	0	1	5	1
c3	2020-05-16 07:00:00	95	103.6363636	40.4	7.6	84	11	6.8	0	1	5	1
c1	2020-05-16 08:00:00	95	43.63636364	35.5	8.5	84	11	9.4	0	1	5	1
c2	2020-05-16 08:00:00	95	10.90909091	38.5	10.6	84	11	9.4	0	1	5	1
c3	2020-05-16 08:00:00	95	141.8181818	41	10.6	84	11	9.4	0	1	5	1
c1	2020-05-16 09:00:00	95	54.54545455	37.4	10.2	84	11	11.5	0	1	5	1
c2	2020-05-16 09:00:00	95	10.90909091	38.4	13.8	84	11	11.5	0	1	5	1
c3	2020-05-16 09:00:00	95	60	42.2	14.1	84	11	11.5	0	1	5	1
c1	2020-05-16 10:00:00	103	87.27272727	37	13	84.75	10.25	12.6	0	1	5	2
c2	2020-05-16 10:00:00	103	16.36363636	38.8	14.4	84.75	10.25	12.6	0	1	5	2
c3	2020-05-16 10:00:00	103	76.36363636	43.7	14.4	84.75	10.25	12.6	0	1	5	2
c1	2020-05-16 11:00:00	103	49.09090909	37	14	85	10	12.5	0	1	5	2
c2	2020-05-16 11:00:00	103	21.81818182	38.7	14.4	85	10	12.5	0	1	5	2
c3	2020-05-16 11:00:00	103	16.36363636	44.5	14.4	85	10	12.5	0	1	5	2
c1	2020-05-16 12:00:00	103	10.90909091	38.4	14	85	10	14.2	0	1	5	2
c2	2020-05-16 12:00:00	103	10.90909091	38.7	14.1	85	10	14.2	0	1	5	2
c3	2020-05-16 12:00:00	103	43.63636364	43.9	14.1	85	10	14.2	0	1	5	2
c1	2020-05-16 13:00:00	103	16.36363636	38.2	15.7	85	10	13.7	0	1	5	2
c2	2020-05-16 13:00:00	103	38.18181818	38.6	15.7	85	10	13.7	0	1	5	2
c3	2020-05-16 13:00:00	103	43.63636364	43.7	15.7	85	10	13.7	0	1	5	2
c1	2020-05-16 14:00:00	103	32.72727273	37.8	16.2	85	10	14.3	0	1	5	2
c2	2020-05-16 14:00:00	103	10.90909091	38.4	16.5	85	10	14.3	0	1	5	2
c3	2020-05-16 14:00:00	103	27.27272727	43.4	16.5	85	10	14.3	0	1	5	2
c1	2020-05-16 15:00:00	103	21.81818182	37.8	15.8	85.75	9.25	15.1	0	1	5	2
c2	2020-05-16 15:00:00	103	-5.454545455	38.6	15.8	85.75	9.25	15.1	0	1	5	2
c3	2020-05-16 15:00:00	103	38.18181818	43.5	15.7	85.75	9.25	15.1	0	1	5	2
c1	2020-05-16 16:00:00	103	27.27272727	37.6	15.7	85.75	9.25	15.3	0	1	5	2
c2	2020-05-16 16:00:00	103	-10.90909091	38.6	15.8	85.75	9.25	15.3	0	1	5	2
c3	2020-05-16 16:00:00	103	5.454545455	43.3	15.5	85.75	9.25	15.3	0	1	5	2
c1	2020-05-16 17:00:00	103	16.36363636	37.6	15.8	86	9	16.4	0	1	5	2
c2	2020-05-16 17:00:00	103	21.81818182	38.6	15.5	86	9	16.4	0	1	5	2
c3	2020-05-16 17:00:00	103	0	43.6	15.4	86	9	16.4	0	1	5	2
c1	2020-05-16 18:00:00	103	-16.36363636	37.7	16	86	9	16.4	0	1	5	2
c2	2020-05-16 18:00:00	103	5.454545455	38.8	14.7	86	9	16.4	0	1	5	2
c3	2020-05-16 18:00:00	103	5.454545455	43.6	14.7	86	9	16.4	0	1	5	2
c1	2020-05-16 19:00:00	103	0	37.8	15	86	9	15.6	0	1	5	2
c2	2020-05-16 19:00:00	103	5.454545455	39	14.1	86	9	15.6	0	1	5	2
c3	2020-05-16 19:00:00	103	-10.90909091	43.7	14	86	9	15.6	0	1	5	2
c1	2020-05-16 20:00:00	103	16.36363636	38	14.3	86	9	15.4	0	1	5	2
c2	2020-05-16 20:00:00	103	10.90909091	39	13.4	86	9	15.4	0	1	5	2
c3	2020-05-16 20:00:00	103	-10.90909091	44.1	13.1	86	9	15.4	0	1	5	2
c1	2020-05-16 21:00:00	103	485.4545455	17.6	13.4	86	9	13.3	0	1	5	2
c2	2020-05-16 21:00:00	103	240	4.3	13.8	86	9	13.3	0	1	5	2
c3	2020-05-16 21:00:00	103	256.3636364	11.3	13.5	86	9	13.3	0	1	5	2
c1	2020-05-16 22:00:00	103	441.8181818	17.4	12.6	86	9	11	0	1	5	2
c2	2020-05-16 22:00:00	103	218.1818182	4.3	13	86	9	11	0	1	5	2
c3	2020-05-16 22:00:00	103	223.6363636	11.4	12.6	86	9	11	0	1	5	2
c1	2020-05-16 23:00:00	103	414.5454545	17.6	12.1	86	9	11.9	0	1	5	2
c2	2020-05-16 23:00:00	103	125.4545455	4.5	12.7	86	9	11.9	0	1	5	2
c3	2020-05-16 23:00:00	103	180	11.4	12.1	86	9	11.9	0	1	5	2
c1	2020-05-17 00:00:00	103	469.0909091	17.5	11.2	86	9	11.4	0	1	5	2
c2	2020-05-17 00:00:00	103	234.5454545	4.2	11.7	86	9	11.4	0	1	5	2
c3	2020-05-17 00:00:00	103	261.8181818	11.4	11.2	86	9	11.4	0	1	5	2
c1	2020-05-17 01:00:00	103	447.2727273	17.7	11.3	86	9	11.3	0	1	5	2
c2	2020-05-17 01:00:00	103	245.4545455	4.5	11.9	86	9	11.3	0	1	5	2
c3	2020-05-17 01:00:00	103	310.9090909	11.4	11.2	86	9	11.3	0	1	5	2
c1	2020-05-17 02:00:00	103	420	17.7	11.5	86	9	10.5	0	1	5	2
c2	2020-05-17 02:00:00	103	218.1818182	4.2	12	86	9	10.5	0	1	5	2
c3	2020-05-17 02:00:00	103	261.8181818	11.3	11.5	86	9	10.5	0	1	5	2
c1	2020-05-17 03:00:00	103	436.3636364	17.5	11.2	86	9	9.5	0	1	5	2
c2	2020-05-17 03:00:00	103	185.4545455	4.2	11.9	86	9	9.5	0	1	5	2
c3	2020-05-17 03:00:00	103	240	11.4	11.3	86	9	9.5	0	1	5	2
c1	2020-05-17 04:00:00	103	403.6363636	17.5	11.1	86	9	9.6	0	1	5	2
c2	2020-05-17 04:00:00	103	174.5454545	4.2	11.7	86	9	9.6	0	1	5	2
c3	2020-05-17 04:00:00	103	256.3636364	11.4	11.2	86	9	9.6	0	1	5	2
c1	2020-05-17 05:00:00	103	387.2727273	17.6	10.8	86	9	9.4	0	1	5	2
c2	2020-05-17 05:00:00	103	141.8181818	4.4	11.5	86	9	9.4	0	1	5	2
c3	2020-05-17 05:00:00	103	240	11.4	11	86	9	9.4	0	1	5	2
c1	2020-05-17 06:00:00	103	409.0909091	17.6	11.1	86	9	9.4	0	1	5	2
c2	2020-05-17 06:00:00	103	185.4545455	4.4	11.6	86	9	9.4	0	1	5	2
c3	2020-05-17 06:00:00	103	300	11.7	11.2	86	9	9.4	0	1	5	2
c1	2020-05-17 07:00:00	103	420	17.6	10.7	86	9	9.3	0	1	5	2
c2	2020-05-17 07:00:00	103	174.5454545	3.9	11.5	86	9	9.3	0	1	5	2
c3	2020-05-17 07:00:00	103	261.8181818	11.4	10.8	86	9	9.3	0	1	5	2
c1	2020-05-17 08:00:00	103	425.4545455	17.6	11	86	9	10.9	0	1	5	2
c2	2020-05-17 08:00:00	103	180	3.9	11.6	86	9	10.9	0	1	5	2
c3	2020-05-17 08:00:00	103	278.1818182	11.7	11.1	86	9	10.9	0	1	5	2
c1	2020-05-17 09:00:00	103	409.0909091	17.5	12.3	85.75	9.25	11.8	0	1	5	2
c2	2020-05-17 09:00:00	103	212.7272727	4.2	15.7	85.75	9.25	11.8	0	1	5	2
c3	2020-05-17 09:00:00	103	272.7272727	11.5	12.3	85.75	9.25	11.8	0	1	5	2
c1	2020-05-17 10:00:00	103	458.1818182	17.7	14	85.25	9.75	12.7	0	1	5	2
c2	2020-05-17 10:00:00	103	250.9090909	4	17.9	85.25	9.75	12.7	0	1	5	2
c3	2020-05-17 10:00:00	103	338.1818182	11.5	13.5	85.25	9.75	12.7	0	1	5	2
c1	2020-05-17 11:00:00	103	490.9090909	17.8	16.3	85	10	13.9	0	1	5	2
c2	2020-05-17 11:00:00	103	316.3636364	4.3	20.1	85	10	13.9	0	1	5	2
c3	2020-05-17 11:00:00	103	420	11.6	14.9	85	10	13.9	0	1	5	2
c1	2020-05-17 12:00:00	103	523.6363636	17.7	18.8	85	10	15.2	0	1	5	2
c2	2020-05-17 12:00:00	103	310.9090909	4	21.3	85	10	15.2	0	1	5	2
c3	2020-05-17 12:00:00	103	420	11.7	19.3	85	10	15.2	0	1	5	2
c1	2020-05-17 13:00:00	103	567.2727273	17.7	21.9	85	10	15.7	0	1	5	2
c2	2020-05-17 13:00:00	103	316.3636364	4.3	22.1	85	10	15.7	0	1	5	2
c3	2020-05-17 13:00:00	103	289.0909091	11.7	22.1	85	10	15.7	0	1	5	2
c1	2020-05-17 14:00:00	103	556.3636364	17.5	23.7	85	10	16.5	0	1	5	2
c2	2020-05-17 14:00:00	103	365.4545455	4.5	22.1	85	10	16.5	0	1	5	2
c3	2020-05-17 14:00:00	103	540	11.8	23.9	85	10	16.5	0	1	5	2
c1	2020-05-17 15:00:00	103	660	17.4	25.4	85	10	18	0	1	5	2
c2	2020-05-17 15:00:00	103	447.2727273	4.5	20.5	85	10	18	0	1	5	2
c3	2020-05-17 15:00:00	103	496.3636364	11.6	25.1	85	10	18	0	1	5	2
c1	2020-05-17 16:00:00	103	561.8181818	17.4	21.5	85	10	18	0	1	5	2
c2	2020-05-17 16:00:00	103	360	3.6	19.1	85	10	18	0	1	5	2
c3	2020-05-17 16:00:00	103	414.5454545	11.5	20.9	85	10	18	0	1	5	2
c1	2020-05-17 17:00:00	103	578.1818182	17.5	22.4	85	10	18.3	0	1	5	2
c2	2020-05-17 17:00:00	103	381.8181818	4.2	19.1	85	10	18.3	0	1	5	2
c3	2020-05-17 17:00:00	103	469.0909091	11.3	20.9	85	10	18.3	0	1	5	2
c1	2020-05-17 18:00:00	103	594.5454545	17.6	21.9	85	10	18.3	0	1	5	2
c2	2020-05-17 18:00:00	103	360	3.9	19.1	85	10	18.3	0	1	5	2
c3	2020-05-17 18:00:00	103	469.0909091	11.7	20.1	85	10	18.3	0	1	5	2
c1	2020-05-17 19:00:00	103	529.0909091	17.5	18.4	85	10	17.6	0	1	5	2
c2	2020-05-17 19:00:00	103	338.1818182	3.9	18.8	85	10	17.6	0	1	5	2
c3	2020-05-17 19:00:00	103	447.2727273	11.4	18.6	85	10	17.6	0	1	5	2
c1	2020-05-17 20:00:00	103	518.1818182	17.4	16.7	84.5	10.5	16.5	0	1	5	2
c2	2020-05-17 20:00:00	103	283.6363636	3.6	17	84.5	10.5	16.5	0	1	5	2
c3	2020-05-17 20:00:00	103	332.7272727	11.3	17	84.5	10.5	16.5	0	1	5	2
c1	2020-05-17 21:00:00	103	469.0909091	17.6	15	84	11	15	0	1	5	2
c2	2020-05-17 21:00:00	103	245.4545455	3.8	15.5	84	11	15	0	1	5	2
c3	2020-05-17 21:00:00	103	305.4545455	11.4	15.4	84	11	15	0	1	5	2
c1	2020-05-17 22:00:00	103	441.8181818	17.8	13.8	84	11	13.5	0	1	5	2
c2	2020-05-17 22:00:00	103	229.0909091	3.5	14.4	84	11	13.5	0	1	5	2
c3	2020-05-17 22:00:00	103	338.1818182	11.6	14.1	84	11	13.5	0	1	5	2
c1	2020-05-17 23:00:00	103	392.7272727	17.2	13	84	11	13	0	1	5	2
c2	2020-05-17 23:00:00	103	218.1818182	3.5	13.5	84	11	13	0	1	5	2
c3	2020-05-17 23:00:00	103	261.8181818	11.1	13.3	84	11	13	0	1	5	2
c1	2020-05-18 00:00:00	103	430.9090909	17.5	12.3	84	11	12.5	0	1	5	2
c2	2020-05-18 00:00:00	103	201.8181818	4	12.8	84	11	12.5	0	1	5	2
c3	2020-05-18 00:00:00	103	256.3636364	11.5	12.4	84	11	12.5	0	1	5	2
c1	2020-05-18 01:00:00	103	414.5454545	17.2	12	84	11	11.8	0	1	5	2
c2	2020-05-18 01:00:00	103	212.7272727	4	12.6	84	11	11.8	0	1	5	2
c3	2020-05-18 01:00:00	103	218.1818182	11.3	12.1	84	11	11.8	0	1	5	2
c1	2020-05-18 02:00:00	103	414.5454545	17.4	11.1	83.5	11.5	10.9	0	1	5	2
c2	2020-05-18 02:00:00	103	180	3.5	11.7	83.5	11.5	10.9	0	1	5	2
c3	2020-05-18 02:00:00	103	245.4545455	11.2	11.3	83.5	11.5	10.9	0	1	5	2
c1	2020-05-18 03:00:00	103	360	17.3	11	83	12	10.3	0	1	5	2
c2	2020-05-18 03:00:00	103	190.9090909	3.5	11.5	83	12	10.3	0	1	5	2
c3	2020-05-18 03:00:00	103	234.5454545	11.4	11.1	83	12	10.3	0	1	5	2
c1	2020-05-18 04:00:00	103	387.2727273	17.2	10.4	83	12	9.7	0	1	5	2
c2	2020-05-18 04:00:00	103	190.9090909	4	11.1	83	12	9.7	0	1	5	2
c3	2020-05-18 04:00:00	103	256.3636364	11.2	10.6	83	12	9.7	0	1	5	2
c1	2020-05-18 05:00:00	103	376.3636364	17.2	10.2	83	12	10.1	0	1	5	2
c2	2020-05-18 05:00:00	103	163.6363636	3.7	10.8	83	12	10.1	0	1	5	2
c3	2020-05-18 05:00:00	103	218.1818182	11.2	10.3	83	12	10.1	0	1	5	2
c1	2020-05-18 06:00:00	103	376.3636364	17.4	10.4	83	12	10.3	0	1	5	2
c2	2020-05-18 06:00:00	103	152.7272727	3.5	11.1	83	12	10.3	0	1	5	2
c3	2020-05-18 06:00:00	103	234.5454545	10.9	10.6	83	12	10.3	0	1	5	2
c1	2020-05-18 07:00:00	103	398.1818182	17.4	11.7	83	12	11.3	0	1	5	2
c2	2020-05-18 07:00:00	103	190.9090909	3.7	12.4	83	12	11.3	0	1	5	2
c3	2020-05-18 07:00:00	103	229.0909091	11.3	11.9	83	12	11.3	0	1	5	2
c1	2020-05-18 08:00:00	103	420	17.4	12.8	82.5	12.5	13.1	0	1	5	2
c2	2020-05-18 08:00:00	103	163.6363636	3.7	13.5	82.5	12.5	13.1	0	1	5	2
c3	2020-05-18 08:00:00	103	180	11.4	13	82.5	12.5	13.1	0	1	5	2
c1	2020-05-18 09:00:00	103	420	17.3	14.9	82	13	14.8	0	1	5	2
c2	2020-05-18 09:00:00	103	190.9090909	3.8	18.4	82	13	14.8	0	1	5	2
c3	2020-05-18 09:00:00	103	201.8181818	11	14.9	82	13	14.8	0	1	5	2
c1	2020-05-18 10:00:00	103	458.1818182	17	16.7	82	13	16.4	0	1	5	2
c2	2020-05-18 10:00:00	103	283.6363636	3.8	19.1	82	13	16.4	0	1	5	2
c3	2020-05-18 10:00:00	103	267.2727273	11.2	16.5	82	13	16.4	0	1	5	2
c1	2020-05-18 11:00:00	103	501.8181818	17.3	19.1	82	13	18.1	0	1	5	2
c2	2020-05-18 11:00:00	103	338.1818182	3.8	21.9	82	13	18.1	0	1	5	2
c3	2020-05-18 11:00:00	103	425.4545455	11.1	18.4	82	13	18.1	0	1	5	2
c1	2020-05-18 12:00:00	103	534.5454545	17	21.1	81.5	13.5	18.9	0	1	5	2
c2	2020-05-18 12:00:00	103	343.6363636	3.5	22.8	81.5	13.5	18.9	0	1	5	2
c3	2020-05-18 12:00:00	103	447.2727273	10.9	21.5	81.5	13.5	18.9	0	1	5	2
c1	2020-05-18 13:00:00	103	600	16.9	23.7	81	14	19.7	0	1	5	2
c2	2020-05-18 13:00:00	103	414.5454545	3.8	24.2	81	14	19.7	0	1	5	2
c3	2020-05-18 13:00:00	103	550.9090909	11	24.2	81	14	19.7	0	1	5	2
c1	2020-05-18 14:00:00	103	638.1818182	17	24.9	81	14	20.7	0	1	5	2
c2	2020-05-18 14:00:00	103	425.4545455	3.5	23.9	81	14	20.7	0	1	5	2
c3	2020-05-18 14:00:00	103	583.6363636	10.8	25.1	81	14	20.7	0	1	5	2
c1	2020-05-18 15:00:00	103	676.3636364	16.7	26.2	81	14	21.8	0	1	5	2
c2	2020-05-18 15:00:00	103	529.0909091	3.5	22.6	81	14	21.8	0	1	5	2
c3	2020-05-18 15:00:00	103	589.0909091	10.8	25.9	81	14	21.8	0	1	5	2
c1	2020-05-18 16:00:00	103	687.2727273	16.7	26.9	81	14	22.4	0	1	5	2
c2	2020-05-18 16:00:00	103	485.4545455	3.4	22.6	81	14	22.4	0	1	5	2
c3	2020-05-18 16:00:00	103	654.5454545	10.8	26.2	81	14	22.4	0	1	5	2
c1	2020-05-18 17:00:00	103	643.6363636	16.7	24.2	80.5	14.5	22.3	0	1	5	2
c2	2020-05-18 17:00:00	103	447.2727273	2.8	22.6	80.5	14.5	22.3	0	1	5	2
c3	2020-05-18 17:00:00	103	458.1818182	10.8	23.9	80.5	14.5	22.3	0	1	5	2
c1	2020-05-18 18:00:00	103	627.2727273	16.7	21.9	80	15	22.2	0	1	5	2
c2	2020-05-18 18:00:00	103	392.7272727	3.4	21.7	80	15	22.2	0	1	5	2
c3	2020-05-18 18:00:00	103	523.6363636	10.7	22.1	80	15	22.2	0	1	5	2
c1	2020-05-18 19:00:00	103	632.7272727	16.7	21.5	80	15	21.7	0	1	5	2
c2	2020-05-18 19:00:00	103	398.1818182	3	21.9	80	15	21.7	0	1	5	2
c3	2020-05-18 19:00:00	103	485.4545455	10.5	21.7	80	15	21.7	0	1	5	2
c1	2020-05-18 20:00:00	103	616.3636364	16.7	19.5	80	15	20.1	0	1	5	2
c2	2020-05-18 20:00:00	103	310.9090909	3	19.9	80	15	20.1	0	1	5	2
c3	2020-05-18 20:00:00	103	354.5454545	10.4	19.5	80	15	20.1	0	1	5	2
c1	2020-05-18 21:00:00	103	561.8181818	16.6	18	80	15	18.1	0	1	5	2
c2	2020-05-18 21:00:00	103	305.4545455	3	18.6	80	15	18.1	0	1	5	2
c3	2020-05-18 21:00:00	103	381.8181818	10.6	18.2	80	15	18.1	0	1	5	2
c1	2020-05-18 22:00:00	103	567.2727273	16.5	16.7	80	15	16.9	0	1	5	2
c2	2020-05-18 22:00:00	103	272.7272727	3	17.3	80	15	16.9	0	1	5	2
c3	2020-05-18 22:00:00	103	327.2727273	10.3	16.8	80	15	16.9	0	1	5	2
c1	2020-05-18 23:00:00	103	540	16.6	16	80	15	15.5	0	1	5	2
c2	2020-05-18 23:00:00	103	261.8181818	2.7	16.7	80	15	15.5	0	1	5	2
c3	2020-05-18 23:00:00	103	332.7272727	10.3	16.2	80	15	15.5	0	1	5	2
c1	2020-05-19 00:00:00	103	556.3636364	16.7	15.2	79.75	15.25	16.2	0	1	5	2
c2	2020-05-19 00:00:00	103	229.0909091	3.3	15.8	79.75	15.25	16.2	0	1	5	2
c3	2020-05-19 00:00:00	103	300	10.4	15.4	79.75	15.25	16.2	0	1	5	2
c1	2020-05-19 01:00:00	103	496.3636364	16.7	14.4	79.25	15.75	14.1	0	1	5	2
c2	2020-05-19 01:00:00	103	229.0909091	3	15.2	79.25	15.75	14.1	0	1	5	2
c3	2020-05-19 01:00:00	103	370.9090909	10.6	14.6	79.25	15.75	14.1	0	1	5	2
c1	2020-05-19 02:00:00	103	534.5454545	16.5	13.5	79.25	15.75	12	0	1	5	2
c2	2020-05-19 02:00:00	103	234.5454545	3	14.3	79.25	15.75	12	0	1	5	2
c3	2020-05-19 02:00:00	103	305.4545455	10.3	13.8	79.25	15.75	12	0	1	5	2
c1	2020-05-19 03:00:00	103	512.7272727	16.4	13.1	79	16	11.6	0	1	5	2
c2	2020-05-19 03:00:00	103	196.3636364	2.9	13.8	79	16	11.6	0	1	5	2
c3	2020-05-19 03:00:00	103	283.6363636	10.3	13.3	79	16	11.6	0	1	5	2
c1	2020-05-19 04:00:00	103	496.3636364	16.4	12.8	79	16	10.8	0	1	5	2
c2	2020-05-19 04:00:00	103	190.9090909	2.9	13.5	79	16	10.8	0	1	5	2
c3	2020-05-19 04:00:00	103	316.3636364	10.1	13	79	16	10.8	0	1	5	2
c1	2020-05-19 05:00:00	103	507.2727273	16.5	12.4	79	16	10.3	0	1	5	2
c2	2020-05-19 05:00:00	103	223.6363636	2.9	13	79	16	10.3	0	1	5	2
c3	2020-05-19 05:00:00	103	327.2727273	10.1	12.6	79	16	10.3	0	1	5	2
c1	2020-05-19 06:00:00	103	501.8181818	16.3	12.6	79	16	10.9	0	1	5	2
c2	2020-05-19 06:00:00	103	240	2.9	13.1	79	16	10.9	0	1	5	2
c3	2020-05-19 06:00:00	103	403.6363636	10.2	12.7	79	16	10.9	0	1	5	2
c1	2020-05-19 07:00:00	103	507.2727273	16.5	13.5	78.25	16.75	12.1	0	1	5	2
c2	2020-05-19 07:00:00	103	234.5454545	3	14.4	78.25	16.75	12.1	0	1	5	2
c3	2020-05-19 07:00:00	103	349.0909091	10.3	13.8	78.25	16.75	12.1	0	1	5	2
c1	2020-05-19 08:00:00	103	496.3636364	16.3	14.1	78	17	13.4	0	1	5	2
c2	2020-05-19 08:00:00	103	272.7272727	3	14.9	78	17	13.4	0	1	5	2
c3	2020-05-19 08:00:00	103	392.7272727	10.3	14.3	78	17	13.4	0	1	5	2
c1	2020-05-19 09:00:00	103	496.3636364	16.2	15.7	78	17	14.1	0	1	5	2
c2	2020-05-19 09:00:00	103	289.0909091	3	16.3	78	17	14.1	0	1	5	2
c3	2020-05-19 09:00:00	103	430.9090909	10.3	15.8	78	17	14.1	0	1	5	2
c1	2020-05-19 10:00:00	103	567.2727273	16.4	17.2	78	17	15.6	0	1	5	2
c2	2020-05-19 10:00:00	103	316.3636364	3	19.3	78	17	15.6	0	1	5	2
c3	2020-05-19 10:00:00	103	409.0909091	10.3	17	78	17	15.6	0	1	5	2
c1	2020-05-19 11:00:00	103	583.6363636	16.3	19.7	78	17	16.4	0	1	5	2
c2	2020-05-19 11:00:00	103	321.8181818	3	21.1	78	17	16.4	0	1	5	2
c3	2020-05-19 11:00:00	103	425.4545455	10.4	19.3	78	17	16.4	0	1	5	2
c1	2020-05-19 12:00:00	103	660	16.2	20.5	78	17	17.1	0	1	5	2
c2	2020-05-19 12:00:00	103	343.6363636	3.3	21.1	78	17	17.1	0	1	5	2
c3	2020-05-19 12:00:00	103	496.3636364	10.4	20.5	78	17	17.1	0	1	5	2
c1	2020-05-19 13:00:00	103	676.3636364	16.2	22.4	78	17	18.4	0	1	5	2
c2	2020-05-19 13:00:00	103	392.7272727	3	22.4	78	17	18.4	0	1	5	2
c3	2020-05-19 13:00:00	103	523.6363636	10.2	22.6	78	17	18.4	0	1	5	2
c1	2020-05-19 14:00:00	103	714.5454545	16.1	23.5	77.25	17.75	19.6	0	1	5	2
c2	2020-05-19 14:00:00	103	387.2727273	3	22.8	77.25	17.75	19.6	0	1	5	2
c3	2020-05-19 14:00:00	103	534.5454545	10.2	23.9	77.25	17.75	19.6	0	1	5	2
c1	2020-05-19 15:00:00	103	725.4545455	16.1	23.5	77	18	20.3	0	1	5	2
c2	2020-05-19 15:00:00	103	452.7272727	2.7	22.4	77	18	20.3	0	1	5	2
c3	2020-05-19 15:00:00	103	730.9090909	9.8	23.9	77	18	20.3	0	1	5	2
c1	2020-05-19 16:00:00	103	643.6363636	15.9	21.1	77	18	19.7	0	1	5	2
c2	2020-05-19 16:00:00	103	349.0909091	2.7	20.9	77	18	19.7	0	1	5	2
c3	2020-05-19 16:00:00	103	469.0909091	10.1	21.5	77	18	19.7	0	1	5	2
c1	2020-05-19 17:00:00	103	649.0909091	16.1	20.9	77	18	19.2	0	1	5	2
c2	2020-05-19 17:00:00	103	338.1818182	3.3	21.1	77	18	19.2	0	1	5	2
c3	2020-05-19 17:00:00	103	529.0909091	9.8	21.1	77	18	19.2	0	1	5	2
c1	2020-05-19 18:00:00	103	621.8181818	15.8	19.9	77	18	19	0	1	5	2
c2	2020-05-19 18:00:00	103	332.7272727	3.3	19.9	77	18	19	0	1	5	2
c3	2020-05-19 18:00:00	103	490.9090909	9.8	19.9	77	18	19	0	1	5	2
c1	2020-05-19 19:00:00	103	670.9090909	15.9	19.7	76.75	18.25	19	0	1	5	2
c2	2020-05-19 19:00:00	103	332.7272727	3.3	20.7	76.75	18.25	19	0	1	5	2
c3	2020-05-19 19:00:00	103	398.1818182	9.8	20.1	76.75	18.25	19	0	1	5	2
c1	2020-05-19 20:00:00	103	610.9090909	15.8	18.2	76	19	18.6	0	1	5	2
c2	2020-05-19 20:00:00	103	305.4545455	2.9	18.8	76	19	18.6	0	1	5	2
c3	2020-05-19 20:00:00	103	436.3636364	10.1	18.6	76	19	18.6	0	1	5	2
c1	2020-05-19 21:00:00	103	610.9090909	15.6	17.2	76	19	16.3	0	1	5	2
c2	2020-05-19 21:00:00	103	283.6363636	2.9	17.7	76	19	16.3	0	1	5	2
c3	2020-05-19 21:00:00	103	381.8181818	9.6	17.3	76	19	16.3	0	1	5	2
c1	2020-05-19 22:00:00	103	594.5454545	15.7	16.8	76	19	15.5	0	1	5	2
c2	2020-05-19 22:00:00	103	245.4545455	2.9	17.3	76	19	15.5	0	1	5	2
c3	2020-05-19 22:00:00	103	381.8181818	9.6	17	76	19	15.5	0	1	5	2
c1	2020-05-19 23:00:00	103	545.4545455	15.8	16.5	75.25	19.75	15.3	0	1	5	2
c2	2020-05-19 23:00:00	103	272.7272727	2.9	17.2	75.25	19.75	15.3	0	1	5	2
c3	2020-05-19 23:00:00	103	365.4545455	9.8	16.8	75.25	19.75	15.3	0	1	5	2
c1	2020-05-20 00:00:00	103	583.6363636	15.5	16.3	75	20	15.3	0	1	5	2
c2	2020-05-20 00:00:00	103	272.7272727	2.9	16.8	75	20	15.3	0	1	5	2
c3	2020-05-20 00:00:00	103	392.7272727	9.3	16.5	75	20	15.3	0	1	5	2
c1	2020-05-20 01:00:00	103	567.2727273	15.6	15.8	75	20	15.2	0	1	5	2
c2	2020-05-20 01:00:00	103	267.2727273	2.6	16.5	75	20	15.2	0	1	5	2
c3	2020-05-20 01:00:00	103	376.3636364	9.5	16	75	20	15.2	0	1	5	2
c1	2020-05-20 02:00:00	103	550.9090909	15.6	15.2	75	20	14.5	0	1	5	2
c2	2020-05-20 02:00:00	103	245.4545455	2.6	15.8	75	20	14.5	0	1	5	2
c3	2020-05-20 02:00:00	103	338.1818182	9.5	15.4	75	20	14.5	0	1	5	2
c1	2020-05-20 03:00:00	103	545.4545455	15.6	15.4	75	20	14	0	1	5	2
c2	2020-05-20 03:00:00	103	278.1818182	2.6	16	75	20	14	0	1	5	2
c3	2020-05-20 03:00:00	103	387.2727273	9.3	15.5	75	20	14	0	1	5	2
c1	2020-05-20 04:00:00	103	583.6363636	15.7	15	75	20	14.5	0	1	5	2
c2	2020-05-20 04:00:00	103	245.4545455	3.2	15.7	75	20	14.5	0	1	5	2
c3	2020-05-20 04:00:00	103	343.6363636	9.4	15.4	75	20	14.5	0	1	5	2
c1	2020-05-20 05:00:00	103	550.9090909	15.8	14.7	75	20	14.3	0	1	5	2
c2	2020-05-20 05:00:00	103	240	2.6	15.4	75	20	14.3	0	1	5	2
c3	2020-05-20 05:00:00	103	343.6363636	9.4	14.9	75	20	14.3	0	1	5	2
c1	2020-05-20 06:00:00	103	567.2727273	15.5	14.6	74.75	20.25	13.7	0	1	5	2
c2	2020-05-20 06:00:00	103	250.9090909	2.6	15.2	74.75	20.25	13.7	0	1	5	2
c3	2020-05-20 06:00:00	103	365.4545455	9.4	14.9	74.75	20.25	13.7	0	1	5	2
c1	2020-05-20 07:00:00	103	550.9090909	15.6	15	74.75	20.25	14	0	1	5	2
c2	2020-05-20 07:00:00	103	234.5454545	3.2	15.7	74.75	20.25	14	0	1	5	2
c3	2020-05-20 07:00:00	103	349.0909091	9.4	15.2	74.75	20.25	14	0	1	5	2
c1	2020-05-20 08:00:00	103	583.6363636	15.6	15.8	74	21	14.2	0	1	5	2
c2	2020-05-20 08:00:00	103	261.8181818	2.6	16.5	74	21	14.2	0	1	5	2
c3	2020-05-20 08:00:00	103	392.7272727	9.8	16.2	74	21	14.2	0	1	5	2
c1	2020-05-20 09:00:00	103	600	15.4	17.7	74.25	20.75	14.8	0	1	5	2
c2	2020-05-20 09:00:00	103	278.1818182	2.7	18.4	74.25	20.75	14.8	0	1	5	2
c3	2020-05-20 09:00:00	103	392.7272727	9.2	18.2	74.25	20.75	14.8	0	1	5	2
c1	2020-05-20 10:00:00	85	32.72727273	25.9	18.9	74	11	15.6	0	1	5	3
c2	2020-05-20 10:00:00	85	114.5454545	30.9	20.1	74	11	15.6	0	1	5	3
c3	2020-05-20 10:00:00	85	103.6363636	44.7	20.1	74	11	15.6	0	1	5	3
c1	2020-05-20 11:00:00	85	54.54545455	25.8	20.3	74	11	16.4	0	1	5	3
c2	2020-05-20 11:00:00	85	103.6363636	30.4	20.9	74	11	16.4	0	1	5	3
c3	2020-05-20 11:00:00	85	81.81818182	44.7	20.9	74	11	16.4	0	1	5	3
c1	2020-05-20 12:00:00	85	54.54545455	25.7	21.9	74	11	16.6	0	1	5	3
c2	2020-05-20 12:00:00	85	130.9090909	30.5	22.4	74	11	16.6	0	1	5	3
c3	2020-05-20 12:00:00	85	103.6363636	44.6	22.1	74	11	16.6	0	1	5	3
c1	2020-05-20 13:00:00	85	60	25.6	23.3	74	11	18.3	0	1	5	3
c2	2020-05-20 13:00:00	85	125.4545455	30.4	23.3	74	11	18.3	0	1	5	3
c3	2020-05-20 13:00:00	85	136.3636364	44.6	23.9	74	11	18.3	0	1	5	3
c1	2020-05-20 14:00:00	85	60	25.5	24.4	74	11	19.5	0	1	5	3
c2	2020-05-20 14:00:00	85	130.9090909	30.1	24.2	74	11	19.5	0	1	5	3
c3	2020-05-20 14:00:00	85	141.8181818	44.5	24.9	74	11	19.5	0	1	5	3
c1	2020-05-20 15:00:00	85	81.81818182	25.2	24.7	74	11	20.2	0	1	5	3
c2	2020-05-20 15:00:00	85	98.18181818	30.1	23.9	74	11	20.2	0	1	5	3
c3	2020-05-20 15:00:00	85	147.2727273	44.2	23.9	74	11	20.2	0	1	5	3
c1	2020-05-20 16:00:00	85	70.90909091	25.7	23.9	74	11	21	0	1	5	3
c2	2020-05-20 16:00:00	85	158.1818182	30.2	23.3	74	11	21	0	1	5	3
c3	2020-05-20 16:00:00	85	136.3636364	44.5	22.6	74	11	21	0	1	5	3
c1	2020-05-20 17:00:00	85	98.18181818	25.3	25.9	74	11	20.3	0	1	5	3
c2	2020-05-20 17:00:00	85	174.5454545	30.2	24.4	74	11	20.3	0	1	5	3
c3	2020-05-20 17:00:00	85	158.1818182	44.5	22.4	74	11	20.3	0	1	5	3
c1	2020-05-20 18:00:00	85	81.81818182	25.5	22.1	74	11	20.2	0	1	5	3
c2	2020-05-20 18:00:00	85	147.2727273	30.1	21.1	74	11	20.2	0	1	5	3
c3	2020-05-20 18:00:00	85	141.8181818	44.6	20.3	74	11	20.2	0	1	5	3
c1	2020-05-20 19:00:00	85	98.18181818	25.6	21.9	74	11	19.3	0	1	5	3
c2	2020-05-20 19:00:00	85	141.8181818	30.3	19.7	74	11	19.3	0	1	5	3
c3	2020-05-20 19:00:00	85	125.4545455	44.7	19.1	74	11	19.3	0	1	5	3
c1	2020-05-20 20:00:00	85	81.81818182	25.7	19.5	74	11	18.8	0	1	5	3
c2	2020-05-20 20:00:00	85	125.4545455	30.4	18.2	74	11	18.8	0	1	5	3
c3	2020-05-20 20:00:00	85	125.4545455	44.9	17.7	74	11	18.8	0	1	5	3
c1	2020-05-20 21:00:00	85	76.36363636	25.9	16.8	74	11	17	0	1	5	3
c2	2020-05-20 21:00:00	85	81.81818182	30.4	16.2	74	11	17	0	1	5	3
c3	2020-05-20 21:00:00	85	103.6363636	45	15.7	74	11	17	0	1	5	3
c1	2020-05-20 22:00:00	85	60	26	15.2	74	11	14.8	0	1	5	3
c2	2020-05-20 22:00:00	85	87.27272727	30.5	14.9	74	11	14.8	0	1	5	3
c3	2020-05-20 22:00:00	85	92.72727273	45	14.3	74	11	14.8	0	1	5	3
c1	2020-05-20 23:00:00	85	49.09090909	25.8	14	74	11	12.3	0	1	5	3
c2	2020-05-20 23:00:00	85	60	30.7	13.8	74	11	12.3	0	1	5	3
c3	2020-05-20 23:00:00	85	76.36363636	45.3	13.1	74	11	12.3	0	1	5	3
c1	2020-05-21 00:00:00	85	54.54545455	26	13.1	74	11	14.2	0	1	5	3
c2	2020-05-21 00:00:00	85	92.72727273	30.9	13.1	74	11	14.2	0	1	5	3
c3	2020-05-21 00:00:00	85	70.90909091	45.3	12.4	74	11	14.2	0	1	5	3
c1	2020-05-21 01:00:00	85	65.45454545	26	12.1	74	11	13.5	0	1	5	3
c2	2020-05-21 01:00:00	85	49.09090909	30.9	12.3	74	11	13.5	0	1	5	3
c3	2020-05-21 01:00:00	85	70.90909091	45.2	11.6	74	11	13.5	0	1	5	3
c1	2020-05-21 02:00:00	85	81.81818182	26	11.2	74	11	10.2	0	1	5	3
c2	2020-05-21 02:00:00	85	43.63636364	30.9	11.3	74	11	10.2	0	1	5	3
c3	2020-05-21 02:00:00	85	49.09090909	45.1	10.7	74	11	10.2	0	1	5	3
c1	2020-05-21 03:00:00	85	27.27272727	26.1	10.1	73.5	11.5	8.3	0	1	5	3
c2	2020-05-21 03:00:00	85	60	30.9	10.2	73.5	11.5	8.3	0	1	5	3
c3	2020-05-21 03:00:00	85	49.09090909	45.1	9.6	73.5	11.5	8.3	0	1	5	3
c1	2020-05-21 04:00:00	85	32.72727273	26.1	9.1	73	12	7.4	0	1	5	3
c2	2020-05-21 04:00:00	85	43.63636364	31	9.3	73	12	7.4	0	1	5	3
c3	2020-05-21 04:00:00	85	43.63636364	45.2	8.6	73	12	7.4	0	1	5	3
c1	2020-05-21 05:00:00	85	49.09090909	26.1	9.3	73	12	7.4	0	1	5	3
c2	2020-05-21 05:00:00	85	70.90909091	31	9.6	73	12	7.4	0	1	5	3
c3	2020-05-21 05:00:00	85	43.63636364	45.2	8.9	73	12	7.4	0	1	5	3
c1	2020-05-21 06:00:00	85	38.18181818	26.1	8.8	73	12	7.6	0	1	5	3
c2	2020-05-21 06:00:00	85	38.18181818	31.1	9.1	73	12	7.6	0	1	5	3
c3	2020-05-21 06:00:00	85	38.18181818	45.5	8.4	73	12	7.6	0	1	5	3
c1	2020-05-21 07:00:00	85	38.18181818	26.1	9.9	73	12	10.5	0	1	5	3
c2	2020-05-21 07:00:00	85	65.45454545	31	10.6	73	12	10.5	0	1	5	3
c3	2020-05-21 07:00:00	85	43.63636364	45.5	9.8	73	12	10.5	0	1	5	3
c1	2020-05-21 08:00:00	85	60	26	10.8	73	12	13.3	0	1	5	3
c2	2020-05-21 08:00:00	85	65.45454545	31	12.8	73	12	13.3	0	1	5	3
c3	2020-05-21 08:00:00	85	54.54545455	45.5	12.7	73	12	13.3	0	1	5	3
c1	2020-05-21 09:00:00	85	60	26.2	13.1	73	12	14.4	0	1	5	3
c2	2020-05-21 09:00:00	85	103.6363636	30.7	18.2	73	12	14.4	0	1	5	3
c3	2020-05-21 09:00:00	85	70.90909091	45.1	18.2	73	12	14.4	0	1	5	3
c1	2020-05-21 10:00:00	85	76.36363636	26	16.2	73	12	16.4	0	1	5	3
c2	2020-05-21 10:00:00	85	103.6363636	30.6	20.7	73	12	16.4	0	1	5	3
c3	2020-05-21 10:00:00	85	103.6363636	44.7	20.5	73	12	16.4	0	1	5	3
c1	2020-05-21 11:00:00	85	81.81818182	26	20.5	73	12	17.3	0	1	5	3
c2	2020-05-21 11:00:00	85	136.3636364	30.6	23.3	73	12	17.3	0	1	5	3
c3	2020-05-21 11:00:00	85	130.9090909	44.7	23.3	73	12	17.3	0	1	5	3
c1	2020-05-21 12:00:00	85	98.18181818	25.7	23.3	73	12	19.3	0	1	5	3
c2	2020-05-21 12:00:00	85	158.1818182	30.5	24.9	73	12	19.3	0	1	5	3
c3	2020-05-21 12:00:00	85	152.7272727	44.5	25.6	73	12	19.3	0	1	5	3
c1	2020-05-21 13:00:00	85	114.5454545	25.2	25.6	73	12	19.8	0	1	5	3
c2	2020-05-21 13:00:00	85	152.7272727	30.2	26.7	73	12	19.8	0	1	5	3
c3	2020-05-21 13:00:00	85	158.1818182	44	27.2	73	12	19.8	0	1	5	3
c1	2020-05-21 14:00:00	85	109.0909091	25.1	26.9	72	13	20.9	0	1	5	3
c2	2020-05-21 14:00:00	85	196.3636364	30.2	27.5	72	13	20.9	0	1	5	3
c3	2020-05-21 14:00:00	85	185.4545455	43.6	28	72	13	20.9	0	1	5	3
c1	2020-05-21 15:00:00	85	114.5454545	25.1	27.2	72	13	21.2	0	1	5	3
c2	2020-05-21 15:00:00	85	190.9090909	29.9	27.5	72	13	21.2	0	1	5	3
c3	2020-05-21 15:00:00	85	180	43.9	26.9	72	13	21.2	0	1	5	3
c1	2020-05-21 16:00:00	85	147.2727273	24.9	27.5	72	13	21.9	0	1	5	3
c2	2020-05-21 16:00:00	85	212.7272727	30	27.2	72	13	21.9	0	1	5	3
c3	2020-05-21 16:00:00	85	185.4545455	43.6	25.4	72	13	21.9	0	1	5	3
c1	2020-05-21 17:00:00	85	114.5454545	24.9	26.7	72	13	22	0	1	5	3
c2	2020-05-21 17:00:00	85	223.6363636	30	25.6	72	13	22	0	1	5	3
c3	2020-05-21 17:00:00	85	201.8181818	43.6	23.5	72	13	22	0	1	5	3
c1	2020-05-21 18:00:00	85	114.5454545	25.2	26.4	72	13	22	0	1	5	3
c2	2020-05-21 18:00:00	85	196.3636364	30	23.7	72	13	22	0	1	5	3
c3	2020-05-21 18:00:00	85	207.2727273	43.6	22.1	72	13	22	0	1	5	3
c1	2020-05-21 19:00:00	85	120	25.1	24.9	72	13	22.5	0	1	5	3
c2	2020-05-21 19:00:00	85	185.4545455	30	22.1	72	13	22.5	0	1	5	3
c3	2020-05-21 19:00:00	85	185.4545455	43.7	20.9	72	13	22.5	0	1	5	3
c1	2020-05-21 20:00:00	85	120	25.2	22.1	72	13	21.3	0	1	5	3
c2	2020-05-21 20:00:00	85	190.9090909	30.1	20.3	72	13	21.3	0	1	5	3
c3	2020-05-21 20:00:00	85	174.5454545	44.1	19.3	72	13	21.3	0	1	5	3
c1	2020-05-21 21:00:00	85	81.81818182	25.1	18.4	71.75	13.25	19.5	0	1	5	3
c2	2020-05-21 21:00:00	85	158.1818182	30.1	17.7	71.75	13.25	19.5	0	1	5	3
c3	2020-05-21 21:00:00	85	136.3636364	44	17	71.75	13.25	19.5	0	1	5	3
c1	2020-05-21 22:00:00	85	120	25	16.7	71.75	13.25	17	0	1	5	3
c2	2020-05-21 22:00:00	85	114.5454545	30.2	16.2	71.75	13.25	17	0	1	5	3
c3	2020-05-21 22:00:00	85	125.4545455	43.9	15.5	71.75	13.25	17	0	1	5	3
c1	2020-05-21 23:00:00	85	98.18181818	25.2	15.5	72	13	16.2	0	1	5	3
c2	2020-05-21 23:00:00	85	125.4545455	30.4	15.4	72	13	16.2	0	1	5	3
c3	2020-05-21 23:00:00	85	136.3636364	43.9	14.6	72	13	16.2	0	1	5	3
c1	2020-05-22 00:00:00	85	98.18181818	25.4	14.4	72	13	15.3	0	1	5	3
c2	2020-05-22 00:00:00	85	120	30.4	14.3	72	13	15.3	0	1	5	3
c3	2020-05-22 00:00:00	85	114.5454545	44.2	13.7	72	13	15.3	0	1	5	3
c1	2020-05-22 01:00:00	85	81.81818182	25.4	13.7	72	13	13.3	0	1	5	3
c2	2020-05-22 01:00:00	85	114.5454545	30.3	13.8	72	13	13.3	0	1	5	3
c3	2020-05-22 01:00:00	85	109.0909091	44.2	13.3	72	13	13.3	0	1	5	3
c1	2020-05-22 02:00:00	85	60	25.2	13	72	13	12.9	0	1	5	3
c2	2020-05-22 02:00:00	85	125.4545455	30.6	13.3	72	13	12.9	0	1	5	3
c3	2020-05-22 02:00:00	85	92.72727273	44.3	12.6	72	13	12.9	0	1	5	3
c1	2020-05-22 03:00:00	85	87.27272727	25.5	12.3	72	13	11.6	0	1	5	3
c2	2020-05-22 03:00:00	85	98.18181818	30.6	12.6	72	13	11.6	0	1	5	3
c3	2020-05-22 03:00:00	85	92.72727273	44.4	12	72	13	11.6	0	1	5	3
c1	2020-05-22 04:00:00	85	70.90909091	25.6	11.7	72	13	11.2	0	1	5	3
c2	2020-05-22 04:00:00	85	92.72727273	30.6	12	72	13	11.2	0	1	5	3
c3	2020-05-22 04:00:00	85	70.90909091	44.3	11.5	72	13	11.2	0	1	5	3
c1	2020-05-22 05:00:00	85	81.81818182	25.6	11.6	71.5	13.5	11.2	0	1	5	3
c2	2020-05-22 05:00:00	85	87.27272727	30.7	12	71.5	13.5	11.2	0	1	5	3
c3	2020-05-22 05:00:00	85	87.27272727	44.3	11.3	71.5	13.5	11.2	0	1	5	3
c1	2020-05-22 06:00:00	85	76.36363636	25.5	11.5	71.5	13.5	11.4	0	1	5	3
c2	2020-05-22 06:00:00	85	103.6363636	30.5	12	71.5	13.5	11.4	0	1	5	3
c3	2020-05-22 06:00:00	85	103.6363636	44.1	11.5	71.5	13.5	11.4	0	1	5	3
c1	2020-05-22 07:00:00	85	60	25.2	12.1	71	14	11.7	0	1	5	3
c2	2020-05-22 07:00:00	85	98.18181818	30.6	12.7	71	14	11.7	0	1	5	3
c3	2020-05-22 07:00:00	85	87.27272727	44.3	12.3	71	14	11.7	0	1	5	3
c1	2020-05-22 08:00:00	85	43.63636364	25.4	13.1	71	14	12.6	0	1	5	3
c2	2020-05-22 08:00:00	85	81.81818182	30.5	13.8	71	14	12.6	0	1	5	3
c3	2020-05-22 08:00:00	85	60	44	13.4	71	14	12.6	0	1	5	3
c1	2020-05-22 09:00:00	85	65.45454545	25.3	14.7	71	14	14.9	0	1	5	3
c2	2020-05-22 09:00:00	85	103.6363636	30.5	16	71	14	14.9	0	1	5	3
c3	2020-05-22 09:00:00	85	65.45454545	43.9	15.7	71	14	14.9	0	1	5	3
c1	2020-05-22 10:00:00	85	87.27272727	25.3	16.5	71	14	16.4	0	1	5	3
c2	2020-05-22 10:00:00	85	120	30.4	17.7	71	14	16.4	0	1	5	3
c3	2020-05-22 10:00:00	85	60	43.8	17.3	71	14	16.4	0	1	5	3
c1	2020-05-22 11:00:00	85	65.45454545	24.9	18	71	14	19.4	0	1	5	3
c2	2020-05-22 11:00:00	85	109.0909091	30.1	19.3	71	14	19.4	0	1	5	3
c3	2020-05-22 11:00:00	85	92.72727273	43.8	18.9	71	14	19.4	0	1	5	3
c1	2020-05-22 12:00:00	85	70.90909091	24.9	19.1	71	14	20.9	0	1	5	3
c2	2020-05-22 12:00:00	85	136.3636364	30.1	20.3	71	14	20.9	0	1	5	3
c3	2020-05-22 12:00:00	85	185.4545455	43.5	19.7	71	14	20.9	0	1	5	3
c1	2020-05-22 13:00:00	85	76.36363636	24.7	18.9	71	14	21.5	0	1	5	3
c2	2020-05-22 13:00:00	85	158.1818182	29.9	19.9	71	14	21.5	0	1	5	3
c3	2020-05-22 13:00:00	85	70.90909091	43.1	19.5	71	14	21.5	0	1	5	3
c1	2020-05-22 14:00:00	85	70.90909091	24.6	19.3	70.5	14.5	21.9	0	1	5	3
c2	2020-05-22 14:00:00	85	141.8181818	29.9	20.1	70.5	14.5	21.9	0	1	5	3
c3	2020-05-22 14:00:00	85	109.0909091	43.2	19.7	70.5	14.5	21.9	0	1	5	3
c1	2020-05-22 15:00:00	85	92.72727273	24.7	19.5	70	15	22.4	0	1	5	3
c2	2020-05-22 15:00:00	85	147.2727273	30	20.3	70	15	22.4	0	1	5	3
c3	2020-05-22 15:00:00	85	103.6363636	43.1	19.9	70	15	22.4	0	1	5	3
c1	2020-05-22 16:00:00	85	98.18181818	24.7	18.9	70	15	22	0	1	5	3
c2	2020-05-22 16:00:00	85	125.4545455	30.1	19.7	70	15	22	0	1	5	3
c3	2020-05-22 16:00:00	85	98.18181818	42.8	19.3	70	15	22	0	1	5	3
c1	2020-05-22 17:00:00	85	70.90909091	24.6	18.6	70	15	21.4	0	1	5	3
c2	2020-05-22 17:00:00	85	109.0909091	29.9	19.1	70	15	21.4	0	1	5	3
c3	2020-05-22 17:00:00	85	87.27272727	43.1	18.8	70	15	21.4	0	1	5	3
c1	2020-05-22 18:00:00	85	81.81818182	24.6	18.6	70	15	20.7	0	1	5	3
c2	2020-05-22 18:00:00	85	130.9090909	30	19.1	70	15	20.7	0	1	5	3
c3	2020-05-22 18:00:00	85	98.18181818	43.1	18.8	70	15	20.7	0	1	5	3
c1	2020-05-22 19:00:00	85	87.27272727	24.5	18	70	15	20.8	0	1	5	3
c2	2020-05-22 19:00:00	85	158.1818182	30	18.6	70	15	20.8	0	1	5	3
c3	2020-05-22 19:00:00	85	98.18181818	43.1	18.4	70	15	20.8	0	1	5	3
c1	2020-05-22 20:00:00	85	120	24.6	17.3	70	15	20	0	1	5	3
c2	2020-05-22 20:00:00	85	120	30	17.9	70	15	20	0	1	5	3
c3	2020-05-22 20:00:00	85	76.36363636	43	17.7	70	15	20	0	1	5	3
c1	2020-05-22 21:00:00	85	54.54545455	28	16.7	70	15	17.4	1.4	1	5	3
c2	2020-05-22 21:00:00	85	49.09090909	31.1	17	70	15	17.4	1.4	1	5	3
c3	2020-05-22 21:00:00	85	92.72727273	44.6	16.8	70	15	17.4	1.4	1	5	3
c1	2020-05-22 22:00:00	85	-21.81818182	27.6	16.3	70	15	16.8	1.9	1	5	3
c2	2020-05-22 22:00:00	85	5.454545455	30.7	16.7	70	15	16.8	1.9	1	5	3
c3	2020-05-22 22:00:00	85	16.36363636	45.3	16.3	70	15	16.8	1.9	1	5	3
c1	2020-05-22 23:00:00	85	-16.36363636	28	16.3	70	15	16.4	2	1	5	3
c2	2020-05-22 23:00:00	85	-5.454545455	30.8	16.7	70	15	16.4	2	1	5	3
c3	2020-05-22 23:00:00	85	-27.27272727	45.1	16.5	70	15	16.4	2	1	5	3
c1	2020-05-23 00:00:00	85	-21.81818182	27.4	16.3	70	15	16.5	1.6	1	5	3
c2	2020-05-23 00:00:00	85	10.90909091	30.5	16.7	70	15	16.5	1.6	1	5	3
c3	2020-05-23 00:00:00	85	0	44.9	16.5	70	15	16.5	1.6	1	5	3
c1	2020-05-23 01:00:00	85	43.63636364	26.4	16.2	70	15	16.5	0.1	1	5	3
c2	2020-05-23 01:00:00	85	65.45454545	30.6	16.5	70	15	16.5	0.1	1	5	3
c3	2020-05-23 01:00:00	85	49.09090909	44.6	16.3	70	15	16.5	0.1	1	5	3
c1	2020-05-23 02:00:00	85	43.63636364	26.3	16	70	15	16.2	0	1	5	3
c2	2020-05-23 02:00:00	85	70.90909091	30.5	16.3	70	15	16.2	0	1	5	3
c3	2020-05-23 02:00:00	85	81.81818182	44.6	16.2	70	15	16.2	0	1	5	3
c1	2020-05-23 03:00:00	85	49.09090909	26.1	15.8	70	15	16.3	0	1	5	3
c2	2020-05-23 03:00:00	85	76.36363636	30.5	16.2	70	15	16.3	0	1	5	3
c3	2020-05-23 03:00:00	85	98.18181818	44.4	16	70	15	16.3	0	1	5	3
c1	2020-05-23 04:00:00	85	43.63636364	26	15.8	70	15	15.9	0	1	5	3
c2	2020-05-23 04:00:00	85	98.18181818	30.7	16.2	70	15	15.9	0	1	5	3
c3	2020-05-23 04:00:00	85	81.81818182	44.4	15.8	70	15	15.9	0	1	5	3
c1	2020-05-23 05:00:00	85	76.36363636	25.8	15.7	70	15	15.5	0	1	5	3
c2	2020-05-23 05:00:00	85	81.81818182	30.5	16	70	15	15.5	0	1	5	3
c3	2020-05-23 05:00:00	85	76.36363636	44.1	15.8	70	15	15.5	0	1	5	3
c1	2020-05-23 06:00:00	85	76.36363636	25.4	15.5	70	15	15.4	0	1	5	3
c2	2020-05-23 06:00:00	85	76.36363636	30.8	15.8	70	15	15.4	0	1	5	3
c3	2020-05-23 06:00:00	85	70.90909091	44	15.7	70	15	15.4	0	1	5	3
c1	2020-05-23 07:00:00	85	54.54545455	25.4	15.8	70	15	15.4	0	1	5	3
c2	2020-05-23 07:00:00	85	136.3636364	30.8	16	70	15	15.4	0	1	5	3
c3	2020-05-23 07:00:00	85	81.81818182	43.9	15.8	70	15	15.4	0	1	5	3
c1	2020-05-23 08:00:00	85	81.81818182	25.2	16.2	70	15	15.6	0	1	5	3
c2	2020-05-23 08:00:00	85	109.0909091	30.7	16.5	70	15	15.6	0	1	5	3
c3	2020-05-23 08:00:00	85	76.36363636	43.6	16.2	70	15	15.6	0	1	5	3
c1	2020-05-23 09:00:00	85	65.45454545	24.8	17	69.25	15.75	16.2	0	1	5	3
c2	2020-05-23 09:00:00	85	130.9090909	30.3	17.2	69.25	15.75	16.2	0	1	5	3
c3	2020-05-23 09:00:00	85	81.81818182	43.6	17	69.25	15.75	16.2	0	1	5	3
c1	2020-05-23 10:00:00	85	70.90909091	24.6	17	69	16	16.6	0	1	5	3
c2	2020-05-23 10:00:00	85	136.3636364	30.2	17.2	69	16	16.6	0	1	5	3
c3	2020-05-23 10:00:00	85	98.18181818	43.3	17	69	16	16.6	0	1	5	3
c1	2020-05-23 11:00:00	85	65.45454545	24.7	17.2	69	16	16.9	0	1	5	3
c2	2020-05-23 11:00:00	85	136.3636364	30	17.2	69	16	16.9	0	1	5	3
c3	2020-05-23 11:00:00	85	76.36363636	43	17.2	69	16	16.9	0	1	5	3
c1	2020-05-23 12:00:00	85	65.45454545	24.3	17.3	69	16	16.6	0	1	5	3
c2	2020-05-23 12:00:00	85	136.3636364	30.2	17.5	69	16	16.6	0	1	5	3
c3	2020-05-23 12:00:00	85	103.6363636	43	17.3	69	16	16.6	0	1	5	3
c1	2020-05-23 13:00:00	85	54.54545455	24.2	18.2	69	16	18.1	0	1	5	3
c2	2020-05-23 13:00:00	85	98.18181818	29.9	18	69	16	18.1	0	1	5	3
c3	2020-05-23 13:00:00	85	65.45454545	42.9	17.9	69	16	18.1	0	1	5	3
c1	2020-05-23 14:00:00	85	60	24.1	18	69	16	18.2	0	1	5	3
c2	2020-05-23 14:00:00	85	120	29.8	18	69	16	18.2	0	1	5	3
c3	2020-05-23 14:00:00	85	38.18181818	42.8	17.7	69	16	18.2	0	1	5	3
c1	2020-05-23 15:00:00	85	81.81818182	23.8	17.5	69	16	17.3	0	1	5	3
c2	2020-05-23 15:00:00	85	158.1818182	30.1	17.5	69	16	17.3	0	1	5	3
c3	2020-05-23 15:00:00	85	114.5454545	42.8	17.3	69	16	17.3	0	1	5	3
c1	2020-05-23 16:00:00	85	70.90909091	23.5	17.7	69	16	18.2	0	1	5	3
c2	2020-05-23 16:00:00	85	158.1818182	29.7	17.7	69	16	18.2	0	1	5	3
c3	2020-05-23 16:00:00	85	103.6363636	42.4	17.3	69	16	18.2	0	1	5	3
c1	2020-05-23 17:00:00	85	98.18181818	23.5	16.3	69	16	17	0	1	5	3
c2	2020-05-23 17:00:00	85	163.6363636	29.8	16.3	69	16	17	0	1	5	3
c3	2020-05-23 17:00:00	85	136.3636364	42.7	16.2	69	16	17	0	1	5	3
c1	2020-05-23 18:00:00	85	92.72727273	23.5	14.9	68.5	16.5	13.4	0	1	5	3
c2	2020-05-23 18:00:00	85	169.0909091	29.8	14.9	68.5	16.5	13.4	0	1	5	3
c3	2020-05-23 18:00:00	85	163.6363636	42.8	14.6	68.5	16.5	13.4	0	1	5	3
c1	2020-05-23 19:00:00	85	92.72727273	23.6	14.7	69	16	13.6	0	1	5	3
c2	2020-05-23 19:00:00	85	147.2727273	30.1	14.6	69	16	13.6	0	1	5	3
c3	2020-05-23 19:00:00	85	125.4545455	42.6	14.3	69	16	13.6	0	1	5	3
c1	2020-05-23 20:00:00	85	87.27272727	23.5	14.4	69	16	14	0	1	5	3
c2	2020-05-23 20:00:00	85	109.0909091	29.9	14.3	69	16	14	0	1	5	3
c3	2020-05-23 20:00:00	85	76.36363636	42.6	14	69	16	14	0	1	5	3
c1	2020-05-23 21:00:00	85	92.72727273	23.5	13.5	69	16	13.6	0	1	5	3
c2	2020-05-23 21:00:00	85	163.6363636	30.1	13.5	69	16	13.6	0	1	5	3
c3	2020-05-23 21:00:00	85	125.4545455	42.9	13.3	69	16	13.6	0	1	5	3
c1	2020-05-23 22:00:00	85	76.36363636	23.4	12	69	16	11.7	0	1	5	3
c2	2020-05-23 22:00:00	85	130.9090909	30.1	12.1	69	16	11.7	0	1	5	3
c3	2020-05-23 22:00:00	85	103.6363636	42.9	11.7	69	16	11.7	0	1	5	3
c1	2020-05-23 23:00:00	85	81.81818182	23.3	12.1	69	16	10.2	0	1	5	3
c2	2020-05-23 23:00:00	85	98.18181818	30.1	12.4	69	16	10.2	0	1	5	3
c3	2020-05-23 23:00:00	85	81.81818182	42.7	12	69	16	10.2	0	1	5	3
c1	2020-05-24 00:00:00	85	76.36363636	23.4	11.2	69	16	11.1	0	1	5	3
c2	2020-05-24 00:00:00	85	109.0909091	29.9	11.5	69	16	11.1	0	1	5	3
c3	2020-05-24 00:00:00	85	109.0909091	43	11.1	69	16	11.1	0	1	5	3
c1	2020-05-24 01:00:00	85	43.63636364	23.4	10.6	69	16	9.9	0	1	5	3
c2	2020-05-24 01:00:00	85	109.0909091	30	10.8	69	16	9.9	0	1	5	3
c3	2020-05-24 01:00:00	85	60	42.9	10.3	69	16	9.9	0	1	5	3
c1	2020-05-24 02:00:00	85	70.90909091	23.2	10.6	69	16	8.2	0	1	5	3
c2	2020-05-24 02:00:00	85	109.0909091	30.1	10.8	69	16	8.2	0	1	5	3
c3	2020-05-24 02:00:00	85	92.72727273	42.9	10.3	69	16	8.2	0	1	5	3
c1	2020-05-24 03:00:00	85	98.18181818	23.3	10.2	69	16	10.4	0	1	5	3
c2	2020-05-24 03:00:00	85	141.8181818	30.1	10.4	69	16	10.4	0	1	5	3
c3	2020-05-24 03:00:00	85	109.0909091	42.7	10.1	69	16	10.4	0	1	5	3
c1	2020-05-24 04:00:00	85	114.5454545	23.4	9.8	68.5	16.5	9.8	0	1	5	3
c2	2020-05-24 04:00:00	85	98.18181818	30.1	10.1	68.5	16.5	9.8	0	1	5	3
c3	2020-05-24 04:00:00	85	81.81818182	42.7	9.7	68.5	16.5	9.8	0	1	5	3
c1	2020-05-24 05:00:00	85	87.27272727	23.2	9.8	68.25	16.75	10.1	0	1	5	3
c2	2020-05-24 05:00:00	85	92.72727273	30.1	10.2	68.25	16.75	10.1	0	1	5	3
c3	2020-05-24 05:00:00	85	92.72727273	42.7	9.7	68.25	16.75	10.1	0	1	5	3
c1	2020-05-24 06:00:00	85	87.27272727	22.9	10.3	68	17	10.8	0	1	5	3
c2	2020-05-24 06:00:00	85	114.5454545	30.1	10.7	68	17	10.8	0	1	5	3
c3	2020-05-24 06:00:00	85	81.81818182	42.8	10.3	68	17	10.8	0	1	5	3
c1	2020-05-24 07:00:00	85	114.5454545	22.9	11.3	68	17	10.7	0	1	5	3
c2	2020-05-24 07:00:00	85	92.72727273	29.8	11.9	68	17	10.7	0	1	5	3
c3	2020-05-24 07:00:00	85	81.81818182	42.8	11.6	68	17	10.7	0	1	5	3
c1	2020-05-24 08:00:00	85	120	23.2	12.6	68	17	12.6	0	1	5	3
c2	2020-05-24 08:00:00	85	136.3636364	29.8	13.3	68	17	12.6	0	1	5	3
c3	2020-05-24 08:00:00	85	130.9090909	42.6	13.1	68	17	12.6	0	1	5	3
c1	2020-05-24 09:00:00	85	92.72727273	22.7	13.5	68	17	13.1	0	1	5	3
c2	2020-05-24 09:00:00	85	141.8181818	29.8	14.4	68	17	13.1	0	1	5	3
c3	2020-05-24 09:00:00	85	87.27272727	42.4	14.4	68	17	13.1	0	1	5	3
c1	2020-05-24 10:00:00	85	114.5454545	22.8	13.5	68	17	13	0	1	5	3
c2	2020-05-24 10:00:00	85	120	29.7	13.8	68	17	13	0	1	5	3
c3	2020-05-24 10:00:00	85	65.45454545	42.3	13.5	68	17	13	0	1	5	3
c1	2020-05-24 11:00:00	85	141.8181818	26.9	16	67.75	17.25	16	0	1	5	3
c2	2020-05-24 11:00:00	85	207.2727273	30.2	16.7	67.75	17.25	16	0	1	5	3
c3	2020-05-24 11:00:00	85	147.2727273	42.8	16.7	67.75	17.25	16	0	1	5	3
c1	2020-05-24 12:00:00	85	-21.81818182	26.8	18	68	17	14.5	2.3	1	5	3
c2	2020-05-24 12:00:00	85	-10.90909091	30.9	17.9	68	17	14.5	2.3	1	5	3
c3	2020-05-24 12:00:00	85	0	44	18.4	68	17	14.5	2.3	1	5	3
c1	2020-05-24 13:00:00	85	0	25.1	16.7	68	17	15.3	0	1	5	3
c2	2020-05-24 13:00:00	85	27.27272727	30.5	16.5	68	17	15.3	0	1	5	3
c3	2020-05-24 13:00:00	85	27.27272727	43	16.8	68	17	15.3	0	1	5	3
c1	2020-05-24 14:00:00	85	0	24.4	16	68	17	15.5	0	1	5	3
c2	2020-05-24 14:00:00	85	114.5454545	30.1	16.2	68	17	15.5	0	1	5	3
c3	2020-05-24 14:00:00	85	76.36363636	42.7	16.2	68	17	15.5	0	1	5	3
c1	2020-05-24 15:00:00	85	103.6363636	23.1	18.4	68	17	17.8	0	1	5	3
c2	2020-05-24 15:00:00	85	223.6363636	29.7	18.2	68	17	17.8	0	1	5	3
c3	2020-05-24 15:00:00	85	223.6363636	42.1	18.4	68	17	17.8	0	1	5	3
c1	2020-05-24 16:00:00	85	70.90909091	23.2	15.5	67.5	17.5	16	0	1	5	3
c2	2020-05-24 16:00:00	85	180	29.5	15.5	67.5	17.5	16	0	1	5	3
c3	2020-05-24 16:00:00	85	130.9090909	41.9	15.4	67.5	17.5	16	0	1	5	3
c1	2020-05-24 17:00:00	85	98.18181818	22.6	15.8	67.25	17.75	15.1	0	1	5	3
c2	2020-05-24 17:00:00	85	169.0909091	29.6	15.7	67.25	17.75	15.1	0	1	5	3
c3	2020-05-24 17:00:00	85	147.2727273	41.9	15.5	67.25	17.75	15.1	0	1	5	3
c1	2020-05-24 18:00:00	85	114.5454545	22.5	14.9	67	18	15.2	0	1	5	3
c2	2020-05-24 18:00:00	85	180	29.4	15	67	18	15.2	0	1	5	3
c3	2020-05-24 18:00:00	85	130.9090909	41.8	14.9	67	18	15.2	0	1	5	3
c1	2020-05-24 19:00:00	85	120	22.8	14.3	67.75	17.25	13.8	0.1	1	5	3
c2	2020-05-24 19:00:00	85	130.9090909	29.7	14.1	67.75	17.25	13.8	0.1	1	5	3
c3	2020-05-24 19:00:00	85	60	42	14.1	67.75	17.25	13.8	0.1	1	5	3
c1	2020-05-24 20:00:00	85	98.18181818	22.6	13.8	67	18	13.8	0	1	5	3
c2	2020-05-24 20:00:00	85	147.2727273	29.7	13.7	67	18	13.8	0	1	5	3
c3	2020-05-24 20:00:00	85	136.3636364	41.7	13.4	67	18	13.8	0	1	5	3
c1	2020-05-24 21:00:00	85	120	22.8	12.8	67	18	12.5	0	1	5	3
c2	2020-05-24 21:00:00	85	125.4545455	29.7	13	67	18	12.5	0	1	5	3
c3	2020-05-24 21:00:00	85	114.5454545	42.2	12.7	67	18	12.5	0	1	5	3
c1	2020-05-24 22:00:00	85	147.2727273	22.8	12.3	67.5	17.5	12.2	0	1	5	3
c2	2020-05-24 22:00:00	85	114.5454545	29.5	12.4	67.5	17.5	12.2	0	1	5	3
c3	2020-05-24 22:00:00	85	98.18181818	41.7	12.1	67.5	17.5	12.2	0	1	5	3
c1	2020-05-24 23:00:00	85	120	22.6	12	67	18	12	0	1	5	3
c2	2020-05-24 23:00:00	85	125.4545455	29.6	12.3	67	18	12	0	1	5	3
c3	2020-05-24 23:00:00	85	130.9090909	41.8	11.9	67	18	12	0	1	5	3
c1	2020-05-25 00:00:00	85	120	22.3	11.5	67	18	11.5	0	1	5	3
c2	2020-05-25 00:00:00	85	141.8181818	29.6	11.9	67	18	11.5	0	1	5	3
c3	2020-05-25 00:00:00	85	147.2727273	42	11.5	67	18	11.5	0	1	5	3
c1	2020-05-25 01:00:00	85	103.6363636	22.1	11.3	67	18	11.3	0	1	5	3
c2	2020-05-25 01:00:00	85	141.8181818	29.6	11.6	67	18	11.3	0	1	5	3
c3	2020-05-25 01:00:00	85	136.3636364	41.8	11.3	67	18	11.3	0	1	5	3
c1	2020-05-25 02:00:00	85	125.4545455	22.1	11.3	67	18	11.8	0	1	5	3
c2	2020-05-25 02:00:00	85	125.4545455	29.7	11.7	67	18	11.8	0	1	5	3
c3	2020-05-25 02:00:00	85	136.3636364	41.7	11.5	67	18	11.8	0	1	5	3
c1	2020-05-25 03:00:00	85	125.4545455	21.9	11.1	66.5	18.5	11.5	0	1	5	3
c2	2020-05-25 03:00:00	85	141.8181818	29.7	11.5	66.5	18.5	11.5	0	1	5	3
c3	2020-05-25 03:00:00	85	136.3636364	41.8	11.1	66.5	18.5	11.5	0	1	5	3
c1	2020-05-25 04:00:00	85	158.1818182	22.1	11.3	66	19	11.7	0	1	5	3
c2	2020-05-25 04:00:00	85	163.6363636	29.4	11.7	66	19	11.7	0	1	5	3
c3	2020-05-25 04:00:00	85	169.0909091	41.8	11.3	66	19	11.7	0	1	5	3
c1	2020-05-25 05:00:00	85	147.2727273	22	11.5	66	19	12.1	0	1	5	3
c2	2020-05-25 05:00:00	85	201.8181818	29.4	11.9	66	19	12.1	0	1	5	3
c3	2020-05-25 05:00:00	85	169.0909091	41.5	11.6	66	19	12.1	0	1	5	3
c1	2020-05-25 06:00:00	85	190.9090909	24.7	11.3	66	19	11.9	0	1	5	3
c2	2020-05-25 06:00:00	85	120	30.2	11.7	66	19	11.9	0	1	5	3
c3	2020-05-25 06:00:00	85	141.8181818	42.3	11.6	66	19	11.9	0	1	5	3
c1	2020-05-25 07:00:00	85	38.18181818	23.7	11.6	66	19	11.5	1.4	1	5	3
c2	2020-05-25 07:00:00	85	109.0909091	29.8	11.9	66	19	11.5	1.4	1	5	3
c3	2020-05-25 07:00:00	85	92.72727273	42.3	11.7	66	19	11.5	1.4	1	5	3
c1	2020-05-25 08:00:00	85	70.90909091	22.8	11.6	66	19	11.6	0	1	5	3
c2	2020-05-25 08:00:00	85	114.5454545	29.9	11.9	66	19	11.6	0	1	5	3
c3	2020-05-25 08:00:00	85	114.5454545	42.1	11.7	66	19	11.6	0	1	5	3
c1	2020-05-25 09:00:00	85	103.6363636	22.3	12.1	66	19	11.1	0.2	1	5	3
c2	2020-05-25 09:00:00	85	136.3636364	29.8	12.4	66	19	11.1	0.2	1	5	3
c3	2020-05-25 09:00:00	85	114.5454545	41.7	12.3	66	19	11.1	0.2	1	5	3
c1	2020-05-25 10:00:00	85	136.3636364	21.8	12.4	65.75	19.25	12.1	0	1	5	3
c2	2020-05-25 10:00:00	85	163.6363636	29.6	12.7	65.75	19.25	12.1	0	1	5	3
c3	2020-05-25 10:00:00	85	120	41.1	12.6	65.75	19.25	12.1	0	1	5	3
c1	2020-05-25 11:00:00	85	114.5454545	21.4	13.1	65	20	11.3	0	1	5	3
c2	2020-05-25 11:00:00	85	158.1818182	29.2	13.1	65	20	11.3	0	1	5	3
c3	2020-05-25 11:00:00	85	109.0909091	41.1	13	65	20	11.3	0	1	5	3
c1	2020-05-25 12:00:00	85	120	20.8	13.7	65	20	12.9	0	1	5	3
c2	2020-05-25 12:00:00	85	207.2727273	28.7	13.7	65	20	12.9	0	1	5	3
c3	2020-05-25 12:00:00	85	120	41	13.5	65	20	12.9	0	1	5	3
c1	2020-05-25 13:00:00	85	234.5454545	20.5	13.4	65	20	12.4	0	1	5	3
c2	2020-05-25 13:00:00	85	212.7272727	29	13.4	65	20	12.4	0	1	5	3
c3	2020-05-25 13:00:00	85	152.7272727	40.7	13.4	65	20	12.4	0	1	5	3
c1	2020-05-25 14:00:00	85	229.0909091	20.3	14.9	65	20	12.8	0	1	5	3
c2	2020-05-25 14:00:00	85	185.4545455	28.8	14.6	65	20	12.8	0	1	5	3
c3	2020-05-25 14:00:00	85	158.1818182	40.5	14.6	65	20	12.8	0	1	5	3
c1	2020-05-25 15:00:00	85	245.4545455	19.9	15.4	65	20	14.6	0	1	5	3
c2	2020-05-25 15:00:00	85	278.1818182	28.5	15.2	65	20	14.6	0	1	5	3
c3	2020-05-25 15:00:00	85	180	40.1	15	65	20	14.6	0	1	5	3
c1	2020-05-25 16:00:00	85	283.6363636	19.9	15.4	65	20	14.8	0	1	5	3
c2	2020-05-25 16:00:00	85	234.5454545	28.4	15.2	65	20	14.8	0	1	5	3
c3	2020-05-25 16:00:00	85	207.2727273	39.8	15	65	20	14.8	0	1	5	3
c1	2020-05-25 17:00:00	85	354.5454545	19.2	16.2	65	20	16.1	0	1	5	3
c2	2020-05-25 17:00:00	85	300	27.8	16	65	20	16.1	0	1	5	3
c3	2020-05-25 17:00:00	85	267.2727273	39.7	15.7	65	20	16.1	0	1	5	3
c1	2020-05-25 18:00:00	85	338.1818182	19.1	14.6	65	20	14.8	0	1	5	3
c2	2020-05-25 18:00:00	85	278.1818182	27.9	14.6	65	20	14.8	0	1	5	3
c3	2020-05-25 18:00:00	85	256.3636364	39.8	14.4	65	20	14.8	0	1	5	3
c1	2020-05-25 19:00:00	85	321.8181818	19.3	14	65	20	14.7	0	1	5	3
c2	2020-05-25 19:00:00	85	245.4545455	28	14	65	20	14.7	0	1	5	3
c3	2020-05-25 19:00:00	85	256.3636364	39.8	13.8	65	20	14.7	0	1	5	3
c1	2020-05-25 20:00:00	85	338.1818182	19.2	13.5	65	20	14.2	0	1	5	3
c2	2020-05-25 20:00:00	85	267.2727273	27.9	13.5	65	20	14.2	0	1	5	3
c3	2020-05-25 20:00:00	85	240	39.9	13.4	65	20	14.2	0	1	5	3
c1	2020-05-25 21:00:00	85	338.1818182	19.2	12.8	65	20	13.6	0	1	5	3
c2	2020-05-25 21:00:00	85	250.9090909	28	13.1	65	20	13.6	0	1	5	3
c3	2020-05-25 21:00:00	85	250.9090909	39.9	12.8	65	20	13.6	0	1	5	3
c1	2020-05-25 22:00:00	85	310.9090909	19.2	12.6	65.25	19.75	13.1	0	1	5	3
c2	2020-05-25 22:00:00	85	212.7272727	28	12.8	65.25	19.75	13.1	0	1	5	3
c3	2020-05-25 22:00:00	85	240	39.7	12.6	65.25	19.75	13.1	0	1	5	3
c1	2020-05-25 23:00:00	85	310.9090909	19.2	12.3	66	19	12.6	0	1	5	3
c2	2020-05-25 23:00:00	85	250.9090909	28.1	12.6	66	19	12.6	0	1	5	3
c3	2020-05-25 23:00:00	85	245.4545455	39.9	12.3	66	19	12.6	0	1	5	3
c1	2020-05-26 00:00:00	85	305.4545455	19	12	66	19	12.2	0	1	5	3
c2	2020-05-26 00:00:00	85	245.4545455	28.1	12.3	66	19	12.2	0	1	5	3
c3	2020-05-26 00:00:00	85	278.1818182	40	12	66	19	12.2	0	1	5	3
c1	2020-05-26 01:00:00	85	278.1818182	19.3	11.7	66	19	11.9	0	1	5	3
c2	2020-05-26 01:00:00	85	180	27.9	12	66	19	11.9	0	1	5	3
c3	2020-05-26 01:00:00	85	201.8181818	39.8	11.7	66	19	11.9	0	1	5	3
c1	2020-05-26 02:00:00	85	283.6363636	19.1	11.1	66	19	11.4	0	1	5	3
c2	2020-05-26 02:00:00	85	207.2727273	27.9	11.3	66	19	11.4	0	1	5	3
c3	2020-05-26 02:00:00	85	218.1818182	40	11.1	66	19	11.4	0	1	5	3
c1	2020-05-26 03:00:00	85	256.3636364	19.2	10.4	66	19	10.2	0	1	5	3
c2	2020-05-26 03:00:00	85	218.1818182	28	10.7	66	19	10.2	0	1	5	3
c3	2020-05-26 03:00:00	85	218.1818182	40	10.3	66	19	10.2	0	1	5	3
c1	2020-05-26 04:00:00	85	245.4545455	19.3	9.7	66	19	8.9	0	1	5	3
c2	2020-05-26 04:00:00	85	174.5454545	28.2	9.9	66	19	8.9	0	1	5	3
c3	2020-05-26 04:00:00	85	180	40.1	9.7	66	19	8.9	0	1	5	3
c1	2020-05-26 05:00:00	85	207.2727273	19.3	9.5	66	19	7.8	0	1	5	3
c2	2020-05-26 05:00:00	85	163.6363636	28	9.7	66	19	7.8	0	1	5	3
c3	2020-05-26 05:00:00	85	174.5454545	40	9.3	66	19	7.8	0	1	5	3
c1	2020-05-26 06:00:00	85	212.7272727	19.4	9.3	66	19	8.4	0	1	5	3
c2	2020-05-26 06:00:00	85	158.1818182	28	9.7	66	19	8.4	0	1	5	3
c3	2020-05-26 06:00:00	85	272.7272727	40.1	9.5	66	19	8.4	0	1	5	3
c1	2020-05-26 07:00:00	85	234.5454545	19	9.8	66	19	9.5	0	1	5	3
c2	2020-05-26 07:00:00	85	180	28.2	10.4	66	19	9.5	0	1	5	3
c3	2020-05-26 07:00:00	85	190.9090909	39.8	10.2	66	19	9.5	0	1	5	3
c1	2020-05-26 08:00:00	85	240	18.9	10.8	66	19	11.6	0	1	5	3
c2	2020-05-26 08:00:00	85	185.4545455	28.1	12.4	66	19	11.6	0	1	5	3
c3	2020-05-26 08:00:00	85	185.4545455	40.1	12.8	66	19	11.6	0	1	5	3
c1	2020-05-26 09:00:00	85	256.3636364	19	12.6	66	19	13.3	0	1	5	3
c2	2020-05-26 09:00:00	85	218.1818182	27.7	16.8	66	19	13.3	0	1	5	3
c3	2020-05-26 09:00:00	85	223.6363636	39.9	17.5	66	19	13.3	0	1	5	3
c1	2020-05-26 10:00:00	85	305.4545455	18.7	15.8	66	19	14.9	0	1	5	3
c2	2020-05-26 10:00:00	85	196.3636364	27.7	18.8	66	19	14.9	0	1	5	3
c3	2020-05-26 10:00:00	85	218.1818182	39.8	19.3	66	19	14.9	0	1	5	3
c1	2020-05-26 11:00:00	85	370.9090909	18.8	17.7	66	19	15.3	0	1	5	3
c2	2020-05-26 11:00:00	85	305.4545455	27.4	19.3	66	19	15.3	0	1	5	3
c3	2020-05-26 11:00:00	85	305.4545455	39.7	20.1	66	19	15.3	0	1	5	3
c1	2020-05-26 12:00:00	85	425.4545455	18.4	21.5	66	19	17.2	0	1	5	3
c2	2020-05-26 12:00:00	85	305.4545455	27.1	22.1	66	19	17.2	0	1	5	3
c3	2020-05-26 12:00:00	85	354.5454545	39.3	23	66	19	17.2	0	1	5	3
c1	2020-05-26 13:00:00	85	365.4545455	18.4	21.1	66	19	17.7	0	1	5	3
c2	2020-05-26 13:00:00	85	245.4545455	27.1	21.3	66	19	17.7	0	1	5	3
c3	2020-05-26 13:00:00	85	289.0909091	39.2	21.5	66	19	17.7	0	1	5	3
c1	2020-05-26 14:00:00	85	518.1818182	18.1	24.2	66	19	17.4	0	1	5	3
c2	2020-05-26 14:00:00	85	425.4545455	26.9	24.2	66	19	17.4	0	1	5	3
c3	2020-05-26 14:00:00	85	512.7272727	38.9	24.9	66	19	17.4	0	1	5	3
c1	2020-05-26 15:00:00	85	529.0909091	18	22.8	66	19	18.8	0	1	5	3
c2	2020-05-26 15:00:00	85	360	25.2	22.4	66	19	18.8	0	1	5	3
c3	2020-05-26 15:00:00	85	485.4545455	38.7	22.6	66	19	18.8	0	1	5	3
c1	2020-05-26 16:00:00	85	534.5454545	18	23.3	66	19	19.6	0	1	5	3
c2	2020-05-26 16:00:00	85	338.1818182	25.4	23	66	19	19.6	0	1	5	3
c3	2020-05-26 16:00:00	85	458.1818182	38.8	22.6	66	19	19.6	0	1	5	3
c1	2020-05-26 17:00:00	85	578.1818182	18.4	23	66.5	18.5	20.2	0	1	5	3
c2	2020-05-26 17:00:00	85	392.7272727	25.3	22.1	66.5	18.5	20.2	0	1	5	3
c3	2020-05-26 17:00:00	85	480	38.9	21.7	66.5	18.5	20.2	0	1	5	3
c1	2020-05-26 18:00:00	85	572.7272727	18.3	23.9	67	18	20	0	1	5	3
c2	2020-05-26 18:00:00	85	387.2727273	25.5	21.7	67	18	20	0	1	5	3
c3	2020-05-26 18:00:00	85	512.7272727	38.9	20.5	67	18	20	0	1	5	3
c1	2020-05-26 19:00:00	85	550.9090909	18.4	22.6	67	18	18.9	0	1	5	3
c2	2020-05-26 19:00:00	85	370.9090909	25.5	20.1	67	18	18.9	0	1	5	3
c3	2020-05-26 19:00:00	85	512.7272727	39	19.1	67	18	18.9	0	1	5	3
c1	2020-05-26 20:00:00	85	507.2727273	18.5	19.7	67.25	17.75	18.4	0	1	5	3
c2	2020-05-26 20:00:00	85	354.5454545	25.6	18.4	67.25	17.75	18.4	0	1	5	3
c3	2020-05-26 20:00:00	85	458.1818182	39.2	17.7	67.25	17.75	18.4	0	1	5	3
c1	2020-05-26 21:00:00	85	403.6363636	18.7	17	68	17	15	0	1	5	3
c2	2020-05-26 21:00:00	85	278.1818182	25.8	16.5	68	17	15	0	1	5	3
c3	2020-05-26 21:00:00	85	398.1818182	39	16	68	17	15	0	1	5	3
c1	2020-05-26 22:00:00	85	381.8181818	19	15.4	68	17	13.7	0	1	5	3
c2	2020-05-26 22:00:00	85	256.3636364	25.8	15.2	68	17	13.7	0	1	5	3
c3	2020-05-26 22:00:00	85	365.4545455	39.4	14.7	68	17	13.7	0	1	5	3
c1	2020-05-26 23:00:00	85	370.9090909	19	14.4	68.75	16.25	13.4	0	1	5	3
c2	2020-05-26 23:00:00	85	250.9090909	26	14.3	68.75	16.25	13.4	0	1	5	3
c3	2020-05-26 23:00:00	85	316.3636364	39.5	13.8	68.75	16.25	13.4	0	1	5	3
c1	2020-05-27 00:00:00	85	300	19.1	13.5	69	16	12.7	0	1	5	3
c2	2020-05-27 00:00:00	85	229.0909091	26.3	13.7	69	16	12.7	0	1	5	3
c3	2020-05-27 00:00:00	85	300	39.5	13.3	69	16	12.7	0	1	5	3
c1	2020-05-27 01:00:00	85	354.5454545	19.5	13.5	69.75	15.25	12.2	0	1	5	3
c2	2020-05-27 01:00:00	85	234.5454545	26.3	13.7	69.75	15.25	12.2	0	1	5	3
c3	2020-05-27 01:00:00	85	310.9090909	39.6	13.1	69.75	15.25	12.2	0	1	5	3
c1	2020-05-27 02:00:00	85	234.5454545	19.7	12.3	70	15	11.3	0	1	5	3
c2	2020-05-27 02:00:00	85	158.1818182	26.4	12.6	70	15	11.3	0	1	5	3
c3	2020-05-27 02:00:00	85	250.9090909	39.8	12	70	15	11.3	0	1	5	3
c1	2020-05-27 03:00:00	85	256.3636364	19.7	11.3	70.5	14.5	10.8	0	1	5	3
c2	2020-05-27 03:00:00	85	103.6363636	26.4	11.5	70.5	14.5	10.8	0	1	5	3
c3	2020-05-27 03:00:00	85	316.3636364	39.7	11.1	70.5	14.5	10.8	0	1	5	3
c1	2020-05-27 04:00:00	85	234.5454545	19.8	10.2	70.75	14.25	9.5	0	1	5	3
c2	2020-05-27 04:00:00	85	180	26.4	10.4	70.75	14.25	9.5	0	1	5	3
c3	2020-05-27 04:00:00	85	250.9090909	39.9	10.1	70.75	14.25	9.5	0	1	5	3
c1	2020-05-27 05:00:00	85	289.0909091	19.8	10.6	71	14	8.5	0	1	5	3
c2	2020-05-27 05:00:00	85	190.9090909	26.4	10.8	71	14	8.5	0	1	5	3
c3	2020-05-27 05:00:00	85	250.9090909	40	10.2	71	14	8.5	0	1	5	3
c1	2020-05-27 06:00:00	85	300	19.8	10.7	71	14	8.8	0	1	5	3
c2	2020-05-27 06:00:00	85	174.5454545	26.4	11	71	14	8.8	0	1	5	3
c3	2020-05-27 06:00:00	85	185.4545455	40	10.4	71	14	8.8	0	1	5	3
c1	2020-05-27 07:00:00	85	272.7272727	20.1	11.2	71	14	12	0	1	5	3
c2	2020-05-27 07:00:00	85	190.9090909	26.6	11.7	71	14	12	0	1	5	3
c3	2020-05-27 07:00:00	85	240	40	11.3	71	14	12	0	1	5	3
c1	2020-05-27 08:00:00	85	321.8181818	20.2	12.3	71	14	15.2	0	1	5	3
c2	2020-05-27 08:00:00	85	190.9090909	26.3	14	71	14	15.2	0	1	5	3
c3	2020-05-27 08:00:00	85	256.3636364	40	14.4	71	14	15.2	0	1	5	3
c1	2020-05-27 10:00:00	75	87.27272727	48.8	21.7	71	4	19.4	0	1	5	4
c2	2020-05-27 10:00:00	75	174.5454545	38.5	21.5	71	4	19.4	0	1	5	4
c3	2020-05-27 10:00:00	85	414.5454545	45.5	21.7	71	14	19.4	0	1	5	4
c1	2020-05-27 11:00:00	75	76.36363636	48.3	20.7	71	4	20.1	0	1	5	4
c2	2020-05-27 11:00:00	75	163.6363636	38.6	20.5	71	4	20.1	0	1	5	4
c3	2020-05-27 11:00:00	85	376.3636364	45.8	20.9	71	14	20.1	0	1	5	4
c1	2020-05-27 12:00:00	75	114.5454545	48.1	23.9	71	4	20.8	0	1	5	4
c2	2020-05-27 12:00:00	75	207.2727273	38.3	23.9	71	4	20.8	0	1	5	4
c3	2020-05-27 12:00:00	85	441.8181818	45.4	25.1	71	14	20.8	0	1	5	4
c1	2020-05-27 13:00:00	75	60	49.2	21.3	71	4	20.2	0	1	5	4
c2	2020-05-27 13:00:00	75	120	39.5	21.5	71	4	20.2	0	1	5	4
c3	2020-05-27 13:00:00	85	452.7272727	45.5	22.6	71	14	20.2	0	1	5	4
c1	2020-05-27 14:00:00	75	109.0909091	49.4	24.2	71	4	22.2	0	1	5	4
c2	2020-05-27 14:00:00	75	152.7272727	39.4	23.9	71	4	22.2	0	1	5	4
c3	2020-05-27 14:00:00	85	469.0909091	45.2	25.9	71	14	22.2	0	1	5	4
c1	2020-05-27 15:00:00	75	109.0909091	48.3	25.9	71	4	22.3	0	1	5	4
c2	2020-05-27 15:00:00	75	180	39	25.1	71	4	22.3	0	1	5	4
c3	2020-05-27 15:00:00	85	501.8181818	45	28	71	14	22.3	0	1	5	4
c1	2020-05-27 16:00:00	75	114.5454545	48.6	24.4	71	4	22.8	0	1	5	4
c2	2020-05-27 16:00:00	75	158.1818182	39.2	23.7	71	4	22.8	0	1	5	4
c3	2020-05-27 16:00:00	85	463.6363636	45	26.2	71	14	22.8	0	1	5	4
c1	2020-05-27 17:00:00	75	109.0909091	49.3	23	71	4	22.8	0	1	5	4
c2	2020-05-27 17:00:00	75	147.2727273	39.2	22.8	71	4	22.8	0	1	5	4
c3	2020-05-27 17:00:00	85	490.9090909	45.1	24.7	71	14	22.8	0	1	5	4
c1	2020-05-27 18:00:00	75	87.27272727	49	20.9	71	4	22	0	1	5	4
c2	2020-05-27 18:00:00	75	130.9090909	39.6	21.1	71	4	22	0	1	5	4
c3	2020-05-27 18:00:00	85	507.2727273	45.1	22.1	71	14	22	0	1	5	4
c1	2020-05-27 19:00:00	75	87.27272727	49.2	20.1	71	4	20.9	0	1	5	4
c2	2020-05-27 19:00:00	75	98.18181818	39.6	20.1	71	4	20.9	0	1	5	4
c3	2020-05-27 19:00:00	85	501.8181818	45.6	20.9	71	14	20.9	0	1	5	4
c1	2020-05-27 20:00:00	75	76.36363636	49.5	18.8	71	4	20	0	1	5	4
c2	2020-05-27 20:00:00	75	87.27272727	39.6	19.1	71	4	20	0	1	5	4
c3	2020-05-27 20:00:00	85	474.5454545	45.7	19.5	71	14	20	0	1	5	4
c1	2020-05-27 21:00:00	75	60	49.5	17.7	71.75	3.25	18.7	0	1	5	4
c2	2020-05-27 21:00:00	75	120	39.6	18	71.75	3.25	18.7	0	1	5	4
c3	2020-05-27 21:00:00	85	463.6363636	45.7	18	71.75	13.25	18.7	0	1	5	4
c1	2020-05-27 22:00:00	75	60	49.9	16.8	71.75	3.25	17.5	0	1	5	4
c2	2020-05-27 22:00:00	75	103.6363636	39.6	17	71.75	3.25	17.5	0	1	5	4
c3	2020-05-27 22:00:00	85	501.8181818	45.7	17	71.75	13.25	17.5	0	1	5	4
c1	2020-05-27 23:00:00	75	92.72727273	49.9	16.3	71	4	17.4	0	1	5	4
c2	2020-05-27 23:00:00	75	98.18181818	39.9	16.5	71	4	17.4	0	1	5	4
c3	2020-05-27 23:00:00	85	430.9090909	45.6	16.7	71	14	17.4	0	1	5	4
c1	2020-05-28 00:00:00	75	81.81818182	49.9	15.5	71.5	3.5	16.1	0	1	5	4
c2	2020-05-28 00:00:00	75	60	39.7	15.7	71.5	3.5	16.1	0	1	5	4
c3	2020-05-28 00:00:00	85	441.8181818	45.9	15.7	71.5	13.5	16.1	0	1	5	4
c1	2020-05-28 01:00:00	75	-5.454545455	50.2	14.6	72	3	13.3	0.6	1	5	4
c2	2020-05-28 01:00:00	75	16.36363636	40.2	14.6	72	3	13.3	0.6	1	5	4
c3	2020-05-28 01:00:00	85	218.1818182	46.2	14.4	72	13	13.3	0.6	1	5	4
c1	2020-05-28 02:00:00	75	38.18181818	50.1	14.1	72	3	12.9	0.3	1	5	4
c2	2020-05-28 02:00:00	75	54.54545455	40.1	14.3	72	3	12.9	0.3	1	5	4
c3	2020-05-28 02:00:00	85	289.0909091	46.2	14	72	13	12.9	0.3	1	5	4
c1	2020-05-28 03:00:00	75	38.18181818	50.2	13.3	72	3	12.5	0	1	5	4
c2	2020-05-28 03:00:00	75	49.09090909	40.2	13.4	72	3	12.5	0	1	5	4
c3	2020-05-28 03:00:00	85	229.0909091	46.3	13.1	72	13	12.5	0	1	5	4
c1	2020-05-28 04:00:00	75	43.63636364	50.1	12.6	72	3	12.3	0	1	5	4
c2	2020-05-28 04:00:00	75	54.54545455	40.2	12.6	72	3	12.3	0	1	5	4
c3	2020-05-28 04:00:00	85	234.5454545	46.2	12.3	72	13	12.3	0	1	5	4
c1	2020-05-28 05:00:00	75	49.09090909	50.5	11.6	72	3	10.7	0	1	5	4
c2	2020-05-28 05:00:00	75	60	40.5	11.7	72	3	10.7	0	1	5	4
c3	2020-05-28 05:00:00	85	229.0909091	46.3	11.3	72	13	10.7	0	1	5	4
c1	2020-05-28 06:00:00	75	27.27272727	50.5	11.3	72	3	10	0	1	5	4
c2	2020-05-28 06:00:00	75	43.63636364	40.3	11.5	72	3	10	0	1	5	4
c3	2020-05-28 06:00:00	85	174.5454545	46.3	11.1	72	13	10	0	1	5	4
c1	2020-05-28 07:00:00	75	65.45454545	50.5	11.5	72.25	2.75	10.8	0	1	5	4
c2	2020-05-28 07:00:00	75	38.18181818	40.6	11.6	72.25	2.75	10.8	0	1	5	4
c3	2020-05-28 07:00:00	85	201.8181818	46.1	11.2	72.25	12.75	10.8	0	1	5	4
c1	2020-05-28 08:00:00	75	32.72727273	50.2	13.7	72	3	12	0	1	5	4
c2	2020-05-28 08:00:00	75	43.63636364	40.3	13.3	72	3	12	0	1	5	4
c3	2020-05-28 08:00:00	85	185.4545455	46.1	13.4	72	13	12	0	1	5	4
c1	2020-05-28 09:00:00	75	70.90909091	50	16.2	72	3	13	0	1	5	4
c2	2020-05-28 09:00:00	75	43.63636364	40.4	15.8	72	3	13	0	1	5	4
c3	2020-05-28 09:00:00	85	212.7272727	46.6	16.5	72	13	13	0	1	5	4
c1	2020-05-28 10:00:00	75	54.54545455	49.8	18.4	72	3	14.2	0	1	5	4
c2	2020-05-28 10:00:00	75	54.54545455	40	18.2	72	3	14.2	0	1	5	4
c3	2020-05-28 10:00:00	85	223.6363636	46.2	18.8	72	13	14.2	0	1	5	4
c1	2020-05-28 11:00:00	75	70.90909091	49.5	20.5	72.75	2.25	15.8	0	1	5	4
c2	2020-05-28 11:00:00	75	54.54545455	40	20.1	72.75	2.25	15.8	0	1	5	4
c3	2020-05-28 11:00:00	85	218.1818182	46.2	20.9	72.75	12.25	15.8	0	1	5	4
c1	2020-05-28 12:00:00	75	81.81818182	49.5	23.9	73	2	16.5	0	1	5	4
c2	2020-05-28 12:00:00	75	81.81818182	39.8	23.7	73	2	16.5	0	1	5	4
c3	2020-05-28 12:00:00	85	305.4545455	45.7	24.9	73	12	16.5	0	1	5	4
c1	2020-05-28 13:00:00	75	103.6363636	48.9	25.9	73	2	18.4	0	1	5	4
c2	2020-05-28 13:00:00	75	76.36363636	39.7	25.6	73	2	18.4	0	1	5	4
c3	2020-05-28 13:00:00	85	403.6363636	45.4	27.5	73	12	18.4	0	1	5	4
c1	2020-05-28 14:00:00	75	81.81818182	49.2	24.7	73	2	19.4	0	1	5	4
c2	2020-05-28 14:00:00	75	87.27272727	39.7	24.9	73	2	19.4	0	1	5	4
c3	2020-05-28 14:00:00	85	414.5454545	45.7	25.9	73	12	19.4	0	1	5	4
c1	2020-05-28 15:00:00	75	81.81818182	49.1	23.7	73	2	18.5	0	1	5	4
c2	2020-05-28 15:00:00	75	76.36363636	39.6	24.2	73	2	18.5	0	1	5	4
c3	2020-05-28 15:00:00	85	392.7272727	45.4	24.9	73	12	18.5	0	1	5	4
c1	2020-05-28 16:00:00	75	54.54545455	49	23	73	2	19.3	0	1	5	4
c2	2020-05-28 16:00:00	75	54.54545455	39.7	23.7	73	2	19.3	0	1	5	4
c3	2020-05-28 16:00:00	85	316.3636364	45.9	24.4	73	12	19.3	0	1	5	4
c1	2020-05-28 17:00:00	75	65.45454545	49.4	21.7	73	2	19.5	0	1	5	4
c2	2020-05-28 17:00:00	75	54.54545455	39.3	22.6	73	2	19.5	0	1	5	4
c3	2020-05-28 17:00:00	85	436.3636364	45.9	23.9	73	12	19.5	0	1	5	4
c1	2020-05-28 18:00:00	75	70.90909091	49.2	21.5	73	2	20.2	0	1	5	4
c2	2020-05-28 18:00:00	75	49.09090909	39.4	21.9	73	2	20.2	0	1	5	4
c3	2020-05-28 18:00:00	85	529.0909091	45.9	22.4	73	12	20.2	0	1	5	4
c1	2020-05-28 19:00:00	75	65.45454545	49.6	18.8	73.25	1.75	18.9	0	1	5	4
c2	2020-05-28 19:00:00	75	87.27272727	40.2	19.1	73.25	1.75	18.9	0	1	5	4
c3	2020-05-28 19:00:00	85	420	45.9	19.1	73.25	11.75	18.9	0	1	5	4
c1	2020-05-28 20:00:00	75	60	49.7	17.2	73.75	1.25	18.4	0	1	5	4
c2	2020-05-28 20:00:00	75	70.90909091	40.1	17.5	73.75	1.25	18.4	0	1	5	4
c3	2020-05-28 20:00:00	85	327.2727273	46.2	17.2	73.75	11.25	18.4	0	1	5	4
c1	2020-05-28 21:00:00	75	76.36363636	49.9	15.8	74	1	17.1	0	1	5	4
c2	2020-05-28 21:00:00	75	60	40.4	16.2	74	1	17.1	0	1	5	4
c3	2020-05-28 21:00:00	85	441.8181818	46.4	15.5	74	11	17.1	0	1	5	4
c1	2020-05-28 22:00:00	75	76.36363636	49.9	14.7	74	1	15.7	0	1	5	4
c2	2020-05-28 22:00:00	75	43.63636364	40.4	14.7	74	1	15.7	0	1	5	4
c3	2020-05-28 22:00:00	85	349.0909091	46.4	13.8	74	11	15.7	0	1	5	4
c1	2020-05-28 23:00:00	75	49.09090909	50.2	13.5	74	1	13.4	0	1	5	4
c2	2020-05-28 23:00:00	75	38.18181818	40.6	13.7	74	1	13.4	0	1	5	4
c3	2020-05-28 23:00:00	85	283.6363636	46.4	12.7	74	11	13.4	0	1	5	4
c1	2020-05-29 00:00:00	75	43.63636364	50.2	12.7	74	1	11.9	0	1	5	4
c2	2020-05-29 00:00:00	75	21.81818182	40.6	12.8	74	1	11.9	0	1	5	4
c3	2020-05-29 00:00:00	85	261.8181818	46.5	11.7	74	11	11.9	0	1	5	4
c1	2020-05-29 01:00:00	75	54.54545455	50.6	11.6	74	1	10.2	0	1	5	4
c2	2020-05-29 01:00:00	75	32.72727273	40.6	11.7	74	1	10.2	0	1	5	4
c3	2020-05-29 01:00:00	85	240	46.6	10.4	74	11	10.2	0	1	5	4
c1	2020-05-29 02:00:00	75	38.18181818	50.8	11	74	1	8.9	0	1	5	4
c2	2020-05-29 02:00:00	75	43.63636364	40.7	11	74	1	8.9	0	1	5	4
c3	2020-05-29 02:00:00	85	218.1818182	46.6	9.7	74	11	8.9	0	1	5	4
c1	2020-05-29 03:00:00	75	-16.36363636	50.8	10.1	74	1	8.2	0	1	5	4
c2	2020-05-29 03:00:00	75	32.72727273	40.7	10.1	74	1	8.2	0	1	5	4
c3	2020-05-29 03:00:00	85	190.9090909	46.5	8.9	74	11	8.2	0	1	5	4
c1	2020-05-29 04:00:00	75	38.18181818	50.8	9.2	74	1	7.4	0	1	5	4
c2	2020-05-29 04:00:00	75	32.72727273	40.8	9.1	74	1	7.4	0	1	5	4
c3	2020-05-29 04:00:00	85	196.3636364	46.6	7.8	74	11	7.4	0	1	5	4
c3	2020-05-29 05:00:00	85	163.6363636	46.7	7.2	74.25	10.75	6.5	0	1	5	4
c3	2020-05-29 06:00:00	85	169.0909091	46.8	7.8	74.5	10.5	6.1	0	1	5	4
c3	2020-05-29 07:00:00	85	190.9090909	46.9	9	75	10	10.7	0	1	5	4
c3	2020-05-29 08:00:00	85	87.27272727	47.1	12	75	10	11.8	0	1	5	4
c3	2020-05-29 09:00:00	85	114.5454545	46.7	15.5	75	10	13.4	0	1	5	4
c3	2020-05-29 10:00:00	85	125.4545455	46.1	20.1	74.5	10.5	14.8	0	1	5	4
c3	2020-05-29 11:00:00	85	136.3636364	46.2	22.6	74.5	10.5	16.6	0	1	5	4
c1	2020-05-29 12:00:00	75	43.63636364	50.1	22.6	74	1	18.1	0	1	5	4
c2	2020-05-29 12:00:00	75	27.27272727	40	22.8	74	1	18.1	0	1	5	4
c3	2020-05-29 12:00:00	85	261.8181818	46	23.5	74	11	18.1	0	1	5	4
c3	2020-05-29 13:00:00	85	190.9090909	45.9	27.5	74.25	10.75	19.5	0	1	5	4
c1	2020-05-29 14:00:00	75	49.09090909	49.7	24.7	74	1	19.8	0	1	5	4
c2	2020-05-29 14:00:00	75	38.18181818	39.7	24.9	74	1	19.8	0	1	5	4
c3	2020-05-29 14:00:00	85	152.7272727	46	25.9	74	11	19.8	0	1	5	4
c1	2020-05-29 15:00:00	75	38.18181818	49.7	24.2	74	1	19.5	0	1	5	4
c2	2020-05-29 15:00:00	75	21.81818182	40	24.4	74	1	19.5	0	1	5	4
c3	2020-05-29 15:00:00	85	327.2727273	46	25.4	74	11	19.5	0	1	5	4
c1	2020-05-29 16:00:00	75	54.54545455	49.9	22.8	74	1	19.7	0	1	5	4
c2	2020-05-29 16:00:00	75	38.18181818	39.9	23	74	1	19.7	0	1	5	4
c3	2020-05-29 16:00:00	85	327.2727273	46	23.3	74	11	19.7	0	1	5	4
c1	2020-05-29 17:00:00	75	32.72727273	49.9	22.8	74	1	19.7	0	1	5	4
c2	2020-05-29 17:00:00	75	21.81818182	40.2	23	74	1	19.7	0	1	5	4
c3	2020-05-29 17:00:00	85	272.7272727	45.6	23.7	74	11	19.7	0	1	5	4
c1	2020-05-29 18:00:00	75	60	50.1	19.7	74	1	19.7	0	1	5	4
c2	2020-05-29 18:00:00	75	43.63636364	40.2	20.5	74	1	19.7	0	1	5	4
c3	2020-05-29 18:00:00	85	376.3636364	45.7	20.3	74	11	19.7	0	1	5	4
c1	2020-05-29 19:00:00	75	49.09090909	50.1	18.4	74	1	20	0	1	5	4
c2	2020-05-29 19:00:00	75	38.18181818	40.4	18.9	74	1	20	0	1	5	4
c3	2020-05-29 19:00:00	85	360	45.7	18.4	74	11	20	0	1	5	4
c1	2020-05-29 20:00:00	75	49.09090909	50.4	17.9	73	2	19.6	0	1	5	4
c2	2020-05-29 20:00:00	75	54.54545455	40.5	18.4	73	2	19.6	0	1	5	4
c3	2020-05-29 20:00:00	85	480	46.2	18	73	12	19.6	0	1	5	4
c1	2020-05-29 21:00:00	75	65.45454545	50.4	16.7	73	2	18.9	0	1	5	4
c2	2020-05-29 21:00:00	75	60	40.3	17	73	2	18.9	0	1	5	4
c3	2020-05-29 21:00:00	85	376.3636364	46.1	16.7	73	12	18.9	0	1	5	4
c1	2020-05-29 22:00:00	75	60	50.7	14.9	73	2	17	0	1	5	4
c2	2020-05-29 22:00:00	75	98.18181818	40.5	15.2	73	2	17	0	1	5	4
c3	2020-05-29 22:00:00	85	316.3636364	46.2	14.4	73	12	17	0	1	5	4
c1	2020-05-29 23:00:00	75	81.81818182	50.6	13.5	73	2	13.6	0	1	5	4
c2	2020-05-29 23:00:00	75	43.63636364	40.4	14	73	2	13.6	0	1	5	4
c3	2020-05-29 23:00:00	85	272.7272727	46.2	12.8	73	12	13.6	0	1	5	4
c1	2020-05-30 00:00:00	75	27.27272727	50.7	12	73	2	11.7	0	1	5	4
c2	2020-05-30 00:00:00	75	27.27272727	40.5	12.4	73	2	11.7	0	1	5	4
c3	2020-05-30 00:00:00	85	234.5454545	46.3	11.2	73	12	11.7	0	1	5	4
c1	2020-05-30 01:00:00	75	60	51	11.6	73	2	11.4	0	1	5	4
c2	2020-05-30 01:00:00	75	43.63636364	40.8	11.9	73	2	11.4	0	1	5	4
c3	2020-05-30 01:00:00	85	223.6363636	46.4	10.7	73	12	11.4	0	1	5	4
c1	2020-05-30 02:00:00	75	54.54545455	51	10.7	72.25	2.75	11.3	0	1	5	4
c2	2020-05-30 02:00:00	75	32.72727273	40.8	11.1	72.25	2.75	11.3	0	1	5	4
c3	2020-05-30 02:00:00	85	201.8181818	46.5	9.8	72.25	12.75	11.3	0	1	5	4
c1	2020-05-30 03:00:00	75	32.72727273	51	10.3	72	3	9.7	0	1	5	4
c2	2020-05-30 03:00:00	75	27.27272727	40.9	10.6	72	3	9.7	0	1	5	4
c3	2020-05-30 03:00:00	85	196.3636364	46.4	9.3	72	13	9.7	0	1	5	4
c1	2020-05-30 04:00:00	75	21.81818182	51	10.4	72	3	8.2	0	1	5	4
c2	2020-05-30 04:00:00	75	38.18181818	40.9	10.8	72	3	8.2	0	1	5	4
c3	2020-05-30 04:00:00	85	212.7272727	46.5	9.9	72	13	8.2	0	1	5	4
c1	2020-05-30 05:00:00	75	70.90909091	51	10.8	72	3	9.1	0	1	5	4
c2	2020-05-30 05:00:00	75	49.09090909	40.6	11.1	72	3	9.1	0	1	5	4
c3	2020-05-30 05:00:00	85	207.2727273	46.5	10.3	72	13	9.1	0	1	5	4
c1	2020-05-30 06:00:00	75	21.81818182	51.3	11.3	72	3	11.5	0	1	5	4
c2	2020-05-30 06:00:00	75	21.81818182	40.8	11.6	72	3	11.5	0	1	5	4
c3	2020-05-30 06:00:00	85	212.7272727	46.2	11.1	72	13	11.5	0	1	5	4
c1	2020-05-30 07:00:00	75	49.09090909	51.2	11.9	72	3	12.2	0	1	5	4
c2	2020-05-30 07:00:00	75	32.72727273	40.9	12.1	72	3	12.2	0	1	5	4
c3	2020-05-30 07:00:00	85	207.2727273	46.5	11.7	72	13	12.2	0	1	5	4
c1	2020-05-30 08:00:00	75	70.90909091	51.2	14	72	3	12.4	0	1	5	4
c2	2020-05-30 08:00:00	75	32.72727273	40.7	13.7	72	3	12.4	0	1	5	4
c3	2020-05-30 08:00:00	85	196.3636364	46.2	14.1	72	13	12.4	0	1	5	4
c1	2020-05-30 09:00:00	75	27.27272727	50.8	16.7	72	3	14.9	0	1	5	4
c2	2020-05-30 09:00:00	75	16.36363636	40.7	16.5	72	3	14.9	0	1	5	4
c3	2020-05-30 09:00:00	85	201.8181818	46.4	17.3	72	13	14.9	0	1	5	4
c1	2020-05-30 10:00:00	75	43.63636364	50.7	20.1	71.25	3.75	16.1	0	1	5	4
c2	2020-05-30 10:00:00	75	38.18181818	40.4	19.9	71.25	3.75	16.1	0	1	5	4
c3	2020-05-30 10:00:00	85	218.1818182	46.3	20.7	71.25	13.75	16.1	0	1	5	4
c1	2020-05-30 11:00:00	75	49.09090909	50.4	22.1	71	4	17.5	0	1	5	4
c2	2020-05-30 11:00:00	75	49.09090909	40.3	21.9	71	4	17.5	0	1	5	4
c3	2020-05-30 11:00:00	85	229.0909091	46.1	22.8	71	14	17.5	0	1	5	4
c1	2020-05-30 12:00:00	75	32.72727273	50.4	20.7	71	4	18.5	0	1	5	4
c2	2020-05-30 12:00:00	75	38.18181818	40.1	21.1	71	4	18.5	0	1	5	4
c3	2020-05-30 12:00:00	85	250.9090909	46	21.9	71	14	18.5	0	1	5	4
c1	2020-05-30 13:00:00	75	38.18181818	50.3	19.7	71	4	18.1	0	1	5	4
c2	2020-05-30 13:00:00	75	27.27272727	40.4	19.7	71	4	18.1	0	1	5	4
c3	2020-05-30 13:00:00	85	245.4545455	45.7	19.9	71	14	18.1	0	1	5	4
c1	2020-05-30 14:00:00	75	60	50.1	21.1	71	4	18.6	0	1	5	4
c2	2020-05-30 14:00:00	75	32.72727273	40.3	21.3	71	4	18.6	0	1	5	4
c3	2020-05-30 14:00:00	85	141.8181818	46.1	21.9	71	14	18.6	0	1	5	4
c1	2020-05-30 15:00:00	75	21.81818182	50.2	18.8	71	4	18.4	0	1	5	4
c2	2020-05-30 15:00:00	75	21.81818182	40.4	19.1	71	4	18.4	0	1	5	4
c3	2020-05-30 15:00:00	85	261.8181818	45.6	19.1	71	14	18.4	0	1	5	4
c1	2020-05-30 16:00:00	75	16.36363636	50.4	20.7	71	4	18.6	0	1	5	4
c2	2020-05-30 16:00:00	75	43.63636364	40.3	21.1	71	4	18.6	0	1	5	4
c3	2020-05-30 16:00:00	85	267.2727273	45.8	21.7	71	14	18.6	0	1	5	4
c1	2020-05-30 17:00:00	75	10.90909091	50.5	18.2	71.25	3.75	18.3	0	1	5	4
c2	2020-05-30 17:00:00	75	5.454545455	40	18.6	71.25	3.75	18.3	0	1	5	4
c3	2020-05-30 17:00:00	85	283.6363636	46	18.6	71.25	13.75	18.3	0	1	5	4
c1	2020-05-30 18:00:00	75	60	50.5	17.2	71.25	3.75	17.4	0	1	5	4
c2	2020-05-30 18:00:00	75	16.36363636	40.1	17.3	71.25	3.75	17.4	0	1	5	4
c3	2020-05-30 18:00:00	85	278.1818182	45.7	17.2	71.25	13.75	17.4	0	1	5	4
c1	2020-05-30 19:00:00	75	21.81818182	50.6	16.2	71.75	3.25	17.6	0	1	5	4
c2	2020-05-30 19:00:00	75	32.72727273	39.9	16.5	71.75	3.25	17.6	0	1	5	4
c3	2020-05-30 19:00:00	85	272.7272727	46.1	16.3	71.75	13.25	17.6	0	1	5	4
c1	2020-05-30 20:00:00	75	32.72727273	51.1	14.4	72	3	16.6	0	1	5	4
c2	2020-05-30 20:00:00	75	27.27272727	40.1	14.7	72	3	16.6	0	1	5	4
c3	2020-05-30 20:00:00	85	272.7272727	45.8	14.4	72	13	16.6	0	1	5	4
c1	2020-05-30 21:00:00	75	38.18181818	51	13.1	72	3	15.8	0	1	5	4
c2	2020-05-30 21:00:00	75	43.63636364	40.3	13.4	72	3	15.8	0	1	5	4
c3	2020-05-30 21:00:00	85	305.4545455	46.3	13	72	13	15.8	0	1	5	4
c1	2020-05-30 22:00:00	75	32.72727273	51.1	12.1	72	3	14.1	0	1	5	4
c2	2020-05-30 22:00:00	75	54.54545455	40.3	12.4	72	3	14.1	0	1	5	4
c3	2020-05-30 22:00:00	85	250.9090909	46.3	11.5	72	13	14.1	0	1	5	4
c1	2020-05-30 23:00:00	75	49.09090909	51.1	11.2	72	3	12.5	0	1	5	4
c2	2020-05-30 23:00:00	75	27.27272727	40.3	11.3	72	3	12.5	0	1	5	4
c3	2020-05-30 23:00:00	85	240	46.4	10.3	72	13	12.5	0	1	5	4
c1	2020-05-31 00:00:00	75	21.81818182	51.3	10.4	72	3	12.1	0	1	5	4
c2	2020-05-31 00:00:00	75	21.81818182	40.3	10.6	72	3	12.1	0	1	5	4
c3	2020-05-31 00:00:00	85	212.7272727	46.4	9.6	72	13	12.1	0	1	5	4
c1	2020-05-31 01:00:00	75	27.27272727	51.3	9.8	72	3	9.5	0	1	5	4
c2	2020-05-31 01:00:00	75	32.72727273	40.4	9.9	72	3	9.5	0	1	5	4
c3	2020-05-31 01:00:00	85	223.6363636	46.4	9	72	13	9.5	0	1	5	4
c1	2020-05-31 02:00:00	75	16.36363636	51.6	9.3	72	3	7.7	0	1	5	4
c2	2020-05-31 02:00:00	75	27.27272727	40.4	9.6	72	3	7.7	0	1	5	4
c3	2020-05-31 02:00:00	85	201.8181818	46.5	8.5	72	13	7.7	0	1	5	4
c1	2020-05-31 03:00:00	75	27.27272727	51.5	9.1	72	3	6.8	0	1	5	4
c2	2020-05-31 03:00:00	75	32.72727273	40.4	9.3	72	3	6.8	0	1	5	4
c3	2020-05-31 03:00:00	85	212.7272727	46.5	8.3	72	13	6.8	0	1	5	4
c1	2020-05-31 04:00:00	75	27.27272727	51.5	9.2	72	3	6.8	0	1	5	4
c2	2020-05-31 04:00:00	75	32.72727273	40.5	9.3	72	3	6.8	0	1	5	4
c3	2020-05-31 04:00:00	85	169.0909091	46.5	8.5	72	13	6.8	0	1	5	4
c1	2020-05-31 05:00:00	75	16.36363636	51.5	9.1	72	3	7.8	0	1	5	4
c2	2020-05-31 05:00:00	75	21.81818182	40.5	9.3	72	3	7.8	0	1	5	4
c3	2020-05-31 05:00:00	85	152.7272727	46.5	8.5	72	13	7.8	0	1	5	4
c1	2020-05-31 06:00:00	75	21.81818182	51.6	9.8	72	3	7.9	0	1	5	4
c2	2020-05-31 06:00:00	75	27.27272727	40.4	9.9	72	3	7.9	0	1	5	4
c3	2020-05-31 06:00:00	85	169.0909091	46.8	9.5	72	13	7.9	0	1	5	4
c1	2020-05-31 07:00:00	75	5.454545455	51.4	11.2	72	3	9.7	0	1	5	4
c2	2020-05-31 07:00:00	75	16.36363636	39.9	11.3	72	3	9.7	0	1	5	4
c3	2020-05-31 07:00:00	85	180	46.5	11.1	72	13	9.7	0	1	5	4
c1	2020-05-31 08:00:00	75	21.81818182	51.3	13	72	3	11.8	0	1	5	4
c2	2020-05-31 08:00:00	75	0	39.9	13.1	72	3	11.8	0	1	5	4
c3	2020-05-31 08:00:00	85	185.4545455	46.5	13.1	72	13	11.8	0	1	5	4
c1	2020-05-31 09:00:00	75	21.81818182	51.2	14.6	72	3	13	0	1	5	4
c2	2020-05-31 09:00:00	75	5.454545455	39.7	14.7	72	3	13	0	1	5	4
c3	2020-05-31 09:00:00	85	196.3636364	46.7	14.9	72	13	13	0	1	5	4
c1	2020-05-31 10:00:00	75	43.63636364	51	18.4	72	3	14.2	0	1	5	4
c2	2020-05-31 10:00:00	75	21.81818182	39.7	18.4	72	3	14.2	0	1	5	4
c3	2020-05-31 10:00:00	85	212.7272727	46.3	19.1	72	13	14.2	0	1	5	4
c1	2020-05-31 11:00:00	75	27.27272727	50.5	20.3	72	3	16.4	0	1	5	4
c2	2020-05-31 11:00:00	75	21.81818182	39.4	20.3	72	3	16.4	0	1	5	4
c3	2020-05-31 11:00:00	85	229.0909091	46.4	20.9	72	13	16.4	0	1	5	4
c1	2020-05-31 12:00:00	75	49.09090909	50.5	21.7	72	3	16.3	0	1	5	4
c2	2020-05-31 12:00:00	75	32.72727273	39.4	22.1	72	3	16.3	0	1	5	4
c3	2020-05-31 12:00:00	85	338.1818182	46	23.5	72	13	16.3	0	1	5	4
c1	2020-05-31 13:00:00	75	43.63636364	50.3	23.9	72	3	18.1	0	1	5	4
c2	2020-05-31 13:00:00	75	49.09090909	39.3	24.4	72	3	18.1	0	1	5	4
c3	2020-05-31 13:00:00	85	321.8181818	45.9	25.6	72	13	18.1	0	1	5	4
c1	2020-05-31 14:00:00	75	49.09090909	50.2	23.9	72	3	19.2	0	1	5	4
c2	2020-05-31 14:00:00	75	32.72727273	39.5	24.4	72	3	19.2	0	1	5	4
c3	2020-05-31 14:00:00	85	332.7272727	46.1	25.1	72	13	19.2	0	1	5	4
c1	2020-05-31 15:00:00	75	65.45454545	50.2	24.9	72	3	20.5	0	1	5	4
c2	2020-05-31 15:00:00	75	76.36363636	39.4	25.9	72	3	20.5	0	1	5	4
c3	2020-05-31 15:00:00	85	414.5454545	45.5	27.8	72	13	20.5	0	1	5	4
c1	2020-05-31 16:00:00	75	65.45454545	50.2	24.9	72	3	21.3	0	1	5	4
c2	2020-05-31 16:00:00	75	76.36363636	39.4	25.9	72	3	21.3	0	1	5	4
c3	2020-05-31 16:00:00	85	387.2727273	45.3	26.9	72	13	21.3	0	1	5	4
c1	2020-05-31 17:00:00	75	87.27272727	50.1	23.7	72	3	22.3	0	1	5	4
c2	2020-05-31 17:00:00	75	65.45454545	39.1	24.9	72	3	22.3	0	1	5	4
c3	2020-05-31 17:00:00	85	447.2727273	45.8	26.2	72	13	22.3	0	1	5	4
c1	2020-05-31 18:00:00	75	65.45454545	50.1	22.4	72	3	22.7	0	1	5	4
c2	2020-05-31 18:00:00	75	54.54545455	39.5	23	72	3	22.7	0	1	5	4
c3	2020-05-31 18:00:00	85	436.3636364	45.8	23	72	13	22.7	0	1	5	4
c1	2020-05-31 19:00:00	75	70.90909091	50.3	19.9	72	3	21.9	0	1	5	4
c2	2020-05-31 19:00:00	75	60	39.5	20.5	72	3	21.9	0	1	5	4
c3	2020-05-31 19:00:00	85	452.7272727	45.5	20.3	72	13	21.9	0	1	5	4
c1	2020-05-31 20:00:00	75	54.54545455	49.3	18	72	3	21.5	0	1	5	4
c2	2020-05-31 20:00:00	75	49.09090909	39.5	18.8	72	3	21.5	0	1	5	4
c3	2020-05-31 20:00:00	85	414.5454545	46.1	18.6	72	13	21.5	0	1	5	4
c1	2020-05-31 21:00:00	75	32.72727273	49.7	16	72	3	19.8	0	1	5	4
c2	2020-05-31 21:00:00	75	38.18181818	39.6	16.7	72	3	19.8	0	1	5	4
c3	2020-05-31 21:00:00	85	392.7272727	46.1	16.3	72	13	19.8	0	1	5	4
c1	2020-05-31 22:00:00	75	49.09090909	49.9	14.6	71.75	3.25	17.8	0	1	5	4
c2	2020-05-31 22:00:00	75	76.36363636	39.6	15.2	71.75	3.25	17.8	0	1	5	4
c3	2020-05-31 22:00:00	85	332.7272727	45.9	14.4	71.75	13.25	17.8	0	1	5	4
c1	2020-05-31 23:00:00	75	60	50.1	13.3	71.25	3.75	15.6	0	1	5	4
c2	2020-05-31 23:00:00	75	38.18181818	39.5	13.8	71.25	3.75	15.6	0	1	5	4
c3	2020-05-31 23:00:00	85	283.6363636	46.2	12.8	71.25	13.75	15.6	0	1	5	4
c1	2020-06-01 00:00:00	75	27.27272727	49.9	12.3	71	4	14.1	0	1	6	4
c2	2020-06-01 00:00:00	75	38.18181818	39.6	12.7	71	4	14.1	0	1	6	4
c3	2020-06-01 00:00:00	85	272.7272727	46	11.6	71	14	14.1	0	1	6	4
c1	2020-06-01 01:00:00	75	38.18181818	50.1	11.3	71	4	12	0	1	6	4
c2	2020-06-01 01:00:00	75	49.09090909	39.6	11.9	71	4	12	0	1	6	4
c3	2020-06-01 01:00:00	85	267.2727273	46.4	10.7	71	14	12	0	1	6	4
c1	2020-06-01 02:00:00	75	54.54545455	50.2	10.6	71	4	9.9	0	1	6	4
c2	2020-06-01 02:00:00	75	43.63636364	39.6	11.1	71	4	9.9	0	1	6	4
c3	2020-06-01 02:00:00	85	245.4545455	46.5	9.9	71	14	9.9	0	1	6	4
c1	2020-06-01 03:00:00	75	38.18181818	50.5	10.1	71	4	8.1	0	1	6	4
c2	2020-06-01 03:00:00	75	0	39.6	10.6	71	4	8.1	0	1	6	4
c3	2020-06-01 03:00:00	85	201.8181818	46.2	9.5	71	14	8.1	0	1	6	4
c1	2020-06-01 04:00:00	75	21.81818182	50.4	9.6	71	4	7.3	0	1	6	4
c2	2020-06-01 04:00:00	75	27.27272727	39.7	10.1	71	4	7.3	0	1	6	4
c3	2020-06-01 04:00:00	85	196.3636364	46.5	8.9	71	14	7.3	0	1	6	4
c1	2020-06-01 05:00:00	75	10.90909091	50.3	9.1	71.5	3.5	6.9	0	1	6	4
c2	2020-06-01 05:00:00	75	32.72727273	39.9	9.5	71.5	3.5	6.9	0	1	6	4
c3	2020-06-01 05:00:00	85	185.4545455	46.3	8.4	71.5	13.5	6.9	0	1	6	4
c1	2020-06-01 06:00:00	75	32.72727273	50.4	9.6	71.5	3.5	6.9	0	1	6	4
c2	2020-06-01 06:00:00	75	27.27272727	39.9	9.9	71.5	3.5	6.9	0	1	6	4
c3	2020-06-01 06:00:00	85	180	46.3	9	71.5	13.5	6.9	0	1	6	4
c1	2020-06-01 07:00:00	75	32.72727273	50.5	10.3	72	3	10.5	0	1	6	4
c2	2020-06-01 07:00:00	75	27.27272727	39.7	10.6	72	3	10.5	0	1	6	4
c3	2020-06-01 07:00:00	85	196.3636364	46.3	10.1	72	13	10.5	0	1	6	4
c1	2020-06-01 08:00:00	75	27.27272727	50.5	13	72	3	12.2	0	1	6	4
c2	2020-06-01 08:00:00	75	27.27272727	39.9	12.1	72	3	12.2	0	1	6	4
c3	2020-06-01 08:00:00	85	180	46.6	12.8	72	13	12.2	0	1	6	4
c1	2020-06-01 09:00:00	75	49.09090909	50.1	17.5	72	3	14	0	1	6	4
c2	2020-06-01 09:00:00	75	60	39.6	17.3	72	3	14	0	1	6	4
c3	2020-06-01 09:00:00	85	201.8181818	46.4	18.4	72	13	14	0	1	6	4
c1	2020-06-01 10:00:00	75	32.72727273	49.4	21.1	71.5	3.5	16	0	1	6	4
c2	2020-06-01 10:00:00	75	49.09090909	39.2	20.9	71.5	3.5	16	0	1	6	4
c3	2020-06-01 10:00:00	85	245.4545455	45.9	21.5	71.5	13.5	16	0	1	6	4
c1	2020-06-01 11:00:00	75	60	49.5	23	71.25	3.75	17.3	0	1	6	4
c2	2020-06-01 11:00:00	75	49.09090909	39.2	23.5	71.25	3.75	17.3	0	1	6	4
c3	2020-06-01 11:00:00	85	338.1818182	45.6	24.9	71.25	13.75	17.3	0	1	6	4
c1	2020-06-01 12:00:00	75	92.72727273	49.4	25.1	71	4	19.2	0	1	6	4
c2	2020-06-01 12:00:00	75	81.81818182	39	25.9	71	4	19.2	0	1	6	4
c3	2020-06-01 12:00:00	85	310.9090909	45.5	27.5	71	14	19.2	0	1	6	4
c1	2020-06-01 13:00:00	75	76.36363636	48.9	24.4	71	4	21.7	0	1	6	4
c2	2020-06-01 13:00:00	75	98.18181818	38.8	26.7	71	4	21.7	0	1	6	4
c3	2020-06-01 13:00:00	85	365.4545455	45.5	28.3	71	14	21.7	0	1	6	4
c1	2020-06-01 14:00:00	75	92.72727273	48.8	26.9	71	4	22.8	0	1	6	4
c2	2020-06-01 14:00:00	75	125.4545455	38.8	28	71	4	22.8	0	1	6	4
c3	2020-06-01 14:00:00	85	381.8181818	45.4	29.5	71	14	22.8	0	1	6	4
c1	2020-06-01 15:00:00	75	114.5454545	48.9	25.1	71	4	23.8	0	1	6	4
c2	2020-06-01 15:00:00	75	98.18181818	38.7	27.8	71	4	23.8	0	1	6	4
c3	2020-06-01 15:00:00	85	398.1818182	45.4	29.5	71	14	23.8	0	1	6	4
c1	2020-06-01 16:00:00	75	70.90909091	48.6	26.2	71	4	24.1	0	1	6	4
c2	2020-06-01 16:00:00	75	76.36363636	39	27.2	71	4	24.1	0	1	6	4
c3	2020-06-01 16:00:00	85	425.4545455	44.9	28.9	71	14	24.1	0	1	6	4
c1	2020-06-01 17:00:00	75	92.72727273	48.5	25.4	71	4	25.3	0	1	6	4
c2	2020-06-01 17:00:00	75	60	38.7	26.4	71	4	25.3	0	1	6	4
c3	2020-06-01 17:00:00	85	463.6363636	45.3	27.2	71	14	25.3	0	1	6	4
c1	2020-06-01 18:00:00	75	54.54545455	48.7	23	71	4	25.1	0	1	6	4
c2	2020-06-01 18:00:00	75	70.90909091	38.7	23.9	71	4	25.1	0	1	6	4
c3	2020-06-01 18:00:00	85	529.0909091	45.6	24.2	71	14	25.1	0	1	6	4
c1	2020-06-01 19:00:00	75	60	48.7	20.5	71	4	24.4	0	1	6	4
c2	2020-06-01 19:00:00	75	87.27272727	38.8	21.1	71	4	24.4	0	1	6	4
c3	2020-06-01 19:00:00	85	447.2727273	45.3	21.3	71	14	24.4	0	1	6	4
c1	2020-06-01 20:00:00	75	60	49.2	18.6	70	5	23.5	0	1	6	4
c2	2020-06-01 20:00:00	75	81.81818182	39	19.1	70	5	23.5	0	1	6	4
c3	2020-06-01 20:00:00	85	441.8181818	45.5	19.5	70	15	23.5	0	1	6	4
c1	2020-06-01 21:00:00	75	92.72727273	48.9	16.8	70	5	22.3	0	1	6	4
c2	2020-06-01 21:00:00	75	87.27272727	38.9	17.7	70	5	22.3	0	1	6	4
c3	2020-06-01 21:00:00	85	430.9090909	45.8	17.5	70	15	22.3	0	1	6	4
c1	2020-06-01 22:00:00	75	70.90909091	49.2	15.8	70	5	20.5	0	1	6	4
c2	2020-06-01 22:00:00	75	81.81818182	39.1	16.5	70	5	20.5	0	1	6	4
c3	2020-06-01 22:00:00	85	392.7272727	45.9	16.3	70	15	20.5	0	1	6	4
c1	2020-06-01 23:00:00	75	92.72727273	49.4	14.7	70	5	19	0	1	6	4
c2	2020-06-01 23:00:00	75	70.90909091	39.2	15.4	70	5	19	0	1	6	4
c3	2020-06-01 23:00:00	85	360	45.7	15	70	15	19	0	1	6	4
c1	2020-06-02 00:00:00	75	81.81818182	49.1	14.1	70	5	17.7	0	1	6	4
c2	2020-06-02 00:00:00	75	76.36363636	39.4	14.7	70	5	17.7	0	1	6	4
c3	2020-06-02 00:00:00	85	343.6363636	46	14	70	15	17.7	0	1	6	4
c1	2020-06-02 01:00:00	75	65.45454545	49.4	13.3	70	5	15.7	0	1	6	4
c2	2020-06-02 01:00:00	75	60	39.3	14	70	5	15.7	0	1	6	4
c3	2020-06-02 01:00:00	85	321.8181818	45.7	13.1	70	15	15.7	0	1	6	4
c1	2020-06-02 02:00:00	75	70.90909091	49.6	12.4	70	5	13.7	0	1	6	4
c2	2020-06-02 02:00:00	75	65.45454545	39.4	13.1	70	5	13.7	0	1	6	4
c3	2020-06-02 02:00:00	85	305.4545455	45.9	12.3	70	15	13.7	0	1	6	4
c1	2020-06-02 03:00:00	75	103.6363636	49.6	11.6	70	5	12.1	0	1	6	4
c2	2020-06-02 03:00:00	75	43.63636364	39.4	12.4	70	5	12.1	0	1	6	4
c3	2020-06-02 03:00:00	85	283.6363636	46.2	11.5	70	15	12.1	0	1	6	4
c1	2020-06-02 04:00:00	75	38.18181818	49.4	11.1	70	5	10.7	0	1	6	4
c2	2020-06-02 04:00:00	75	54.54545455	39.4	11.7	70	5	10.7	0	1	6	4
c3	2020-06-02 04:00:00	85	283.6363636	45.9	10.8	70	15	10.7	0	1	6	4
c1	2020-06-02 05:00:00	75	60	49.6	10.8	69.75	5.25	10.5	0	1	6	4
c2	2020-06-02 05:00:00	75	49.09090909	39.4	11.3	69.75	5.25	10.5	0	1	6	4
c3	2020-06-02 05:00:00	85	245.4545455	45.9	10.6	69.75	15.25	10.5	0	1	6	4
c1	2020-06-02 06:00:00	75	54.54545455	49.7	11.1	69	6	9.4	0	1	6	4
c2	2020-06-02 06:00:00	75	65.45454545	39.2	11.6	69	6	9.4	0	1	6	4
c3	2020-06-02 06:00:00	85	250.9090909	46	10.8	69	16	9.4	0	1	6	4
c1	2020-06-02 07:00:00	75	49.09090909	49.5	11.7	69	6	12.6	0	1	6	4
c2	2020-06-02 07:00:00	75	65.45454545	39.4	12.1	69	6	12.6	0	1	6	4
c3	2020-06-02 07:00:00	85	229.0909091	46.1	11.7	69	16	12.6	0	1	6	4
c1	2020-06-02 08:00:00	75	49.09090909	49.5	14.6	69	6	17.2	0	1	6	4
c2	2020-06-02 08:00:00	75	38.18181818	39.3	13.7	69	6	17.2	0	1	6	4
c3	2020-06-02 08:00:00	85	196.3636364	46	14.7	69	16	17.2	0	1	6	4
c1	2020-06-02 09:00:00	75	65.45454545	49.2	19.1	68.75	6.25	18.9	0	1	6	4
c2	2020-06-02 09:00:00	75	76.36363636	39	18.8	68.75	6.25	18.9	0	1	6	4
c3	2020-06-02 09:00:00	85	240	45.4	20.3	68.75	16.25	18.9	0	1	6	4
c1	2020-06-02 10:00:00	75	98.18181818	48.9	22.6	68	7	20.1	0	1	6	4
c2	2020-06-02 10:00:00	75	70.90909091	38.8	22.6	68	7	20.1	0	1	6	4
c3	2020-06-02 10:00:00	85	267.2727273	45.3	23.3	68	17	20.1	0	1	6	4
c1	2020-06-02 11:00:00	75	103.6363636	48.3	25.6	68	7	20.6	0	1	6	4
c2	2020-06-02 11:00:00	75	103.6363636	38.5	25.6	68	7	20.6	0	1	6	4
c3	2020-06-02 11:00:00	85	381.8181818	45.7	26.7	68	17	20.6	0	1	6	4
c1	2020-06-02 12:00:00	75	136.3636364	48.2	27.8	67.25	7.75	23.6	0	1	6	4
c2	2020-06-02 12:00:00	75	114.5454545	38.4	28	67.25	7.75	23.6	0	1	6	4
c3	2020-06-02 12:00:00	85	523.6363636	45	29.2	67.25	17.75	23.6	0	1	6	4
c1	2020-06-02 13:00:00	75	141.8181818	48.1	27.8	67	8	24.2	0	1	6	4
c2	2020-06-02 13:00:00	75	109.0909091	38.1	28.9	67	8	24.2	0	1	6	4
c3	2020-06-02 13:00:00	85	774.5454545	44.7	30.7	67	18	24.2	0	1	6	4
c1	2020-06-02 14:00:00	75	158.1818182	48	28.9	66.25	8.75	24.1	0	1	6	4
c2	2020-06-02 14:00:00	75	120	38	29.8	66.25	8.75	24.1	0	1	6	4
c3	2020-06-02 14:00:00	85	845.4545455	44.5	31.7	66.25	18.75	24.1	0	1	6	4
c1	2020-06-02 15:00:00	75	163.6363636	47.9	29.2	66	9	25.8	0	1	6	4
c2	2020-06-02 15:00:00	75	136.3636364	38	29.5	66	9	25.8	0	1	6	4
c3	2020-06-02 15:00:00	85	1107.272727	43.9	32.1	66	19	25.8	0	1	6	4
c1	2020-06-02 16:00:00	75	190.9090909	47.4	29.2	66	9	26.3	0	1	6	4
c2	2020-06-02 16:00:00	75	147.2727273	38	28.3	66	9	26.3	0	1	6	4
c3	2020-06-02 16:00:00	85	1134.545455	44	31.7	66	19	26.3	0	1	6	4
c1	2020-06-02 17:00:00	75	152.7272727	47.7	28.3	65	10	26.7	0	1	6	4
c2	2020-06-02 17:00:00	75	141.8181818	38	27.8	65	10	26.7	0	1	6	4
c3	2020-06-02 17:00:00	85	927.2727273	44.5	30.1	65	20	26.7	0	1	6	4
c1	2020-06-02 18:00:00	75	152.7272727	47.7	25.9	65	10	26.6	0	1	6	4
c2	2020-06-02 18:00:00	75	163.6363636	38	25.6	65	10	26.6	0	1	6	4
c3	2020-06-02 18:00:00	85	1069.090909	44.8	26.9	65	20	26.6	0	1	6	4
c1	2020-06-02 19:00:00	75	152.7272727	47.9	23	65	10	26.1	0	1	6	4
c2	2020-06-02 19:00:00	75	147.2727273	38.1	23.5	65	10	26.1	0	1	6	4
c3	2020-06-02 19:00:00	85	943.6363636	44.5	23.9	65	20	26.1	0	1	6	4
c1	2020-06-02 20:00:00	75	152.7272727	48.3	21.5	65.5	9.5	25.2	0	1	6	4
c2	2020-06-02 20:00:00	75	141.8181818	37.9	21.9	65.5	9.5	25.2	0	1	6	4
c3	2020-06-02 20:00:00	85	976.3636364	44.4	22.4	65.5	19.5	25.2	0	1	6	4
c1	2020-06-02 21:00:00	75	174.5454545	48.5	19.5	66	9	22.2	0	1	6	4
c2	2020-06-02 21:00:00	75	158.1818182	37.9	20.1	66	9	22.2	0	1	6	4
c3	2020-06-02 21:00:00	85	829.0909091	44.7	19.9	66	19	22.2	0	1	6	4
c1	2020-06-02 22:00:00	75	152.7272727	48.5	18.4	66	9	19.3	0	1	6	4
c2	2020-06-02 22:00:00	75	152.7272727	38.1	19.1	66	9	19.3	0	1	6	4
c3	2020-06-02 22:00:00	85	785.4545455	44.8	18.6	66	19	19.3	0	1	6	4
c1	2020-06-02 23:00:00	75	136.3636364	48.9	16.8	66	9	17.2	0	1	6	4
c2	2020-06-02 23:00:00	75	120	38.2	17.5	66	9	17.2	0	1	6	4
c3	2020-06-02 23:00:00	85	627.2727273	44.9	16.8	66	19	17.2	0	1	6	4
c1	2020-06-03 00:00:00	75	125.4545455	48.6	16.2	66	9	15.9	0	1	6	4
c2	2020-06-03 00:00:00	75	125.4545455	38.2	16.8	66	9	15.9	0	1	6	4
c3	2020-06-03 00:00:00	85	605.4545455	44.9	16.2	66	19	15.9	0	1	6	4
c1	2020-06-03 01:00:00	75	120	48.8	15	66.25	8.75	14.8	0	1	6	4
c2	2020-06-03 01:00:00	75	114.5454545	38.3	15.8	66.25	8.75	14.8	0	1	6	4
c3	2020-06-03 01:00:00	85	529.0909091	44.7	15	66.25	18.75	14.8	0	1	6	4
c1	2020-06-03 02:00:00	75	92.72727273	49.1	14.1	66.25	8.75	14.1	0	1	6	4
c2	2020-06-03 02:00:00	75	109.0909091	38.5	14.9	66.25	8.75	14.1	0	1	6	4
c3	2020-06-03 02:00:00	85	469.0909091	44.8	13.8	66.25	18.75	14.1	0	1	6	4
c1	2020-06-03 03:00:00	75	141.8181818	48.8	13.3	66	9	13.6	0	1	6	4
c2	2020-06-03 03:00:00	75	92.72727273	38.3	14	66	9	13.6	0	1	6	4
c3	2020-06-03 03:00:00	85	469.0909091	45.3	13	66	19	13.6	0	1	6	4
c1	2020-06-03 04:00:00	75	114.5454545	48.8	12.4	66	9	12.6	0	1	6	4
c2	2020-06-03 04:00:00	75	87.27272727	38.3	13.1	66	9	12.6	0	1	6	4
c3	2020-06-03 04:00:00	85	321.8181818	44.9	12.1	66	19	12.6	0	1	6	4
c1	2020-06-03 05:00:00	75	81.81818182	49.1	12.1	66.25	8.75	11.6	0	1	6	4
c2	2020-06-03 05:00:00	75	81.81818182	38.3	12.8	66.25	8.75	11.6	0	1	6	4
c3	2020-06-03 05:00:00	85	381.8181818	45.4	11.9	66.25	18.75	11.6	0	1	6	4
c1	2020-06-03 06:00:00	75	70.90909091	49	12.6	66	9	12.4	0	1	6	4
c2	2020-06-03 06:00:00	75	76.36363636	38.5	13.1	66	9	12.4	0	1	6	4
c3	2020-06-03 06:00:00	85	414.5454545	45	12.4	66	19	12.4	0	1	6	4
c1	2020-06-03 07:00:00	75	109.0909091	49.2	13.5	66	9	14.8	0	1	6	4
c2	2020-06-03 07:00:00	75	114.5454545	38.4	14	66	9	14.8	0	1	6	4
c3	2020-06-03 07:00:00	85	349.0909091	45.2	13.7	66	19	14.8	0	1	6	4
c1	2020-06-03 08:00:00	75	103.6363636	49	17.5	66	9	19.3	0	1	6	4
c2	2020-06-03 08:00:00	75	98.18181818	38.4	16.8	66	9	19.3	0	1	6	4
c3	2020-06-03 08:00:00	85	267.2727273	44.9	17.9	66	19	19.3	0	1	6	4
c1	2020-06-03 09:00:00	75	114.5454545	48.8	19.7	66	9	20.5	0	1	6	4
c2	2020-06-03 09:00:00	75	92.72727273	38.1	19.5	66	9	20.5	0	1	6	4
c3	2020-06-03 09:00:00	85	218.1818182	45.2	20.7	66	19	20.5	0	1	6	4
c1	2020-06-03 10:00:00	75	109.0909091	48.3	22.8	66	9	22.8	0	1	6	4
c2	2020-06-03 10:00:00	75	92.72727273	38.1	22.8	66	9	22.8	0	1	6	4
c3	2020-06-03 10:00:00	85	278.1818182	45	24.2	66	19	22.8	0	1	6	4
c1	2020-06-03 11:00:00	75	114.5454545	48.3	24.7	66	9	23.9	0	1	6	4
c2	2020-06-03 11:00:00	75	87.27272727	37.9	24.9	66	9	23.9	0	1	6	4
c3	2020-06-03 11:00:00	85	370.9090909	44.8	26.2	66	19	23.9	0	1	6	4
c1	2020-06-03 12:00:00	75	152.7272727	48.2	25.6	66	9	25.3	0	1	6	4
c2	2020-06-03 12:00:00	75	81.81818182	37.8	25.9	66	9	25.3	0	1	6	4
c3	2020-06-03 12:00:00	85	425.4545455	44.5	27.2	66	19	25.3	0	1	6	4
c1	2020-06-03 13:00:00	75	130.9090909	47.9	26.7	66	9	26.1	0	1	6	4
c2	2020-06-03 13:00:00	75	114.5454545	37.8	27.2	66	9	26.1	0	1	6	4
c3	2020-06-03 13:00:00	85	360	44.3	28.3	66	19	26.1	0	1	6	4
c1	2020-06-03 14:00:00	75	163.6363636	47.9	27.5	66	9	26.5	0	1	6	4
c2	2020-06-03 14:00:00	75	103.6363636	37.6	27.8	66	9	26.5	0	1	6	4
c3	2020-06-03 14:00:00	85	540	44.4	29.5	66	19	26.5	0	1	6	4
c1	2020-06-03 15:00:00	75	136.3636364	47.7	26.7	65.75	9.25	26.2	0	1	6	4
c2	2020-06-03 15:00:00	75	87.27272727	37.5	26.7	65.75	9.25	26.2	0	1	6	4
c3	2020-06-03 15:00:00	85	392.7272727	44.3	28.3	65.75	19.25	26.2	0	1	6	4
c1	2020-06-03 16:00:00	75	141.8181818	47.9	24.9	65	10	25.9	0	1	6	4
c2	2020-06-03 16:00:00	75	125.4545455	37.4	25.6	65	10	25.9	0	1	6	4
c3	2020-06-03 16:00:00	85	758.1818182	44.2	26.4	65	20	25.9	0	1	6	4
c1	2020-06-03 17:00:00	75	163.6363636	47.9	21.3	65	10	22.6	0.2	1	6	4
c2	2020-06-03 17:00:00	75	136.3636364	37.6	22.1	65	10	22.6	0.2	1	6	4
c3	2020-06-03 17:00:00	85	785.4545455	44.3	22.6	65	20	22.6	0.2	1	6	4
c1	2020-06-03 18:00:00	75	141.8181818	47.9	21.7	65	10	20.3	0	1	6	4
c2	2020-06-03 18:00:00	75	109.0909091	37.6	22.4	65	10	20.3	0	1	6	4
c3	2020-06-03 18:00:00	85	845.4545455	44.5	22.6	65	20	20.3	0	1	6	4
c1	2020-06-03 19:00:00	75	114.5454545	48.2	20.3	65	10	19.7	0	1	6	4
c2	2020-06-03 19:00:00	75	98.18181818	37.6	20.9	65	10	19.7	0	1	6	4
c3	2020-06-03 19:00:00	85	714.5454545	44.2	20.7	65	20	19.7	0	1	6	4
c1	2020-06-03 20:00:00	75	136.3636364	48.1	18.9	65	10	20	0	1	6	4
c2	2020-06-03 20:00:00	75	136.3636364	37.5	19.5	65	10	20	0	1	6	4
c3	2020-06-03 20:00:00	85	310.9090909	44.4	19.5	65	20	20	0	1	6	4
c1	2020-06-03 21:00:00	75	136.3636364	48	17.3	65	10	18.3	0	1	6	4
c2	2020-06-03 21:00:00	75	136.3636364	37.6	18	65	10	18.3	0	1	6	4
c3	2020-06-03 21:00:00	85	485.4545455	44.8	17.7	65	20	18.3	0	1	6	4
c1	2020-06-03 22:00:00	75	152.7272727	48.2	16.8	65	10	16.8	0	1	6	4
c2	2020-06-03 22:00:00	75	130.9090909	37.9	17.5	65	10	16.8	0	1	6	4
c3	2020-06-03 22:00:00	85	545.4545455	44.5	17.2	65	20	16.8	0	1	6	4
c1	2020-06-03 23:00:00	75	125.4545455	48.1	15	65	10	16.6	0	1	6	4
c2	2020-06-03 23:00:00	75	130.9090909	37.7	15.8	65	10	16.6	0	1	6	4
c3	2020-06-03 23:00:00	85	572.7272727	45	15	65	20	16.6	0	1	6	4
c1	2020-06-04 00:00:00	75	92.72727273	48.5	15.4	65	10	15.6	0	1	6	4
c2	2020-06-04 00:00:00	75	109.0909091	38	15.8	65	10	15.6	0	1	6	4
c3	2020-06-04 00:00:00	85	490.9090909	44.8	15.4	65	20	15.6	0	1	6	4
c1	2020-06-04 01:00:00	75	130.9090909	48.5	15.4	65	10	14.7	0	1	6	4
c2	2020-06-04 01:00:00	75	120	38	15.8	65	10	14.7	0	1	6	4
c3	2020-06-04 01:00:00	85	529.0909091	44.9	15.4	65	20	14.7	0	1	6	4
c1	2020-06-04 02:00:00	75	141.8181818	48.5	15.4	65	10	15	0.1	1	6	4
c2	2020-06-04 02:00:00	75	136.3636364	38	15.7	65	10	15	0.1	1	6	4
c3	2020-06-04 02:00:00	85	332.7272727	44.9	15.4	65	20	15	0.1	1	6	4
c1	2020-06-04 03:00:00	75	147.2727273	48.4	14.7	65	10	14.6	0	1	6	4
c2	2020-06-04 03:00:00	75	130.9090909	37.9	15.4	65	10	14.6	0	1	6	4
c3	2020-06-04 03:00:00	85	490.9090909	44.8	14.7	65	20	14.6	0	1	6	4
c1	2020-06-04 04:00:00	75	136.3636364	48.4	14.3	65	10	13.9	0	1	6	4
c2	2020-06-04 04:00:00	75	103.6363636	37.9	14.7	65	10	13.9	0	1	6	4
c3	2020-06-04 04:00:00	85	436.3636364	44.7	14.1	65	20	13.9	0	1	6	4
c1	2020-06-04 05:00:00	75	103.6363636	48.4	14	65	10	13.4	0	1	6	4
c2	2020-06-04 05:00:00	75	103.6363636	37.9	14.4	65	10	13.4	0	1	6	4
c3	2020-06-04 05:00:00	85	441.8181818	44.7	13.8	65	20	13.4	0	1	6	4
c1	2020-06-04 06:00:00	75	120	48.4	14.3	65	10	14.6	0	1	6	4
c2	2020-06-04 06:00:00	75	103.6363636	37.9	14.7	65	10	14.6	0	1	6	4
c3	2020-06-04 06:00:00	85	452.7272727	45.2	14.3	65	20	14.6	0	1	6	4
c1	2020-06-04 07:00:00	75	125.4545455	48.5	15.4	65	10	14.6	0	1	6	4
c2	2020-06-04 07:00:00	75	114.5454545	38	15.7	65	10	14.6	0	1	6	4
c3	2020-06-04 07:00:00	85	310.9090909	44.9	15.5	65	20	14.6	0	1	6	4
c1	2020-06-04 08:00:00	75	87.27272727	48.5	16.3	65	10	15.7	0	1	6	4
c2	2020-06-04 08:00:00	75	70.90909091	37.6	16.5	65	10	15.7	0	1	6	4
c3	2020-06-04 08:00:00	85	250.9090909	45	16.5	65	20	15.7	0	1	6	4
c1	2020-06-04 09:00:00	75	98.18181818	48.4	18.8	65	10	17.5	0	1	6	4
c1	2020-06-04 09:00:00	75	98.18181818	48.4	18.8	65	10	17.5	0	1	6	4
c1	2020-06-04 09:00:00	75	81.81818182	48.1	18	65	10	17.5	0	1	6	4
c1	2020-06-04 09:00:00	75	81.81818182	48.1	18	65	10	17.5	0	1	6	4
c1	2020-06-04 09:00:00	75	81.81818182	48.1	18	65	10	17.5	0	1	6	4
c1	2020-06-04 09:00:00	75	81.81818182	48.1	18	65	10	17.5	0	1	6	4
c1	2020-06-04 09:00:00	75	81.81818182	48.1	18	65	10	17.5	0	1	6	4
c1	2020-06-04 09:00:00	75	98.18181818	48.4	18.8	65	10	17.5	0	1	6	4
c1	2020-06-04 09:00:00	75	98.18181818	48.4	18.8	65	10	17.5	0	1	6	4
c1	2020-06-04 09:00:00	75	98.18181818	48.4	18.8	65	10	17.5	0	1	6	4
c1	2020-06-04 09:00:00	75	98.18181818	48.4	18.8	65	10	17.5	0	1	6	4
c1	2020-06-04 09:00:00	75	81.81818182	48.1	18	65	10	17.5	0	1	6	4
c1	2020-06-04 09:00:00	75	81.81818182	48.1	18	65	10	17.5	0	1	6	4
c1	2020-06-04 09:00:00	75	98.18181818	48.4	18.8	65	10	17.5	0	1	6	4
c1	2020-06-04 09:00:00	75	98.18181818	48.4	18.8	65	10	17.5	0	1	6	4
c1	2020-06-04 09:00:00	75	81.81818182	48.1	18	65	10	17.5	0	1	6	4
c2	2020-06-04 09:00:00	75	70.90909091	37.5	18.8	65	10	17.5	0	1	6	4
c2	2020-06-04 09:00:00	75	70.90909091	37.6	18.2	65	10	17.5	0	1	6	4
c2	2020-06-04 09:00:00	75	70.90909091	37.6	18.2	65	10	17.5	0	1	6	4
c2	2020-06-04 09:00:00	75	70.90909091	37.6	18.2	65	10	17.5	0	1	6	4
c2	2020-06-04 09:00:00	75	70.90909091	37.5	18.8	65	10	17.5	0	1	6	4
c2	2020-06-04 09:00:00	75	70.90909091	37.5	18.8	65	10	17.5	0	1	6	4
c2	2020-06-04 09:00:00	75	70.90909091	37.6	18.2	65	10	17.5	0	1	6	4
c2	2020-06-04 09:00:00	75	70.90909091	37.6	18.2	65	10	17.5	0	1	6	4
c2	2020-06-04 09:00:00	75	70.90909091	37.6	18.2	65	10	17.5	0	1	6	4
c2	2020-06-04 09:00:00	75	70.90909091	37.5	18.8	65	10	17.5	0	1	6	4
c2	2020-06-04 09:00:00	75	70.90909091	37.5	18.8	65	10	17.5	0	1	6	4
c2	2020-06-04 09:00:00	75	70.90909091	37.5	18.8	65	10	17.5	0	1	6	4
c2	2020-06-04 09:00:00	75	70.90909091	37.5	18.8	65	10	17.5	0	1	6	4
c2	2020-06-04 09:00:00	75	70.90909091	37.5	18.8	65	10	17.5	0	1	6	4
c2	2020-06-04 09:00:00	75	70.90909091	37.6	18.2	65	10	17.5	0	1	6	4
c2	2020-06-04 09:00:00	75	70.90909091	37.6	18.2	65	10	17.5	0	1	6	4
c3	2020-06-04 09:00:00	85	267.2727273	44.8	19.5	65	20	17.5	0	1	6	4
c3	2020-06-04 09:00:00	85	267.2727273	44.8	19.1	65	20	17.5	0	1	6	4
c3	2020-06-04 09:00:00	85	267.2727273	44.8	19.5	65	20	17.5	0	1	6	4
c3	2020-06-04 09:00:00	85	267.2727273	44.8	19.5	65	20	17.5	0	1	6	4
c3	2020-06-04 09:00:00	85	267.2727273	44.8	19.1	65	20	17.5	0	1	6	4
c3	2020-06-04 09:00:00	85	267.2727273	44.8	19.1	65	20	17.5	0	1	6	4
c3	2020-06-04 09:00:00	85	267.2727273	44.8	19.1	65	20	17.5	0	1	6	4
c3	2020-06-04 09:00:00	85	267.2727273	44.8	19.1	65	20	17.5	0	1	6	4
c3	2020-06-04 09:00:00	85	267.2727273	44.8	19.1	65	20	17.5	0	1	6	4
c3	2020-06-04 09:00:00	85	267.2727273	44.8	19.1	65	20	17.5	0	1	6	4
c3	2020-06-04 09:00:00	85	267.2727273	44.8	19.5	65	20	17.5	0	1	6	4
c3	2020-06-04 09:00:00	85	267.2727273	44.8	19.5	65	20	17.5	0	1	6	4
c3	2020-06-04 09:00:00	85	267.2727273	44.8	19.5	65	20	17.5	0	1	6	4
c3	2020-06-04 09:00:00	85	267.2727273	44.8	19.5	65	20	17.5	0	1	6	4
c3	2020-06-04 09:00:00	85	267.2727273	44.8	19.5	65	20	17.5	0	1	6	4
c3	2020-06-04 09:00:00	85	267.2727273	44.8	19.1	65	20	17.5	0	1	6	4
c1	2020-06-04 10:00:00	75	92.72727273	48.1	21.1	65	10	19.8	0	1	6	4
c2	2020-06-04 10:00:00	75	54.54545455	37.5	21.3	65	10	19.8	0	1	6	4
c3	2020-06-04 10:00:00	85	240	44.9	22.1	65	20	19.8	0	1	6	4
c1	2020-06-04 11:00:00	75	98.18181818	48.3	19.7	64.75	10.25	20.6	0	1	6	4
c2	2020-06-04 11:00:00	75	54.54545455	37.4	20.1	64.75	10.25	20.6	0	1	6	4
c3	2020-06-04 11:00:00	85	174.5454545	44.8	20.7	64.75	20.25	20.6	0	1	6	4
c1	2020-06-04 12:00:00	75	81.81818182	48	21.1	64.5	10.5	19.7	0	1	6	4
c2	2020-06-04 12:00:00	75	16.36363636	37.2	21.3	64.5	10.5	19.7	0	1	6	4
c3	2020-06-04 12:00:00	85	261.8181818	44.8	21.9	64.5	20.5	19.7	0	1	6	4
c1	2020-06-04 13:00:00	75	76.36363636	48.3	19.7	64.5	10.5	20.6	0	1	6	4
c2	2020-06-04 13:00:00	75	27.27272727	37.4	20.1	64.5	10.5	20.6	0	1	6	4
c3	2020-06-04 13:00:00	85	229.0909091	44.8	20.5	64.5	20.5	20.6	0	1	6	4
c1	2020-06-04 14:00:00	75	81.81818182	48.4	20.1	64.25	10.75	19.5	0.1	1	6	4
c2	2020-06-04 14:00:00	75	38.18181818	37.5	20.5	64.25	10.75	19.5	0.1	1	6	4
c3	2020-06-04 14:00:00	85	474.5454545	44.9	20.9	64.25	20.75	19.5	0.1	1	6	4
c1	2020-06-04 15:00:00	75	81.81818182	48.2	18.9	64.25	10.75	17.6	0.2	1	6	4
c2	2020-06-04 15:00:00	75	65.45454545	37.5	19.5	64.25	10.75	17.6	0.2	1	6	4
c3	2020-06-04 15:00:00	85	501.8181818	44.8	19.3	64.25	20.75	17.6	0.2	1	6	4
c1	2020-06-04 16:00:00	75	98.18181818	48.2	18.9	64	11	17	0.4	1	6	4
c2	2020-06-04 16:00:00	75	76.36363636	37.5	19.3	64	11	17	0.4	1	6	4
c3	2020-06-04 16:00:00	85	523.6363636	44.8	19.1	64	21	17	0.4	1	6	4
c1	2020-06-04 17:00:00	75	98.18181818	48.2	18.8	64.5	10.5	16.9	0.8	1	6	4
c2	2020-06-04 17:00:00	75	70.90909091	37.5	19.3	64.5	10.5	16.9	0.8	1	6	4
c3	2020-06-04 17:00:00	85	529.0909091	44.8	19.1	64.5	20.5	16.9	0.8	1	6	4
c1	2020-06-04 18:00:00	75	109.0909091	48.1	18.2	64	11	17	0.1	1	6	4
c2	2020-06-04 18:00:00	75	103.6363636	37.3	18.8	64	11	17	0.1	1	6	4
c3	2020-06-04 18:00:00	85	305.4545455	44.8	18.4	64	21	17	0.1	1	6	4
c1	2020-06-04 19:00:00	75	-16.36363636	48.8	17.5	64	11	17	0.1	1	6	4
c2	2020-06-04 19:00:00	75	-32.72727273	38.2	18	64	11	17	0.1	1	6	4
c3	2020-06-04 19:00:00	85	0	45.5	17.5	64	21	17	0.1	1	6	4
c1	2020-06-04 20:00:00	75	49.09090909	48.6	16.5	64	11	14.7	0	1	6	4
c2	2020-06-04 20:00:00	75	65.45454545	38.1	17	64	11	14.7	0	1	6	4
c3	2020-06-04 20:00:00	85	240	45	16.5	64	21	14.7	0	1	6	4
c1	2020-06-04 21:00:00	75	70.90909091	48.6	16	64	11	15	0	1	6	4
c2	2020-06-04 21:00:00	75	81.81818182	38	16.5	64	11	15	0	1	6	4
c3	2020-06-04 21:00:00	85	250.9090909	45.5	16	64	21	15	0	1	6	4
c1	2020-06-04 22:00:00	75	92.72727273	48.6	15.8	64.25	10.75	14.7	0	1	6	4
c2	2020-06-04 22:00:00	75	92.72727273	38	16.3	64.25	10.75	14.7	0	1	6	4
c3	2020-06-04 22:00:00	85	267.2727273	45.2	15.8	64.25	20.75	14.7	0	1	6	4
c1	2020-06-04 23:00:00	75	98.18181818	48.5	15.5	64	11	14.6	0	1	6	4
c2	2020-06-04 23:00:00	75	114.5454545	38	16	64	11	14.6	0	1	6	4
c3	2020-06-04 23:00:00	85	272.7272727	45.2	15.5	64	21	14.6	0	1	6	4
c1	2020-06-05 00:00:00	75	81.81818182	48.5	15	64	11	14.2	0	1	6	4
c2	2020-06-05 00:00:00	75	103.6363636	38.1	15.7	64	11	14.2	0	1	6	4
c3	2020-06-05 00:00:00	85	272.7272727	45.2	15.2	64	21	14.2	0	1	6	4
c1	2020-06-05 01:00:00	75	87.27272727	48.4	14.4	64	11	12.9	0.1	1	6	4
c2	2020-06-05 01:00:00	75	98.18181818	38.1	14.9	64	11	12.9	0.1	1	6	4
c3	2020-06-05 01:00:00	85	256.3636364	45.4	14.4	64	21	12.9	0.1	1	6	4
c1	2020-06-05 02:00:00	75	109.0909091	48.4	14.1	64	11	12.8	0	1	6	4
c2	2020-06-05 02:00:00	75	98.18181818	38.1	14.6	64	11	12.8	0	1	6	4
c3	2020-06-05 02:00:00	85	261.8181818	45.4	14.1	64	21	12.8	0	1	6	4
c1	2020-06-05 03:00:00	75	98.18181818	48.7	13.8	64	11	12.3	0	1	6	4
c2	2020-06-05 03:00:00	75	103.6363636	37.9	14.3	64	11	12.3	0	1	6	4
c3	2020-06-05 03:00:00	85	256.3636364	45.4	13.8	64	21	12.3	0	1	6	4
c1	2020-06-05 04:00:00	75	65.45454545	48.7	13.5	64	11	12.1	0	1	6	4
c2	2020-06-05 04:00:00	75	109.0909091	38	14	64	11	12.1	0	1	6	4
c3	2020-06-05 04:00:00	85	250.9090909	45.4	13.5	64	21	12.1	0	1	6	4
c1	2020-06-05 05:00:00	75	103.6363636	48.7	13.5	64	11	11.9	0	1	6	4
c2	2020-06-05 05:00:00	75	109.0909091	38.2	13.8	64	11	11.9	0	1	6	4
c3	2020-06-05 05:00:00	85	278.1818182	45.4	13.4	64	21	11.9	0	1	6	4
c1	2020-06-05 06:00:00	75	81.81818182	48.7	12.4	64	11	10.1	0.4	1	6	4
c2	2020-06-05 06:00:00	75	92.72727273	38.4	12.8	64	11	10.1	0.4	1	6	4
c3	2020-06-05 06:00:00	85	256.3636364	45.3	12.3	64	21	10.1	0.4	1	6	4
c1	2020-06-05 07:00:00	75	81.81818182	48.7	12.7	64	11	10.4	0	1	6	4
c2	2020-06-05 07:00:00	75	76.36363636	38.1	13	64	11	10.4	0	1	6	4
c3	2020-06-05 07:00:00	85	234.5454545	45.4	12.6	64	21	10.4	0	1	6	4
c1	2020-06-05 08:00:00	75	81.81818182	48.7	13.5	64	11	10.7	0.4	1	6	4
c2	2020-06-05 08:00:00	75	43.63636364	38.3	13.8	64	11	10.7	0.4	1	6	4
c3	2020-06-05 08:00:00	85	201.8181818	45.3	13.5	64	21	10.7	0.4	1	6	4
c1	2020-06-05 09:00:00	75	5.454545455	48.4	14.6	64	11	11.2	0	1	6	4
c2	2020-06-05 09:00:00	75	-5.454545455	37.9	14.9	64	11	11.2	0	1	6	4
c3	2020-06-05 09:00:00	85	190.9090909	45.4	14.7	64	21	11.2	0	1	6	4
c1	2020-06-05 10:00:00	75	49.09090909	48.4	16	64	11	12.3	0	1	6	4
c2	2020-06-05 10:00:00	75	0	37.8	16.5	64	11	12.3	0	1	6	4
[truncated: 1,129 more rows]
