# Supplementary material for: Temporal patterns and drivers of CO 2 emission from dry sediments in a groyne field of a large river
Source: Copernicus journal article supplement (doi:10.5194/bg-19-5221-2022), 2022-11-18
Supplement: Supplementary file 1 [file bg-19-5221-2022-supplement.zip › Koschorreck et al. SI.pdf]

# Temporal patterns and potential drivers of CO<sub>2</sub> emission from dry sediments of a large river

Matthias Koschorreck, Klaus Holger Knorr, Lelaina Teichert

## Supplemental Information

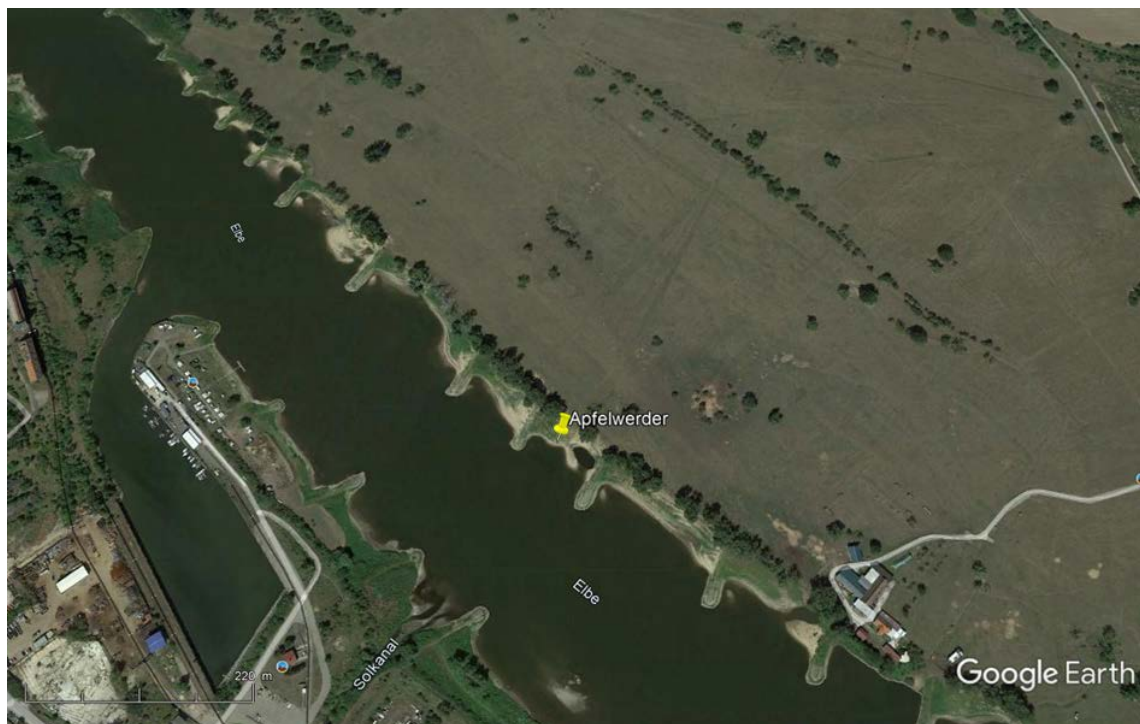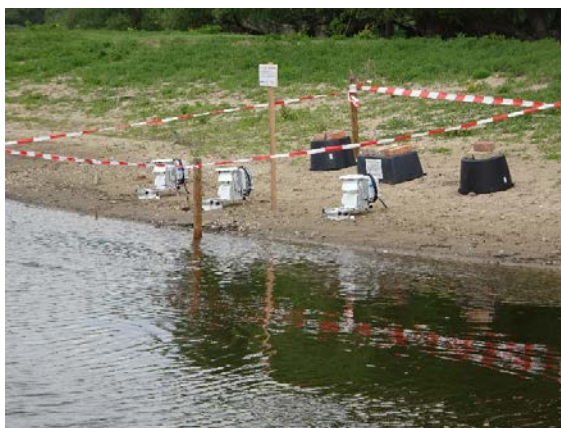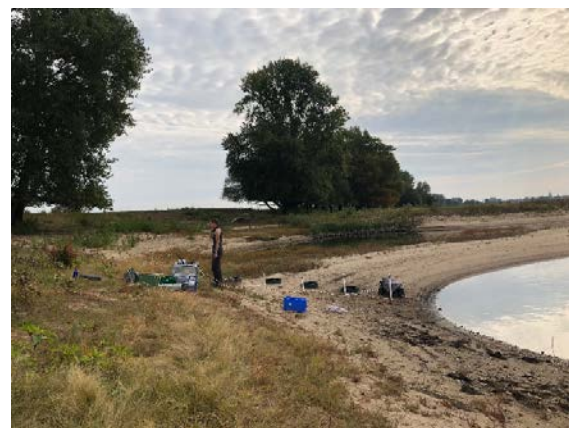

Fig.S1: Location of the intensive research site (image from Google Earth) and photographs of automatic chambers (left) and transect measurements during intensive campaigns (right) at river Elbe.

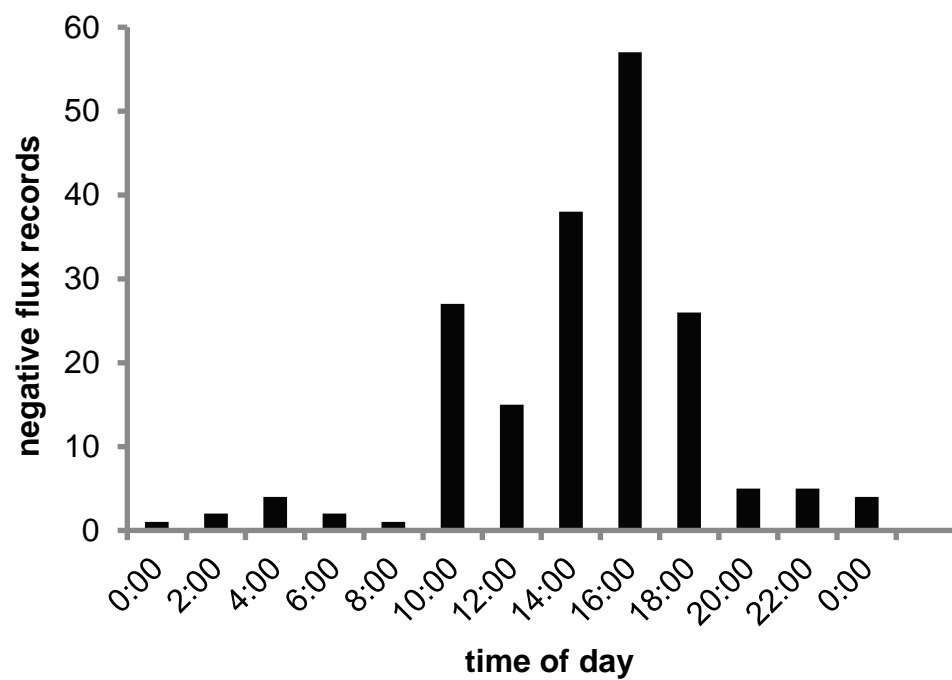

Fig.S2: Histogram of the frequency of negative fluxes depending on time of day.

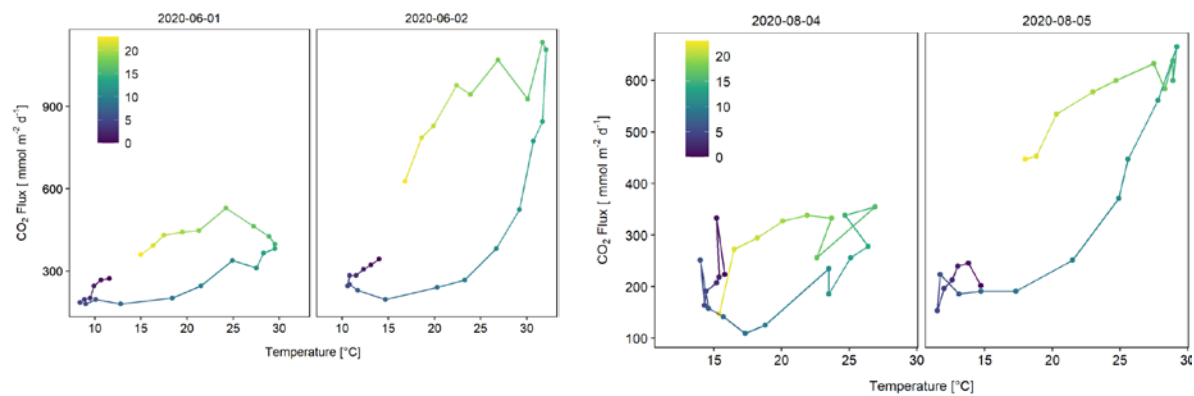

Fig.S3: Temperature response of CO<sub>2</sub> fluxes on selected days. The colors represent the hour of the day.

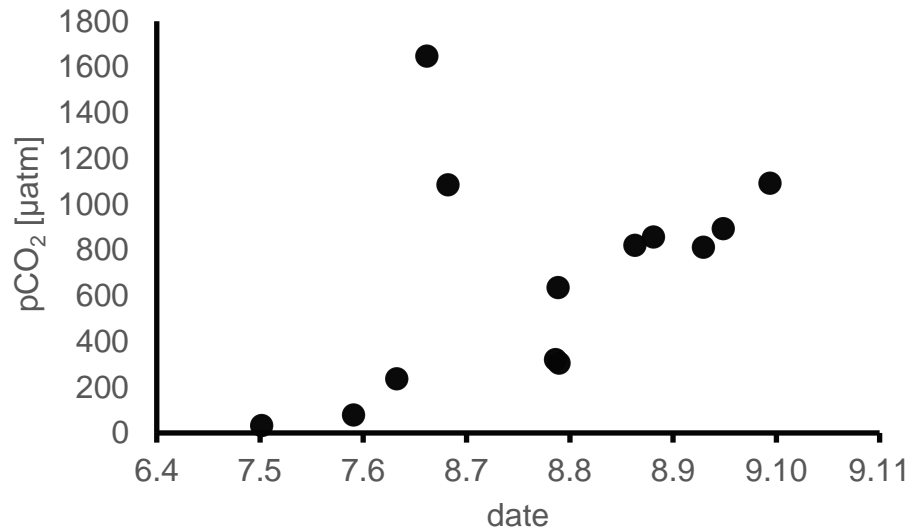

Fig.S4: CO<sub>2</sub> concentration in river Elbe water measured by a membrane equilibrator (Liqui Cell MM, 3M) connected to a CO<sub>2</sub> analyzer (EGM4, PP-Systems).

Table S1: results of mixed effect linear models (n=3128). Tsoil=soil temperature, msoil=soil moisture, diff=thickness of unsaturated zone.

| Predictors                                           | Full model           |               |                  | Final model          |               |                  |
|------------------------------------------------------|----------------------|---------------|------------------|----------------------|---------------|------------------|
|                                                      | Estimates            | CI            | p                | Estimates            | CI            | p                |
| (Intercept)                                          | 5.63                 | 5.12 – 6.14   | <b>&lt;0.001</b> | 5.01                 | 4.73 – 5.29   | <b>&lt;0.001</b> |
| tsoil                                                | -0.04                | -0.06 – -0.01 | <b>0.006</b>     | -0.02                | -0.03 – -0.01 | <b>&lt;0.001</b> |
| msoil                                                | -0.02                | -0.03 – -0.01 | <b>0.002</b>     |                      |               |                  |
| diff                                                 | -0.05                | -0.08 – -0.02 | <b>0.001</b>     | 0.02                 | 0.01 – 0.03   | <b>&lt;0.001</b> |
| tsoil * msoil                                        | 0.00                 | -0.00 – 0.00  | 0.104            |                      |               |                  |
| tsoil * diff                                         | 0.01                 | 0.00 – 0.01   | <b>&lt;0.001</b> | 0.00                 | 0.00 – 0.00   | <b>&lt;0.001</b> |
| msoil * diff                                         | 0.00                 | 0.00 – 0.00   | <b>&lt;0.001</b> |                      |               |                  |
| (tsoil * msoil) * diff                               | -0.00                | -0.00 – -0.00 | <b>&lt;0.001</b> |                      |               |                  |
| Random Effects                                       |                      |               |                  |                      |               |                  |
| σ <sup>2</sup>                                       | 0.13                 |               |                  | 0.13                 |               |                  |
| τ <sub>00</sub>                                      | 0.11 <sub>site</sub> |               |                  | 0.12 <sub>site</sub> |               |                  |
| ICC                                                  | 0.45                 |               |                  | 0.46                 |               |                  |
| N                                                    | 7 <sub>site</sub>    |               |                  | 7 <sub>site</sub>    |               |                  |
| Observations                                         | 3128                 |               |                  | 3128                 |               |                  |
| Marginal R <sup>2</sup> / Conditional R <sup>2</sup> | 0.287 / 0.605        |               |                  | 0.267 / 0.606        |               |                  |
